# Supplementary material for: An Individual Alginate Lyase is Effective in the Disruption of Laminaria Digitata Recalcitrant Cell Wall
Source: Research Square preprint supplement (doi:10.21203/rs.3.rs-141997/v1), 2021-01-13
Supplement: Supplementary file 1 [file bf95261bf83f8da21e179ae0.xlsx]

## Sheet: CAZYme Bank
An individual alginate lyase is effective in the disruption of Laminaria digitata recalcitrant cell wall
Mónica Costa, Luís Pio, Pedro Bule, Vânia Cardoso, Cristina M. Alfaia, Diogo Coelho, Joana Brás, Carlos M. G. A. Fontes, José A. M. Prates
Supplementary Material S1. CAZymes-sulfatases library used for the initial screening.
ID	Name	Category	E.C	Main Substrate	Organism	Catalytic Domain	Mw (kDa)	Protein Sequence
1	Licheninase	1,3-1,4-β-Glucanases	3.2.1.73	1,3-1,4-β-glucans	Clostridium thermocellum	GH16	26.7157	MKNRVISLLMASLLLVLSVIVAPFYKAEAATVVNTPFVAVFSNFDSSQWEKADWANGSVFNCVWKPSQVTFSNGKMILTLDREYGGSYPYKSGEYRTKSFFGYGYYEVRMKAAKNVGIVSSFFTYTGPSDNNPWDEIDIEFLGKDTTKVQFNWYKNGVGGNEYLHNLGFDASQDFHTYGFEWRPDYIDFYVDGKKVYRGTRNIPVTPGKIMMNLWPGIGVDEWLGRYDGRTPLQAEYEYVKYYPNGVPQDNPTPTPTIAPSTPTNPNLPLKGDVNGDGHVNSSDYSLFKRYLLRVIDRFPVGDPQDGCGRHDRVVDSGSK
2	Cellulose 1,4-β-cellobiosidase	Cellobiohydrolases	3.2.1.91	Phosphoric acid-swollen cellulose, Avicel and others forms of insoluble cellulose	Clostridium cellulolyticum	GH48	78.8172	MSKNFKRVGAVAVAAAMSLSIMATTSINAASSPANKVYQDRFESMYSKIKDPANGYFSEQGIPYHSIETLMVEAPDYGHVTTSEAMSYYMWLEAMHGRFSGDFTGFDKSWSVTEQYLIPTEKDQPNTSMSRYDANKPATYAPEFQDPSKYPSPLDTSQPVGRDPINSQLTSAYGTSMLYGMHWILDVDNWYGFGARADGTSKPSYINTFQRGEQESTWETIPQPCWDEHKFGGQYGFLDLFTKDTGTPAKQFKYTNAPDADARAVQATYWADQWAKEQGKSVSTSVGKATKMGDYLRYSFFDKYFRKIGQPSQAGTGYDAAHYLLSWYYAWGGGIDSTWSWIIGSSHNHFGYQNPFAAWVLSTDANFKPKSSNGASDWAKSLDRQLEFYQWLQSAEGAI…
3	Glucan endo-1,3-β-D-glucosidase	1,3-β-Glucanases	3.2.1.39	1,3-β-glucans such as laminarin	Clostridium thermocellum	GH81	82.7844	MLKKKTIISLVLAAIILGSIIQPFEIANAQYYREGTGSYTVVLPPGAKVPQAEIYKTSNLQGAVPTNSWESSILWNQYSLPIYAHPLTFKFKAEGIEVGKPALGGSGIAYFGAHKNDFTVGHSSVYTFPDARADKISDFAVDAVMASGSGSIKATLMKGSPYAYFVFTGGNPRIDFSGTPTVFYGDSGSQCLGVTINGVNYGLFAPSGSKWQGIGTGTITCILPAGKNYFSIAVLPDNTVSTLTYYKDYAYCFVTDTKVEWSYNETESTLTTTFTAEVSVKEGTNKGTILALYPHQWRNNPHILPLPYTYSTLRGIMKTIQGTSFKTVYRYHGILPNLPDKGTYDREALNRYINELALQADAPVAVDTYWFGKHLGKLSCALPIAEQLGNISAKDRFIS…
4	Cellulose 1,4-β-cellobiosidase	Cellobiohydrolases	3.2.1.91	Phosphoric acid-swollen cellulose, Avicel and others forms of insoluble cellulose	Clostridium thermocellum	GH48-Doc	81.6247	MVKSRKISILLAVAMLVSIMIPTTAFAGPTKAPTKDGTSYKDLFLELYGKIKDPKNGYFSPDEGIPYHSIETLIVEAPDYGHVTTSEAFSYYVWLEAMYGNLTGNWSGVETAWKVMEDWIIPDSTEQPGMSSYNPNSPATYADEYEDPSYYPSELKFDTVRVGSDPVHNDLVSAYGPNMYLMHWLMDVDNWYGFGTGTRATFINTFQRGEQESTWETIPHPSIEEFKYGGPNGFLDLFTKDRSYAKQWRYTNAPDAEGRAIQAVYWANKWAKEQGKGSAVASVVSKAAKMGDFLRNDMFDKYFMKIGAQDKTPATGYDSAHYLMAWYTAWGGGIGASWAWKIGCSHAHFGYQNPFQGWVSATQSDFAPKSSNGKRDWTTSYKRQLEFYQWLQSAEGGIA…
5	-	Mini-Cellulosome	3.2.1.73	Variety of cellulosic substrates	Clostridium thermocellum	3×GH16 + Coh-Coh-Coh	Doc: 34.94 Coh: 51.19	MKNRVISLLMASLLLVLSVIVAPFYKAEAATVVNTPFVAVFSNFDSSQWEKADWANGSVFNCVWKPSQVTFSNGKMILTLDREYGGSYPYKSGEYRTKSFFGYGYYEVRMKAAKNVGIVSSFFTYTGPSDNNPWDEIDIEFLGKDTTKVQFNWYKNGVGGNEYLHNLGFDASQDFHTYGFEWRPDYIDFYVDGKKVYRGTRNIPVTPGKIMMNLWPGIGVDEWLGRYDGRTPLQAEYEYVKYYPNGVPQDNPTPTPTIAPSTPTNPNLPLKGDVNGDGHVNSSDYSLFKRYLLRVIDRFPVGDPQDGCGRHDRVVDSGSK
6	Cellulase	Cellulases	3.2.1.4	1,3-1,4-β-glucans and soluble 1,4-β-glucans	B. subtilis LN	GH16	26.13	MPYLKRVLLLLVTGLFMSLFAVTSTASAQTGGSFFDPFNGYNSGFWQKADGYSNGNMFNCTWRANNVSMTSLGEMRLALTSPAYNKFDCGENRSVQTYGYGLYEVRMKPAKNTGIVSSFFTYTGPTDGTPWDEIDIEFLGKDTTKVQFNYYTNGAGNHEKIVDLGFDAANAYHTYAFDWQPNSIKWYVDGQLKHTATNQIPTTPGKIMMNLWNGTGVDEWLGSYNGVNPLYAHYDWVRYTKK
7	β-1,4-glucanase	Cellulases	3.2.1.4	Amorphous cellulose (PASC)	Clostridium thermocellum F7	GH48	74.87	MKLRYKVRRRRRIITCCGIIAAVIVVSTLIITIKNSFKPSRQSSNSNVTYSKENVQSVYSDRFIALFEDIQKQGYLSEEGIPYHSIETLLVEAPDYGHLTTSEAMSYMVWLGATYGKLTGDWTYFKDAWDKTEQYIIPDPERDQPGVNSYIPTQPAQYAPEADSPEKYPTPGDINAPTGIDPIADELASTYGTKAIYQMHWLLDVDNWYGYGNHGDGTSRCSYINTYQRGSGESVWETIPHPSWEDFRWGQVNNGGFLKLFGNFGEPVRQWRYTSASDADARQIQATYWAYLWSKEQGKEKELQPYFEKAAKMGDYLRYTFFDKYFRPIGVQDSGRAGTGYDSCHYLLSWYASWGGDINGTWSWRIGSSHCHQGYQNPMAAYALAKESIFTPKSKNAKK…
8	Laccase	Laccases	1.3.3.5	2,20-azinobis(3-ethylbenzthiazoline-6-sulfonic acid) (ABTS)	Bacillus subtilis subsp. subtilis str. 168	AA NC	60.6	MTLEKFVDALPIPDTLKPVQQSKEKTYYEVTMEECTHQLHRDLPPTRLWGYNGLFPGPTIEVKRNENVYVKWMNNLPSTHFLPIDHTIHHSDSQHEEPEVKTVVHLHGGVTPDDSDGYPEAWFSKDFEQTGPYFKREVYHYPNQQRGAILWYHDHAMALTRLNVYAGLVGAYIIHDPKEKRLKLPSDEYDVPLLITDRTINEDGSLFYPSAPENPSPSLPNPSIVPAFCGETILVNGKVWPYLEVEPRKYRFRVINASNTRTYNLSLDNGGDFIQIGSDGGLLPRSVKLNSFSLAPAERYDIIIDFTAYEGESIILANSAGCGGDVNPETDANIMQFRVTKPLAQKDESRKPKYLASYPSVQHERIQNIRTLKLAGTQDEYGRPVLLLNNKRWHDPVTE…
9	Unsaturated rhamnogalacturonyl hydrolase	Rhamnogalacturonases	3.2.1.172	Unsaturated rhamnogalacturonan (RG)	B. subtilis subsp. subtilis str. 168	GH105	43.52	MGSMDQSIAVKSPLTYAEALANTIMNTYTVEELPPANRWHYHQGVFLCGVLRLWEATGEKRYFEYAKAYADLLIDDNGNLLFRRDELDAIQAGLILFPLYEQTKDERYVKAAKRLRSLYGTLNRTSEGGFWHKDGYPYQMWLDGLYMGGPFALKYANLKQETELFDQVVLQESLMRKHTKDAKTGLFYHAWDEAKKMPWANEETGCSPEFWARSIGWYVMSLADMIEELPKKHPNRHVWKNTLQDMIKSICRYQDKETGLWYQIVDKGDRSDNWLESSGSCLYMYAIAKGINKGYLDRAYETTLLKAYQGLIQHKTETSEDGAFLVKDICVGTSAGFYDYYVSRERSTNDLHGAGAFILAMTELEPLFRSAGK
10	Laccase / Multicopper oxidase	Laccases	1.10.3.-	2,20-azinobis(3-ethylbenzthiazoline-6-sulfonic acid) (ABTS)	Escherichia coli K-12 MG1655	AA NC	55.52	MQRRDFLKYSVALGVASALPLWSRAVFAAERPTLPIPDLLTTDARNRIQLTIGAGQSTFGGKTATTWGYNGNLLGPAVKLQRGKAVTVDIYNQLTEETTLHWHGLEVPGEVDGGPQGIIPPGGKRSVTLNVDQPAATCWFHPHQHGKTGRQVAMGLAGLVVIEDDEILKLMLPKQWGIDDVPVIVQDKKFSADGQIDYQLDVMTAAVGWFGDTLLTNGAIYPQHAAPRGWLRLRLLNGCNARSLNFATSDNRPLYVIASDGGLLPEPVKVSELPVLMGERFEVLVEVNDNKPFDLVTLPVSQMGMAIAPFDKPHPVMRIQPIAISASGALPDTLSSLPALPSLEGLTVRKLQLSMDPMLDMMGMQMLMEKYGDQAMAGMDHSQMMGHMGHGNMNHMNHG…
11	Unsaturated rhamnogalacturonyl hydrolase	Rhamnogalacturonases	3.2.1.172	Rhamnogalacturonan oligosaccharides	Bacteroides thetaiotaomicron VPI-5482	GH105	52.65	AQKKKAVINDSNTPLHLLQPAYQGTYGDLTPEQVKKDIDRVFAYIDKETPARVVDKNTGKVITDYTAMGDEAQLERGAFRLASYEWGVTYSALIAAAETTGDKRYTDYVQNRFRFLAEVAPHFKRVYEEKGKTDSQLLQILTPHALDDAGAVCTAMIKLRLKDESLPVDGLIQNYFDFIINKEYRLADGTFARNRPQRNTLWLDDMFMGIPAVAQMSRYDKEAKNKYLAEAVKQFLQFADRMFIPEKGLYRHGWVESSTDHPAFCWARANGWALLTACELLDVLPEDYPQRPKVMDYFRAHVRGVTALQSGEGFWHQLLDCNDSYLETSATAIYVYCLAHAINKGWIDAIAYGPVAQLGWHAVAGKINEEGQVEGTCVGTGMAFDPAFYYYRPVNVYAA…
12	Laminarinase	1,3-β-Glucanases	3.2.1.39	1,3-β-glucans such as laminarin	Thermotoga maritima MSB8	GH16	32.12	MMSRLVFALLLFPVFILAQNILGNASFDEPILIAGVDIDPPAEDGSIDTGGNWVFFTNSNGEGTARVENGVLVVEITNGGDHTWSVQIIQAPIRVEKLHKYRVSFRAKASSQKNIGVKIGGTAGRGWTAYNPGTDESGGMVFELGTDWQKYEFEFVMRQETDENARFEFQLGRYTGTVWIDDVVMEDIGVLEVSGEENEIYTEEDEDKVEDWQLVWSQEFDDGVIDPNIWNFEIGNGHAKGIPGWGNGELEYYTDENAFVENGCLVIEARKEQVSDEYGTYDYTSARMTTEGKFEIKYGKIEIRAKLPKGKGIWPALWMLGNNIGEVGWPTCGEIDIMEMLGHDTRTVYGTAHGPGYSGGASIGVAYHLPEGVPDFSEDFHIFSIEWDEDEVEWYVDGQ…
13	GlcNAc-α-1,4-Gal-releasing endo-β-galactosidase	Galactosidases	3.2.1.-	GlcNAc-α-1,4-Gal-β-1,3-GalNAc-α1-Ser/Thr	Clostridium perfringens ATCC 10543	GH16	33.73	MFVFMLLLLLPFTISKAKDFPANPIEKAGYKLDFSDEFNGPTLDREKWTDYYLPHWCKDPESAKANYRFENGSLVEYITEDQKPWCPEHDGTVRSSAIMSFDKSWIHNFSGTTDNHERNEWRGYTTKYGYFEIRAKLSNTGGGGHQAWWMVGMQDDTNDWFNSKQTGEIDILETFFSKKDTWRIAAYGWNDPNFQTSWTISEDKVPSGDPTSEYHIYAMEWTPTALKFYYDNELFKVIYGSPDYEMGTILNIYTDAGSGAHNDVWPKEWAIDYMRVWKPVDGYKESESLNNYLIRNRQTGKFLYIEENNDKVSYGDITLKNEKNAKWSKEYRDGYTLLKNNETGEYLNIENQTGYIEHGKVPKTWWSAQWSEVPVDGYTRFVNRWKPNMSIHTESYEGV…
14	Endo-β-1,3-glucanase	1,3-β-Glucanases	3.2.1.39	Lichenan and laminarin	Pyrococcus furiosus DSM 3638	GH16	33.7	MKKEALLFLSLIFLVFVSGCIHHSTNQQLSSKQQVPEVIEIDGKQWRLIWHDEFEGSEVNKEYWTFEKGNGIAYGIPGWGNGELEYYTENNTYIVNGTLVIEARKEIITDPNEGTFLYTSSRLKTEGKVEFSPPVVVEARIKLPKGKGLWPAFWMLGSNIREVGWPNCGEIDIMEFLGHEPRTIHGTVHGPGYSGSKGITRAYTLPEGVPDFTEDFHVFGIVWYPDKIKWYVDGTFYHEVTKEQVEAMGYEWVFDKPFYIILNLAVGGYWPGNPDATTPFPAKMVVDYVRVYSFVSG
15	Oligoalginate lyase	Alginate lyases	4.2.2.	Low-viscosity alginate	Saccharophagus degradans 2-40	PL17	81.37	MLSVNTIKNTLLAAVLVSVPATAQVSGNGHPNLIVTEQDVANIAASWESYDAYAEQLNADKTNLDAFMAEGVVVPMPKDAGGGYTHEQHKRNYKAIRNAGFLYQVTGDEKYLTFAKDLLLAYAKMYPSLGEHPNRKEQSPGRLFWQSLNEAVWLVYSIQGYDAIIDGLAAEEKQEIESGVFLPMAKFLSVESPETFNKIHNHGTWAVAAVGMTGYVLGNDELVEISLMGLDKTGKAGFMKQLDKLFSPDGYYTEGPYYQRYALMPFIWFAKAIETNEPERKIFEYRNNILLKAVYTTIDLSYAGYFFPINDALKDKGIDTVELVHALAIVYSITGDNTLLDIAQEQGRISLTGDGLKVAKAVGEGLTQPYNYRSILLGDGADGDQGALSIHRLGEGHNH…
16	Xylanase D / Lichenase	1,3-1,4-β-Glucanases	3.2.1.73 3.2.1.8	1,3-1,4-β-glucans, in particular lichenan	Ruminococcus flavefaciens 17	GH16	30.59	MKKSIFKRYAAAVGLMASVLMFTAVPTTSNAADDQKTGKVGGFDWEMWNQNYTGTVSMNPGAGSFTCSWSGIENFLARMGKNYDDQKKNYKAFGDIVLTYDVEYTPRGNSYMCIYGWTRNPLMEYYIVEGWGDWEPPGNDGVDNFGTTTIDGKTYKIRKSMRYNQPSIEGTKTFPQYWSVRTTSGSRNNTTNYMKDQVSVTKHFDAWSKAGLDMSGTLYEVSLNIEGYRSNGSANVKSISFDGGIDIPDPEPIKPDENGYYLKENFESGEGNWSGRGSAKVKSSSGYDGTKGIFVSGREDTWNGASINLDELTFKAGETYSLGTAVMQDFESSVDFKLTLQYTDADGKENYDEVKTVTAAKGQWVDLSNSSYTIPSGATGLVLYVEVPESKTDFYMDGA…
17	Endo-β-1,3-glucanase / Laminarinase	1,3-β-Glucanases	3.2.1.39	Laminarin	Thermotoga petrophila RKU-1	GH16	30.79	MSRLVFALLLFPVFILAQNILGNASFDEPILIAGMDIDPPAEDGSINTEGNWVFFTNSNGEGTARVENGVLVVEITNGGDHTWSVQIIQAPIRVEKLHKYRVSFRARASSQRNVGVKIGGTAGRSWAAYNPGTDESGGMVFELGTDWQTYEFEFVMRQETDENARFEFQLGRYTGTVWIDDVVMEDIGVLEVSGEENEIYTEEDEDKVEDWQLVWSQEFDDGVIDPNIWNFEIGNGHAKGIPGWGNGELEYYTDENAFVENGCLVIEARKEQVSDEYGTYDYTSARMTTEGKFEIKYGKIEIRAKLPKGKGIWPALWMLGNNIGEVGWPTCGEIDIMEMLGHDTRTVYGTAHGPGYSGGASIGVAYHLPEGVPDFSEDFHIFSIEWDEDEVEWYVDGQL…
18	Laminarinase A	1,3-β-Glucanases	3.2.1.39	Laminarin	Thermotoga neapolitana	GH16	32.82	MKKLVLVLLLFPVFILAQNILHNGSFDAPILIAGVDIEPPAADGSINTQNNWVFFTNSNGEGEARVENGVLVVEITNGGDHTWSVQIIQSPIRVEKLHKYRVFFKAKASVQRNIGVKIGGTAGRGWAAYNPGTDESGGMVFELGTDWKTYEFEFVMRQETDENARFEFQLGKSTGTVWIDTVWIDDVVMEDVGTLEVSGEENEIYTEEDEDKVEDWQLVWSQEFDDGVIDPNVWNFEIGNGHAKGIPGWGNAELEYYTDKNAFVENGCLVIEARKEQVSDEYGTYDYTSARITTEGKFEIKYGKIEIRAKLPKGKGIWPALWMLGNNIGEVGWPTCGEIDIMEMLGHDTRTVLRTAHGPGYSGGASIGVAYHLPEEVPDFSEDFHVFSIEWDENEVEWY…
19	α-1,3-L-(3,6-anhydro)-galactosidase / α-neoagarobiose hydrolase	Agarases & Carragenases	3.2.1.159	Neoagaro-hexaose, -tetraose and -biose	Zobellia galactanivorans DsiJT	GH117	42.17	MNKYSQFLIFAAVLVSACNSPKTTKEMKSTDDCPEKVTFTPEQIDHLGITDTNHLSAASKRALKWPTDLGNEWFIQFGPLQPLKGDLAYEEGVVRRDPSAIIKENGKYYVWYSKSTGPTQGFGGDIEKDKVFPWDRCDIWYATSEDGWTWKEEGPAVTRGEKGAYDDRSVFTVEIMKWEDKYYLCYQTVKSPYNVRVKNQVGLAWADSPDGPWTKSEEPILSPADNGVWKGEEQDRFAVIKKGDFDSHKVHDPCIIPYKGKFYLYYKGEQMGEAITFGGRQIRHGVAIADNPKGPYVKSPYNPISNSGHEICVWPYNGGIASLITTDGPEKNTIQWAPDGINFEIKSVIPGVNAHAIGLNRTADVEKEPTEILRWGLTHIYNNGDYQSIMRFSSERKTR…
20	Endo-guluronate lyase	Poly α-guluronate lyases	4.2.2.11	Sodium alginate	Zobellia galactanivorans DsiJT	PL7	29.16	MKKNVFTTLRTVVNGDIMWKLIPVFFLALCLGSCSEEPVDPEEEAVLTKLSANSTAIGISSVSASTSQSPNVASNTLDGSTSTRWSGYGDGASITYDLGSSANIDYVKIAFYKGDSRKTKYEVWVGNSTSSLTKIKSKTSSGSTSDYETIDLPNSTARYIRIVGKGYVLNSGGSTVLWNSITKFQAWGSGGSSTLPISGNSPASVLGITANTWKINSFIGSPGSSATYYDDITDASGISYNTYSDDNYFYTDGEWVYFKCYRGLGGSANSQNPRVELREMDNGNLASWTGDSGTHTMEWTVQVNQLPQDTDGDGGVLCFGQIHGPSKNSDGVEVDDVVRVQFIGEENQSSGSVKLKISGYVTEEQGGSQTFSGYSLDTTYNCKLVYSGGYVELFMNGSS…
21	β-1,3-1,4-glucanase P2	1,3-1,4-β-Glucanases	3.2.1.73	1,3-1,4-β-glucans	Paenibacillus polymyxa SC2 / WY100	GH16	26.21	MKEKYWFTLVITGIVSLFFSVSAFAANVFWEPLSYYNPSTWQKADGYSNGDMFNCTWRANNVNFTNDGKMKLSLTSSAYNKFDGGEYRSKNTYRYGLYEVNMKPAKNTGIVSSFFTYTGPANGTQWDEIDIEFLGKDTTKVQFNYYTNGVGGHEKVVDLGFDASSGFHTYAFDWQPGYIKWYVDGVLKHTATTNIPKTPGQIMMNLWNGTGVDSWLGPYNGVNPLYAEYDWVKYTSN
22	Alginate lyase / Poly(β-mannuronate) lyase	Alginate lyases	4.2.2.3	Alginates	Saccharophagus degradans 2-40	PL7	31.8	MTFIKIMGAGALIASASLANAATFVLEKVNTGFSVDGGNGAVEARQVYLWETNTNNVNQNWVQISHGGGYYSYKKQNTNLCLDGGSGGARLQPVTLEVCDSSNYDQHWNKVKVYTGTEIYRMEKRNAPGFSIDGNGGAAARQAIYLWNSNSNNVNQQWEFIRTDEDTGDGKLAIATAFDDGSSHSSYPASKAIDGNTAWASRWAASGSPVNLTIQLEQTSRVTEVGIAWGQGGSRAYTFEIYARPGTSGSWTKVFDDVSSGSTAGIEVFDITDIDAQQIRVKTFENTAGTTWTNITEVEIYGADGGSSSSSSSSSSTSSTSSTSSTSSSSGGFNLNPNAPPSSNFNLSQWYLSVPTDTDGSGTADSIKEGELNSGYENNSYFYTGSDGGMVFKCPISGY…
23	Poly-MG alginate lyase	Alginate lyases	37348	Alginate (preferably poly(MG) block structure)	Pseudomonas aeruginosa PAO1	PL7	27.22	MPDLSTWNLTIPQGRPAITISTSQLQRDYRSDYFQRTADGIRFWVPVNGSHTRNSEFPRSELRETLSSGRPYNWRYARADNWLEATLRIEAVPSTRRMIIGQIHSDGSNSGQAAPLVKLLYQLRLDQGRVQALVRERPDDGGTRAYTLMDGIPLGQPFSYRIGVSRSGLLSVSVNGSALEQQLDPQWAYQGLYFKAGLYLQDNRGPSSEGGRATFSELRVSHQ
24	algal laminarin-specific b-glucanase / laminarinase (LamA;ZgLamA;zobellia_2431)	1,3-β-Glucanases	LAM 3.2.1.39	1,3-β-glucans, such as laminarin, and display low activity on mixed linked glucans	Zobellia galactanivorans DsiJT	GH16	30.6025	MKINRKTPFYRMIMINYLNLSLSILLVALSCSSTDSGQDLKPTDLKVDITLVGTDDAHPNGNGSGIVEVSASASNAVRYAFRFENGDVEDSTDGSTTHTFTEEGTHPYTIVVWAYSPTGEFINETFNVEVYKSNEAFNTLVFSDEFEYEGKPDPEKWHYQVIPPNNGSWHNNELQHYTNRSENSFVSDGTLKIRAIKEKYTFEGSTKDYTSARLNSKFAFTYGKVEVRAKLPSKKGTWPAIWTLGANSNETGNYFGEQYGNAEWPACGEIDILEQNGWDKESTIAHFHWSDLNSDEYQNLGGTTPITNASGSFHVYSLEWNASAMKVFLDDTLVYELKNSQNTPYNAPHYLLLNIAMGGTLGGDIPENFTDDIFEIDYVRIYQ
25	Endo-β-1,3(4)-glucanase	1,3-1,4-β-Glucanases	3.2.1.6	1,3-1,4-β-glucans, such as lichenan and laminarin.	Bacillus halodurans C-125	GH16	28.84	LKQTRTINWSGYTWNVKDTHGGKWGPGPNYFSSSHDNVWVDDAGRLHLKVTRCNGIWYCAEIFSTQTFGYGTYRFFIDGRPDQFDPNIVLGLFTYDSISADAPAVYHREIDIEFAKWGDPHALNTQYSIQPPKASNTESFQTLLNGYRSTHSFKWTPSEIKFMSLHGHYSKPPNPLEWYLIKDWSYTGEDIPNTRNEKAHLNLWLMDGRAPIDQQDAEIAITKFEFEPLNH
26	β-1,3-glucanase / Laminarinase	1,3-β-Glucanases	3.2.1.39	Laminarin	Bacillus halodurans C-125	GH81	79.61	MKGKNVQLLFALVVIILLFPTGASASPHAVSVGKGSYATEFPEIDFGGINDPGFRDQQGEPPATIYRSDRVTGPMQTNSWWGSLAVDRFSMNQYPHPFSVRHRAEGLHVFYDAPHNMVVHENREAGTWHIHGAIGTDFTIKHSGTANFEQAVVDDYNDWYVRGLLENGAHQMAITYGVGSPYIFVEYEDGSAVLDFDIAPDVWEMNGHVIGFSTHDHKHYAAFAPPGQNWSGIGSKTLTNNADYIAIAKLPEKDGNMLAKFEQYAYSVVRDAVADWTYDEATGTVTTTFEVTTEAKVQGAPDGTIFALYPHQYRHLASSSENQLLQNYQYEIIRGTMIGLEGKRFTTELTYPGVLPSLPDLGDYDRERLIGYLHDATSDYPTGSDTYELGKYIGKLATL…
27	Licheninase	1,3-1,4-β-Glucanases	3.2.1.73	1,3-1,4-β-glucans	Ruminococcus flavefaciens	GH16-GH16-GH16	89.3	MKYRSFRKFTSAFAAMAATAAASAFAFNAGAAGLAGDANCDNKVDISDAVIIMQSLSNPSRFGENGSDQYHLTAEGALNGDVNLRGNGISNADALTIQKYLLDTIQTLPESYAQGQPADNPATSTSTSTTTQPWQQPTTTSTTSAPVNPSTNLNIPDLGTPMNANATAVADFRKGSTPLFFASDGWENGDPFDCGWYKGQTSLDSGVLTLTIDKDKTGKYNYAGAEYRTSDHYGYGYYETSMQAIANDGVVSSFFTYTGPSEDNPWDEIDIEVLGKDPTKVQFNYYTNGQGNHEFMYDLGFDSSKAFHTYGFDWQPDHITWYVDGKPVYTANQNIPKTEGRIMMNTWPGRGVDGWLNHYNGNTPLTARYQWVTYNNGGAGNNNQQTQTTQQPTTTSTTT…
28	Cellobiohydrolase	Cellobiohydrolases	3.2.1.91	Amorphous and crystalline cellulose	Clostridium thermocellum ATCC 27405 / DSM 1237	GH9	59.46	MKFRRSICTAVLLAVLLTLLVPTSVFALEDNSSTLPPYKNDLLYERTFDEGLCYPWHTCEDSGGKCSFDVVDVPGQPGNKAFAVTVLDKGQNRWSVQMRHRGLTLEQGHTYRVRLKIWADASCKVYIKIGQMGEPYAEYWNNKWSPYTLTAGKVLEIDETFVMDKPTDDTCEFTFHLGGELAATPPYTVYLDDVSLYDPEYTKPVEYILPQPDVRVNQVGYLPEGKKVATVVCNSTQPVKWQLKNAAGVVVLEGYTEPKGLDKDSQDYVHWLDFSDFATEGIGYYFELPTVNSPTNYSHPFDIRKDIYTQMKYDALAFFYHKRSGIPIEMPYAGGEQWTRPAGHIGIEPNKGDTNVPTWPQDDEYAGIPQKNYTKDVTGGWYDAGDHGKYVVNGGIAVW…
29	Lytic transglycosylase A	Peptidoglycan lytic exotransglycosylases	4.2.2.n1	Murein glycan strands and insoluble, high-molecular weight murein sacculi	Escherichia coli str. K-12 substr. MG1655	GH102	38.34	MKGRWVKYLLMGTVVAMLAACSSKPTDRGQQYKDGKFTQPFSLVNQPDAVGAPINAGDFAEQINHIRNSSPRLYGNQSNVYNAVQEWLRAGGDTRNMRQFGIDAWQMEGADNYGNVQFTGYYTPVIQARHTRQGEFQYPIYRMPPKRGRLPSRAEIYAGALSDKYILAYSNSLMDNFIMDVQGSGYIDFGDGSPLNFFSYAGKNGHAYRSIGKVLIDRGEVKKEDMSMQAIRHWGETHSEAEVRELLEQNPSFVFFKPQSFAPVKGASAVPLVGRASVASDRSIIPPGTTLLAEVPLLDNNGKFNGQYELRLMVALDVGGAIKGQHFDIYQGIGPEAGHRAGWYNHYGRVWVLKTAPGAGNVFSG
30	PaCel6A (GH6-2)	Cellobiohydrolases	3.2.1.91	Avicel and carboxymethyl cellulose	Podospora anserina	GH6	70	MAKRLLLTAALAATTLAAPVIEERQNCGSVWSQCGGQGWTGATCCASGSTCVAQNQWYSQCLPGSQVTTTAQAPSSTRTTTSSSSRPTSSSISTSAVNVPTTTTSAGASVTVPPGGGASSTASYSGNPFLGVQQWANSYYSSEVHTLAIPSLTGPMATKAAAVAKVPSFQWMDRNVTVDTLFSGTLADIRAANRAGANPPYAGIFVVYDLPDRDCAAAASNGEWAIADGGAAKYKAYIDRIRHHLVQYSDIRTILVIEPDSLANMVTNMNVPKCQGAANTYKELTVYALKQLNLPNVAMYLDAGHAGWLGWPANIGPAAELFAGIYKDAGRPTSLRGLATNVANYNGWSLSSAPSYTTPNPNFDEKRFVQAFSPLLTAAGFPAHFITDTGRSGKQPTGQ…
31	PaCel6C (GH6-4)	Cellobiohydrolases	3.2.1.91	Avicel, crystalline cellulose and carboxymethyl cellulose	Podospora anserina	GH6	39	MKITSSAAALALVASAVAAPSPTTQDKPTKRQAGCASAVSLNAQTNVFKQYTLHANNFYRKEIEELAIPNLSDPSLEAAARKVADTGSFVWLDTIANVDRLEPALAEVPCNEILGVVVYDLPGRDCAAKASNGELKVGELNRYKTEFIDRIASILKAHPNTAVALVIEPDSLPNLVTNSDVQACRNSAAGYRDGVAYALKTLNLPNVVQYIDAGHGGWLGWDANLKPGAEELAKAYKAAGSPKQFRGIATNVAGWNAWDLSPGEFSSASDAKYNSCQNERTYVNTFGQRLKAAGMPNHAIVDTGRNGVQGLREEWGNWCNVDGAGFGRPPSADTGLELADAFVWVKPGGESDGTSDSSAVRYDSFCGKPDAFQPSPEAGAWHQEYFEMLLRNSNPSLL
32	-	Carbohydrate Binding Module	-	Linear 1,3-β-glucans with occasional decorations of 1,6-β-glucose side-chains	Clostridium thermocellum	GH16	19.5	MYKRLLSSVLIIMLLLSAWSPISVQASDGINDIRGHWAEEDLNKWMEKGILVGYQDGTIRPDNNITRAEFVTLINKVFGLYELSREQFADVEDSKWYSREILKARAAGYIAGYGSNVFKPDNYITRQEAVVIIAKVFELQSGSNYTSKFKDGSLVKEYAKDSVSALVEKGYIAGYEDGTFRPDNYITRAETIKILNKIIPSLYNEKGDYKNEEVAGNALINTEGVILKDTVINGDLYLAQGIQNGDVTLDGVNVKGTVFVNGGGSDSIHFINTKINRVVVNKTGVRIVTSGNTSVESVVVKSGAKLEEKELTGDGFKNVTVDSQLSAGNEIIFVGDFEQVDVLADDALLETKEAKMKLRIFGQRIKVNGKAIEKSSKNYIVNGELISTEEEPGPSDAPG…
33	-	Carbohydrate Binding Module	-	Undecorated linear 1,3-β-glucans or decorated with 1,6-β-glucose side-chains	Ruminococcus flavefaciens	GH16	19.97	MKKYRLFAAVSALAMLAGCSSGNTSSTSESTSSEAVTEVSQEETTAAAAEEDVPEIEGYDLLWHDEFSGDALDETIWNYEPHEPGWTNEELQEYTTSTDNVFVRDGNLVIKAIKSEKDGKDYYTSGKVTAQNKKDFTYGKVVARAKVPEGQGLWPAIWMMPQDESYYGQWPKCGEIDIMEVLGSDVKTAYGTLHYGEPHGEQQGTVVLDSGSFADDFHEYSVEWEPGEMRWYIDGELYLTVNDWFTAVQGEDEKPYPAPFDQPFFVQMNLAVGGTWPGNPDETTDFDKAEFEVDYVRVYQKPEYDTNVTKPEKHYREALEDGNFVYNGDFAEAEDLTDDENWKFLLFEGGKGAAEIRDNMIVITTEDEGTVDYSVQLVQPEMPIIKGKKYRVTFDAWAD…
34	α-galactosidase	α-galactosidases	3.2.1.22	α-galactose from decorated polysaccharides	Bacteroides ovatus	GH95	93.18	GCIQAQEQKSSVPEYKLWYDCPAQVWTEALPLGNGRLGAMVYGTPGTEQIQLNEESIWAGRPNNNANPNALEYIPKVRELVFAGKYLEAQTLATEKVMAKTNSGMPYQSFGDLRIAFPGHTRYSNYYRELSLDSARAIVRYEVDGVQYQRETITSFTDQVVMVRLTANRPGQITFNAQLTSPHQDVMIASEEGNCVTLSGVSSLHEGLKGKVEFQGRLTAKNKGGKIACADGILSVEKADEAVIYVSIATNFNNYQDITGNQTERAKNYLAKAMVHPFIESKKNHVDFYRQYLTRVSLDLGRDQYANVTTDKRVENFKNTNDTHLVATYFQFGRYLLICSSQPGGQPANLQGIWNDKLFPSWDSKYTCNINLEMNYWPSEVTNLSELNEPLFRLIKEVS…
35	α-glucuronidase	Glucuronidases	3.2.1.139	Glucuronic acid from the xylan backbone	Bacteroides ovatus	GH67	82.46	DGSALWLRYASGAKAEITSKKQSPTLRIAVSELQNFWQGGIPVTLEVRNNKELRALGNEGYTIQTSKGGNQITIASSGEQGVLYGTYHLLRLQATGQLPESALQSLNISERPDYRIRILNHWDNLDGTIERGYAGHSLWKWDELPSVVSPRYEAYARANASIGINATVINNVNASPKILSNDYLQKVKVLADVFRPYGLKIYLSINFSSPAALGGLSTSDPLNKEVIDWWKQKAKEIYSLIPDFGGFLVKANSEGQPGPCDYGRTHAEGANMLADVLRPYHGIVMWRAFVYSPTDSDRAKQAYLEFEPLDGKFRDNVIVQIKNGPIDFQPREPFSPLFGAMKKTAVMPEFQITQEYLGFSNHLAFLAPMWKECLDSDTYLQGKGSTVARVTDGSLFSHP…
36	Levanase	Levanases	3.2.1.80	Levans	Bacillus subtilis	GH32-CBM66	76.74	MKRGAKEQMKKRLIQVMIMFTLLLTMAFSADAADSSYYDEDYRPQYHFTPEANWMNDPNGMVYYAGEYHLFYQYHPYGLQWGPMHWGHAVSKDLVTWEHLPVALYPDEKGTIFSGSAVVDKNNTSGFQTGKEKPLVAIYTQDREGHQVQSIAYSNDKGRTWTKYAGNPVIPNPGKKDFRDPKVFWYEKEKKWVMVLAAGDRILIYTSKNLKQWTYASEFGQDQGSHGGVWECPDLFELPVDGNPNQKKWVMQVSVGNGAVSGGSGMQYFVGDFDGTHFKNENPPNKVLWTDYGRDFYAAVSWSDIPSTDSRRLWLGWMSNWQYANDVPTSPWRSATSIPRELKLKAFTEGVRVVQTPVKELETIRGTSKKWKNLTISPASHNVLAGQSGDAYEINAEFK…
37	Levanase	Levanases	3.2.1.80	Levans	Bacillus subtilis	GH32	58.9	MKRGAKEQMKKRLIQVMIMFTLLLTMAFSADAADSSYYDEDYRPQYHFTPEANWMNDPNGMVYYAGEYHLFYQYHPYGLQWGPMHWGHAVSKDLVTWEHLPVALYPDEKGTIFSGSAVVDKNNTSGFQTGKEKPLVAIYTQDREGHQVQSIAYSNDKGRTWTKYAGNPVIPNPGKKDFRDPKVFWYEKEKKWVMVLAAGDRILIYTSKNLKQWTYASEFGQDQGSHGGVWECPDLFELPVDGNPNQKKWVMQVSVGNGAVSGGSGMQYFVGDFDGTHFKNENPPNKVLWTDYGRDFYAAVSWSDIPSTDSRRLWLGWMSNWQYANDVPTSPWRSATSIPRELKLKAFTEGVRVVQTPVKELETIRGTSKKWKNLTISPASHNVLAGQSGDAYEINAEFK…
38	α-1,2-L-fucosidase	Fucosidases	3.2.1.51	1,2-α linkages and 1,3-α linkages of fucose carbohydrates	Bifidobacterium longum subsp. infantis ATCC 15697 = JCM 1222	GH95	88.2	MKLTFDGISSHWEEGIPFGNGRMGAVLCSEPDADVLYLNDDTLWSGYPHAETSPLTPEIVAKARQASSRGDYVSATRIIQDATQREKDEQIYEPFGTACIRYSSEAGERKHVKRSLDLARALAGESFRLGAADVHVDAWCSAPDDLLVYEMSSSAPVDASVSVTGTFLKQTRISSGSDSDARQATLVVMGQMPGLNVGSLAHVTDNPWEDERDGIGMAYAGAFSLTVTGGEITVIDDVLQCSGVTGLSLRFRSLSGFKGSAEQPERDMTVLADRLGETIAAWPSDSRAMLDRHVADYRRFFDRVGVRLGPAHDDDEEVPFAEILRSKEDTPHRLETLSEAMFDFGRYLLISSSRPHTQPSNLQGIWNHKDFPNWYSAYTTNINIEMNYWMTGPCALKEL…
39	Alginate lyase	Alginate lyases	4.2.2.11	Alginates	Agarivorans sp. JAM-A1m	PL7	36.91	MKIKTLVVMMLGALSTSLSAATTTPAEVLDLSCWKVTLPVSLDNGDRPTEFSEKEIAKGAMHEDYFYVNEAKDGVVFRSPIQGIKTSKNTKYVRSELREMMRCGDTSHKTKGVNGNNWVFSHNESAESLKNAAGVDGNLKATLSVDHVTSTGEIWQQGRVIIGQIHAPDDEPVKIYYRKLPNHETGSVWISHEPNGGDDIIFPMIGPTKPNYWKQKDKDIPKSYNDGIALGEKFSYEIDINGSDMTVTISREGKADVVQKVDMQNSGYGLKDQWMYFKAGVYNQNRSGNPEDYVQATFYSLDVNHGSAK
40	α-1,3-3,6-anhydro-L-galactosidase	Agarases	3.2.1.-	Agarose oligosaccharides	Bacteroides plebeius DSM 17135	GH117	44.98	MRKIIFAAGMMSLLAACGNTGNTQTIAVDDTQNYDERKADSLGIPKGNKLSAAMKRAMKWENHDNKWFFEYKMEPLKGDLAYEEGVVRRDPSAMLKIGDTYYVWYSKSYGPTQGFAGDIEKDKVFPWDRCDIWYATSKDGLTWKEQGIAVKRGEKGAYDDRSVFTPEVMEWKGKYYLCYQAVKSPYTVRVKNTIGMACADSPEGLWTKTDKPVLEPSDTGEWEGDEDNRFKVVSKGDFDSHKVHDPCIIPYNGKFYMYYKGERMGEEITWGGREIKHGVAIAENPMGPYVKSEYNPISNSGHEVCVWPYKGGIASLITTDGPEKNTLQWSPDGINFEIMSVVKGAPHAIGLNRSADAEKEPTEILRWGLTHIYNSSDYQSIMRFSTWTLQTHTAKGESK…
41	Alginate lyase	Alginate lyases	4.2.2.3	Polyguluronate and polymannuronate	Sphingomonas sp. A1	PL5	44.19	MPLACLATTRVGAAREKSGDSSMFDIPFPGHGRRLAVAALAFAGCAFAGSLQAHPFDQAVVKDPTASYVDVKARRTFLQSGQLDDRLKAALPKEYDCTTEATPNPQQGEMVIPRRYLSGNHGPVNPDYEPVVTLYRDFEKISATLGNLYVATGKPVYATCLLNMLDKWAKADALLNYDPKSQSWYQVEWSAATAAFALSTMMAEPNVDTAQRERVVKWLNRVARHQTSFPGGDTSCCNNHSYWRGQEATIIGVISKDDELFRWGLGRYVQAMGLINEDGSFVHEMTRHEQSLHYQNYAMLPLTMIAETASRQGIDLYAYKENGRDIHSARKFVFAAVKNPDLIKKYASEPQDTRAFKPGRGDLNWIEYQRARFGFADELGFMTVPIFDPRTGGSGTLLA…
42	α-1,6-mannanase	α-Mannanases	3.2.1.101	1,6 linkages in α-mannans	Bacillus circulans TN31	GH76	41.79	MSLRSGQLFRFLAVPLAIALMLGSMPGIGTSKAYAYTASDGDTAMKAFNDTFWDPNAKMFWKDSKREKHQDFWVEAELWELVMDAYQHTSDPALKAELKTQIDDVYDGTVAKYGQDWTNNPFNDDIMWWAMGSARAYQITGNPRYLEAARDHFDFVYDTQWDEEFANGGIWWLNSDHNTKNACINFPAAQAALYLYDITKDEHYLNAATKIFRWGKTMLTDGNGKVFDRIEIEHGAVPDATHYNQGTYIGSAVGLYKATGNAVYLDDAVKAAKFTKNHLVDSNGVLNYEGPNGDLKGGKTILMRNLAHLQKTLDETGQYPEFSAEFDEWLAFNIEMAWSHRNSDHIVDGNWAGQLLSGTYESWSSAAAVQALNGIKPMEAELHYGVKNPFDKIEAERYN…
43	α-1,3-glucanase	α-Glucosidases	3.2.1.59	1,3-α-glucan	Bacillus circulans KΑ-304	GH87	63.02	MRTKYVAWSLIAALLITTLFQSVGPGEPVEAAGGPNLTLGKTITASGQSQTYSPNNVKDSNQGTYWESTNNAFPQWIQADLGASTSIDQIVLKLPANWETRTQTLTVQGSSNGSTYSTIVGSANYVFNPAVAGNSVTINFDPTSTRYVRLQVTNNTGWPAAQLSEFEIYGASGPTPTPSATPQPSGTYQAEAAALSGGAKVNTDHSGYAGTGFVDGYWTQGAATTFTVQAQAGGNHNVTLKYANASGSDKTLSLYVNGTKLRQTNLPNLANWDTWGNKAETVNLNAGSNTIAYKYDSGDSGNVNLDQITVEAASSTPTPTPTSTPTPTPTPTPTPTPTPTPTPTPTPTPTATPTPPPGSNIAVGKPITASSSTFTFVAANANDNSTDTYWEGGGNPSTL…
44	β-galactosidase	β-Galactosidases	3.2.1.23	β-D-galactosides	Bacillus subtilis subsp. subtilis str. 168	GH42	82.26	MMSKLEKTHVTKAKFMLHGGDYNPDQWLDRPDILADDIKLMKLSHTNTFSVGIFAWSALEPEEGVYQFEWLDDIFERIHSIGGRVILATPSGARPAWLSQTYPEVLRVNASRVKQLHGGRHNHCLTSKVYREKTRHINRLLAERYGHHPALLMWHISNEYGGDCHCDLCQHAFREWLKSKYDNSLKTLNHAWWTPFWSHTFNDWSQIESPSPIGENGLHGLNLDWRRFVTDQTISFYENEIIPLKELTPDIPITTNFMADTPDLIPYQGLDYSKFAKHVDAISWDAYPVWHNDWESTADLAMKVGFINDLYRSLKQQPFLLMECTPSAVNWHNVNKAKRPGMNLLSSMQMIAHGSDSVLYFQYRKSRGSSEKLHGAVVDHDNSPKNRVFQEVAKVGETL…
45	Pectate lyase	Pectate lyases	4.2.2.2 4.2.2.9	Polygalacturonic acid (PGA)	Bacillus licheniformis 14A	PL1	39.22	MKKLISIIFIFVLGVVGSLTAAVSAEAASALNSGKVNPLADFSLKGFAALNGGTTGGEGGQTVTVTTGDQLIAALKNKNANTPLKIYVNGTITTSNTSASKIDVKDVSNVSIVGSGTKGELKGIGIKIWRANNIIIRNLKIHEVASGDKDAIGIEGPSKNIWVDHNELYHSLNVDKDYYDGLFDVKRDAEYITFSWNYVHDGWKSMLMGSSDSDNYNRTITFHHNWFENLNSRVPSFRFGEGHIYNNYFNKIIDSGINSRMGARIRIENNLFENAKDPIVSWYSSSPGYWHVSNNKFVNSRGSMPTTSTTTYNPPYSYSLDNVDNVKSIVKQNAGVGKINP
46	α-L-fucosidase	Fucosidases	3.2.1.51	Fucosyl-α-1,6-N-acetylglucosamine	Lactobacillus casei BL23	GH29	41.31	MNDNVAWFKQAKYGMMIHWGLYSLLAGEYRGESSSAYAEWIQSKFQIPNAEYGNLATAFNPLYFDAKKIVALAKQCGMQYLVVTTKHHDGFAMYHSKVDAYNVYDATPFHRDIIGELAEACQKAGLKFGLYYSQDLDWHDPNGGGYKSNDVETAGTTWDNSWDFPDEDQKNFDLCFDNKILPQIKEIMSNYGDIATAWFDVPMTLSEAQSQTIYDTVRELQPNCLINSRLGNGKYDFVSLGDNEIPKNKEDMNKTDVDYNEITGFKPSPLGLYETAGTINDSWGFSYHDQNWKTPRTLYRYKQHLNDFGINYLLNVGLDPLGRVPMMAEENLLAAKALEDEANR
47	α-mannosidase	α-Mannosidases	3.2.1.113	1,2-α-mannobiose on Man9GlcNAc2	Caulobacter sp. K31	GH47	50.55	MTASHLSRRHALALVASAAAAPAFAAETTPEDWKALAADVRSEFQWAWQGYVAKAWGKDEINPVSGTSRSFFIEGHDLGLSLVEALDTLWIMGLDAEFQAGVDWVKANLSFDVDGNAQVFETNIRLVGGLLSAHLASGDPVLLAKARDLADRLAKAFEASPHGLPWRYVNLRTGAVSDPETNLAEIGTYLSEFGVLSQLTGERKYFDMAKRAMRHTLDRRSKIGLMAANIHAMTGAFTSRNASIDVYADSFYEYLWDAWALFGDEDCKRWAVECVDAQLAHQAKRYDGRLWFPMVDFETGAVTGTAQSELAAYYAGLLGQVGRKAQGDDYLASFTYLQATFGVIPESIDVTTGQPRRKHTGLRPEYPDACLNLWLIDRDPRYRRLAAIHYREMKATSRA…
48	Endo-β-1,3-glucanase	Laminarinases	3.2.1.39	1,3-β-glucans	Arthrobacter sp. NHΒ-10	GH55	64.56	MTLSTTIPGVGRRARRARAVGAGVTALAAAATGVALAAPATAEPAPDPDLGPNVVFIDDSWSVDQINTYLASINDEAEFSQDRHAVFFEPGVYGDASGEDDPATATGIVNAEVGYYTAIAGLGAQPDDVLINGALSVQPVVSCPNNPWSCQDPGSLTRFWRSLSNVAVNPIQRPVDEDVTRPFPAGITDPHQLRFAVSQAAPLRRVDIQGDLTVFGRFGEYASGGYLANSRVSGRLVTGSQQQWYTRNSEVGTWDGGVWNMVFSGVEGAPATDFGPKPDGTTGSKTTLDTTPLSREAPFLFRDGEDLAVFVPNARTETRGVDWSTDADAGQKLSLDTFFVAHEGDSAAEINAALATGKNLLLTPGVYHLDEAIRVENPDTVVLGLGYASLAPTSGSAAL…
49	Keratan sulfate hydrolase / Keratanase II	Acetylglucosaminidases	3.2.1.-	Cartilage keratan sulfate and cornea keratan sulfate	Bacillus circulans KST202	GH111	69.07	MSSRLKRKCSMLLTFTMIFQLLGLFLFKGEIVSASIRQDPTTGNYYKNVPLVGADFDDASNSNIVAKGTWDDNTAPLNTFFVDKGTATDGGFTTARITTVTDQVYEGGSLQFGDGSTYPINLNYKVDGLEVGATYRLSAYMKLFPGYPAKGGQFGVKNHDTANYTTGGETKSVNFSTVTADWKEYSVTFTPTYPHAKIFFWGSNNLPKVLVDKLRLEKVLEHPGPAAPAVTADDVNNIVVGIDETMEYNINGAGWVAYKEYAKPDLKGDLIVQIRVKETLNTLAGEVTTLTFTAQNDPAPGQPEQLLLKDGDFEAGAASVTTDTNVQNQFFSKNNQYEIVTGDTASGQYALKLRSPETIGYHKTDLKPSTKYQISFMAKVGSASQKLSFRISGYKNDNP…
50	Glucuronyl esterase 15A	Glucuronyl esterases	3.1.1.-	Glucuronyl crosslinks between hemicelluloses and lignin	Zobellia galactanivorans	GE	47.25	MAQPEANYDETKVPKFTVPDPLLTFSGEAITDSDQWEEKRKLEIYQFFEKQIYGKVPAMLDEYSFEVIEEDNNALGGKAQRKQIAVGLKKNNRSLNFNILLYLPKGNENAPVFLGYNFHGNHTVTDDPKVIITKAWNANDIALNIQNNKATEASRGSRKNRWAIDKILDNGFGLATVYYGEIDPDKNDFSDGLHSLFYREGQTRPKTNEWGSIAAWAFGLSRAMDYLENDTNISKVIVFGHSRLGKAALWAGASDPRFDGVISNNSGCGGAALSKRKYGETIGHINNSFPHWFSESFKKYSNKEEILPVDQHQLLALIAPRPLYVASAAEDEWADPKGEFLSAQYATPVYALYGKKGISKSDSPVVDRPIQETLAYHIRSGKHDVTDYDWDQYISWAQN…
51	Feruloyl esterase	Feruloyl esterases	3.1.1.73	Ferulate crosslinks between hemicelluloses and lignin	Thermoanaerobacter mathranii subsp. mathraniistr.A3	FAE	31.44	MQKHVEFTYNGKTLRGMMHLPHGIHGKVPMVAIFHGFTGNKMEPHFIFVKLSRQLEKVGIASVRFDFYGSGESDGDFSEMTFSGELEDARQIIKFIKNEPMTDVENIGILGLSMGGAVAGVIASELKEEIKALVLWAPAFNMPELILEQSKNADEKMREILEREGIIDIGGLALSKEFIDDLTKLNIFELSKGYDKPVLIVHGTEDAAVKYEVSDKILEEVYRGNAKRITIEGADHTFNKLEWEKKAIEESVNFFKENLKG
52	β-1,3-glucanase B	Laminarinases	3.2.1.39	Insoluble 1,3-β-glucan	Lysobacter enzymogenes N4-7	GH64	41.87	MVTRRTFLGASAAALAAPLLPRGALAATPARFNLALLNASGQNTAYAYVTGFDNGRPLFVRADGSAYYPPSPSAPVTPLGADCAIPLGANGSTVRVSVPRMYGARIYLVTGSRLDFYVNPGPAVVHPSFLNTSDTNFNKNWTFAEFTFNEYELFSNISYVDFVAAPLGLSLRSLSGRVETIPGLPAASLDPICYSLQQQASQEGSAWNSLIQRGPDGRNLRAMSAHYQAARFQNYLAGYIDACWNKYRGTTLTVDTQSGFGVLTARVGGDNLLRFNNGEAFAKPSTADVLSCDSGPFSLGGASEVRKAIIPRLAAALNRTTLLDNPNQPNGEVASRFYRNAQTNHYARLVHERLPDNRGYAFPYDDVTASGGPDFSGAARSGDPDTLTVTLRALR
53	α-L-rhamnosidase	Rhamnogalacturonases	3.2.1.40	p-nitrophenyl α-L-rhamnopyranoside	Sphingomonas paucimobilis FP2001	GH106	122.8	MIRKPLRLAALLACAASFAVPSWADELADGFHNPPQSARPRVWWHWMNGNVTKDGISKDLDWMQRVGIGGVQNFDANLSTPQIVPERLIYMTEQWKDAFRHAVREADARGLEFAIAVSPGWSETGGPWVKPEDAMKKLVWAEADLRGGQRLKGALPAPPSITGPFQSAQFHEALPGGAEMQTLPAFYRDARVLAYSLVPKALPRPAVSEGDGSPVDAAPLLDGDLETVARIGKGDAARPGTMVLDYGKPVTVRSASLFVPHARPPFGDPDYRPALEVEQDGGWRRIGAFPLTEVATTISFAPVTGRRFRLVLAPNDAPRAPGLGEGAPGAITMDVFARPQSDTLAIGDFRLLAEARIDRFEAKAGFALVSDYNALAEKSAADLPAIDPAKVVDLTDRLR…
54	β-galactosidase	β-Galactosidases	3.2.1.23	β-galactosides	Thermotoga maritima MSB8	GH42	89.98	MLGVCYYPEHWGTEKVEEDFRRMKELGIEYVRIGEFAWSRIESERGKFNWDWLDKTLELAEKMGLKIVLGTPTATPPKWLIDEHPEILPVDKDGRVKNFGSRRHYCFSSPVYREEVKRIVTIIVKRYGKHPAVAGWQTDNEYGCHDTVRCYCPRCKKAFQKWLERKYEGDIKKLNEAWGTVFWSQEYRSFDEIELPNLTPADPNPSHLLDYYRLASDQVVEFNKLQVEIIREYSPGRFITHNFMSGFTDFDHYKLSKDLDFATWDNYPLGHTLVFLRMKGETKNPFDRVGHPDIISFSHDLYRGVGRGRFWVMEQQAGPVNWAPYNLWPAKGAVRLWTWQAFAHGAEVVSYFRWRQAPFAQEQMHSGLLAPDSAPYPGYHEVKQVFEELKNIDINEPVE…
55	Lytic transglycosylase	Peptidoglycan lytic exotransglycosylases	4.2.2.n1	1,4-β-glycosidic bonds between N-acetylmuramic acid and N-acetylglucosamine residues	Escherichia coli K-12	GH23	20.63	MKLRWFAFLIVLLAGCSSKHDYTNPPWNAKVPVQRAMQWMPISQKAGAAWGVDPQLITAIIAIESGGNPNAVSKSNAIGLMQLKASTSGRDVYRRMGWSGEPTTSELKNPERNISMGAAYLNILETGPLAGIEDPKVLQYALVVSYANGAGALLRTFSSDRKKAISKINDLDADEFLEHVARNHPAPQAPRYIYKLEQALDAM
56	Exo-polygalacturonase	Polygalacturonases	3.2.1.67	Polygalacturonic acid (PGA)	Thermotoga maritima MSB8	GH28	49.59	MIMEELAKKIEEEILNHVREPQIPDREVNLLDFGARGDGRTDCSESFKRAIEELSKQGGGRLIVPEGVFLTGPIHLKSNIELHVKGTIKFIPDPERYLPVVLTRFEGIELYNYSPLVYALDCENVAITGSGVLDGSADNEHWWPWKGKKDFGWKEGLPNQQEDVKKLKEMAERGTPVEERVFGKGHYLRPSFVQFYRCRNVLVEGVKIINSPMWCVHPVLSENVIIRNIEISSTGPNNDGIDPESCKYMLIEKCRFDTGDDSVVIKSGRDADGRRIGVPSEYILVRDNLVISQASHGGLVIGSEMSGGVRNVVARNNVYMNVERALRLKTNSRRGGYMENIFFIDNVAVNVSEEVIRINLRYDNEEGEYLPVVRSVFVKNLKATGGKYAVRIEGLENDY…
57	Keratan-sulfate endo-β-galactosidase / Keratanase	β-Galactosidases	3.2.1.103	Internal endo-β-galactosyl linkages in keratan sulfate and glycoconjugates with N-acetyl-lactosamine repeating units	Sphingobacterium multivorum	GH16	33.62	MRKTKFWLVLSLIATSLSIFACKKDSTATKNPIPEVSKAKASTKLLNATTVATTDYELIWSDEFNSSGGFDSTKWSYADRGTVAWNKYMTSLPAYASQDGSNLVLRMDNAVVAGDPVAYHAGGVKSMGKFSMTYGKVEVRAKFTQGRGSWPAIWMMPEPATAYGGWPSCGEIDSMEHVNNESVMYHTIHNGSVTNANGGSTASKSATYNTTDYNLYTMIWSPNDIRFYVNNSLQYTYARVSGGGTQQWPFDVPFYLILNQAGGAGWPGAITNADLPFSMQVDYVRVYKLPLFSNGDFESGVIYPWTTWGGGSSVVSTDARTGTKCIRETGGETSIEQYLTGLTPNTTYRFGGYAKVSAAGQSVSIGVKNYGGTAVDATIGTTSYSNNSVTFTTGANNTT…
58	Rhamnogalacturonate lyase	Rhamnogalacturonan lyases	4.2.2.-	Rhamnogalacturonan	Dickeya dadantii 3937	PL4	34.44	MHMNKPLQAWRTPLLTLIFVLPLTATGAVKLTLDGMNSTLDNGLLKVRFGADGSAKEVWKGGTNLISRLSGAARDPDKNRSFYLDYYSGGVNEFVPERLEVIKQTPDQVHLAYIDDQNGKLRLEYHLIMTRDVSGLYSYVVAANTGSAPVTVSELRNVYRFDATRLDTLFNSIRRGTPLLYDELEQLPKVQDETWRLPDGSVYSKYDFAGYQRESRYWGVMGNGYGAWMVPASGEYYSGDALKQELLVHQDAIILNYLTGSHFGTPDMVAQPGFEKLYGPWLLYINQGNDRELVADVSRRAEHERASWPYRWLDDARYPRQRATVSGRLRTEAPHATVVLNSSAENFDIQTTGYLFSARTNRDGRFSLSNVPPGEYRLSAYADGGTQIGLLAQQTVRVE…
59	Endo-rhamnogalacturonan lyase	Rhamnogalacturonan lyases	4.2.2.23	Rhamnogalacturonan	B. subtilis subsp. subtilis str. 168	PL11	77.88	MRRSCLMIRRRKRMFTAVTLLVLLVMGTSVCPVKAEGAARQMEALNRGLVAVKTDGGIFVSWRFLGTENASVLFNVYRDGQKLNAAPVKTTNYVDKNGSAGSTYTVRAVVNGTEQPASEKASVWAQPYHSVPLDKPAGGTTPKGESYTYSANDASVGDVDGDGQYELILKWDPSNSKDNSQDGYTGDVLIDAYKLDGTKLWRINLGKNIRAGAHYTQFMVYDLDGDGKAEVAMKTADGTKDGTGKVIGNANADYRNEQGRVLSGPEYLTVFQGSTGKELVTANFEPARGNVSDWGDSYGNRVDRFLAGIAYLDGQRPSLIMTRGYYAKTMLVAYNFRDGKLSKLWTLDSSKSGNEAFAGQGNHNLSIADVDGDGKDEIIFGSMAVDHDGKGMYSTGLGH…
60	α-1 2-mannosidase / Mannosyl-oligosaccharide α-1,3-mannosidase	α-Mannosidases	3.2.1.-	Mannosyl-oligosaccharides	Bacteroides thetaiotaomicron	GH92	86.74	MKLKTLLIGCFGGFIMLNSCTESPSVKDYSAYVNPFIGTGGHGHTFPGAVVPHGMIQPSPDTRIDGWDACSGYYYDDNTINGFSHTHVSGTGCCDYGDVLLMPTVGKPQYLTTDPESQKLAYASAFSHENETAEPGYYSVFLDTYQVKAEITATKRGAIHRYTFPESTESGFIIDLDYSLQRQTNYEMEIEVISDTEICGHKKTTYWAFDQYINFYAKFSKPFAYTLITDSVTMDNGKRLPVCKAVLHFNTKKDEEVLVKVGVSAVDIAGARKNVESEIPEWDFDKVRKDARTAWNNYLSKIDITTSDKEDKTIFYTALYHTAISPNLFTDADGRYLGMDLEVHQGDTINPLYTVFSLWDTFRALHPLMTIIDPNLNNQFINSLIRKHQEGGIYPMWDL…
61	Rhamnogalacturonan lyase	Rhamnogalacturonan lyases	4.2.2.-	Rhamnogalacturonan	Bacteroides thetaiotaomicron	PL11	68.38	QPNYDFTKLKREHLGRGVIAIRENPSTVVVSWRYLSSDPMDESFDIYRDGKKVNKHPLKNATFFQDSYQGTEPALYTVKAIKGKTESNYQLPADAPTGYLNIPLVRPEGGTTPSGQAYTYAPNDASIGDVDGDGEYEIILKWDPSNAHDNAHDGYTGPVIFDCYKLNGQQLWRINMGRNVRAGAHYTQFMVFDLDGDGRAEVVMKTGDGTVDGTGKVIGDANADYRNERGRILTGPEYLTIFNGLTGEAMQTIDYVPERGNLMDWGDGRANRSDRYLACIAYLDGVHPSVVMCRGYYTRTVLAAYDWDGKNLKNRWVFDSNNPGCRAYAGQGNHNLRVGDVDGDGCDEIVYGQCTINNDGTGLYSTRMGHGDAMHLTHFDPSRPGLQVWSCHENRRDGS…
62	α-galactosidase A	α-Galactosidases	3.2.1.22	Galactose containing carbohydrates	Escherichia coli str. K-12 substr. MG1655	GH4	65.16	MMSAPKITFIGAGSTIFVKNILGDVFHREALKTAHIALMDIDPTRLEESHIVVRKLMDSAGASGKITCHTQQKEALEDADFVVVAFQIGGYEPCTVTDFEVCKRHGLEQTIADTLGPGGIMRALRTIPHLWQICEDMTEVCPDATMLNYVNPMAMNTWAMYARYPHIKQVGLCHSVQGTAEELARDLNIDPATLRYRCAGINHMAFYLELERKTADGSYVNLYPELLAAYEAGQAPKPNIHGNTRCQNIVRYEMFKKLGYFVTESSEHFAEYTPWFIKPGREDLIERYKVPLDEYPKRCVEQLANWHKELEEYKKASRIDIKPSREYASTIMNAIWTGEPSVIYGNVRNDGLIDNLPQGCCVEVACLVDANGIQPTKVGTLPSHLAALMQTNINVQTLL…
63	α-galactosidase	α-Galactosidases	3.2.1.22	Substrates with galactopyranoside as the glycone	Thermotoga maritima MSB8	GH36	64.52	MICVEIFGKTFREGRFVLKEKNFTVEFAVEKIHLGWKISGRVKGSPGRLEVLRTKAPEKVLVNNWQSWGPCRVVDAFSFKPPEIDPNWRYTASVVPDVLERNLQSDYFVAEEGKVYGFLSSKIAHPFFAVEDGELVAYLEYFDVEFDDFVPLEPLVVLEDPNTPLLLEKYAELVGMENNARVPKHTPTGWCSWYHYFLDLTWEETLKNLKLAKNFPFEVFQIDDAYEKDIGDWLVTRGDFPSVEEMAKVIAENGFIPGIWTAPFSVSETSDVFNEHPDWVVKENGEPKMAYRNWNKKIYALDLSKDEVLNWLFDLFSSLRKMGYRYFKIDFLFAGAVPGERKKNITPIQAFRKGIETIRKAVGEDSFILGCGSPLLPAVGCVDGMRIGPDTAPFWGEHI…
64	α-glucuronidase	Glucuronidases	3.2.1.139	Glucuronic acid from the xylan backbone	Thermotoga maritima MSB8	GH67	93.13	MDYRMCWLEYRGLPADVAGKLKDWFSSVSILEPGSSVLKDEIRRFSERSIGITPRFYSRPLKKEKYIMVGRLESLPIKLDVNLGEEGFMLRTIEWNGSKILLVTGETKKALVYGIFDLMKRIRLGEDIEKMNVLAKPKAKFRMLNHWDNLDGTIERGYAGNSIFFKDNRIIINQRTKDYARLLASIGINGVVINNVNVKKREVYLIDSIYLKKLKKLADIFREYGIKIYLSINFASPVYLGGLDTADPLDERVARWWREKARGIYDYIPDFGGFLVKADSEFNPGPHMFGRTHAEGANMLARALAPFGGVVIWRAFVYNCLQDWRDYKTDRAKAAYDNFKPLDGQFDDNVIIQIKYGPMDFQVREPVNPLFGGMEKTNQILELQITQEYTGQQIHLCFL…
65	α-glucuronidase	Glucuronidases	3.2.1.139	Glucuronic acid from the xylan backbone	Geobacillus stearothermophilus T-1	GH67	80.45	MTAGYEPCWLRYERKDQYSRLRFEEIVAKRTSPIFQAAVEELQKGLRSMMEIEPQVVQEVNETANSIWLGTLEDEEFERPLEGTLVHPEGYVIRSDVDDGPFRIYIIGKTDAGVLYGVFHFLRLLQMGENIAQLSIIEQPKNRLRMINHWDNMDGSIERGYAGRSIFFVDDQFVKQNQRIKDYARLLASVGINAISINNVNVHKTETKLITDHFLPDVAEVADIFRTYGIKTFLSINYASPIEIGGLPTADPLDPEVRWWWKETAKRIYQYIPDFGGFVVKADSEFRPGPFTYGRDHAEGANMLAEALAPFGGLVIWRCFVYNCQQDWRDRTTDRAKAAYDHFKPLDGQFRENVILQIKNGPMDFQVREPVSPLFGAMPKTNQMMEVQITQEYTGQQKH…
66	Endo-β-1,4-galactosidase	β-Galactosidases	3.2.1.-	β-galactosides	Streptococcus pneumoniae TIGR4	GH98	67.45	MNKEKIKRKLITILFVCIGMLCFGLLAGVKADNRVQMRTTINNESPLLLSPLYGNDNGNGLWWGNTLKGAWEAIPEDVKPYAAIELHPAKVCKPTSCIPRDTKELREWYVKMLEEAQSLNIPVFLVIMSAGERNTVPPEWLDEQFQKYSVLKGVLNIENYWIYNNQLAPHSAKYLEVCAKYGAHFIWHDHEKWFWETIMNDPTFFEASQKYHKNLVLATKNTPIRDDAGTDSIVSGFWLSGLCDNWGSSTDTWKWWEKHYTNTFETGRARDMRSYASEPESMIAMEMMNVYTGGGTVYNFECAAYTFMTNDVPTPAFTKGIIPFFRHAIQNPAPSKEEVVNRTKAVFWNGEGRISSLNGFYQGLYSNDETMPLYNNGRYHILPVIHEKIDKEKISSIFP…
67	β-galactosidase	β-Galactosidases	3.2.1.23	β-galactosides	Vibrio sp. (strain EJY3)	GH2	94.64	MHNSPRSTTLFNDNWLFQLAKDKPNTKQWSTVTLPHDWSVASAFSPQYDGATGYLPGGIGWYKKQFKNPLNKHYSRCILVFDGIYNNATININGYDIHFQAYGYAPFNIEITDYLKSDNVITIHVDRRRYIDSRWYTGSGIYRDIEMVLTKDVFVPIWENHIKASVSSNQIGHIHQQLMIEAKTKTHYLTIVSRLLEPNSDNCVATARTHRSVNNREVCDLELTCDQLSLWSPDSPILYKLETQIYENGCVIDKVSENIGFRSIEFSPEQGFFLNGMPTKVRGVCLHHDGGLVGAAVPDEIWIRRLSKLKQCGVNAIRIAHNPASKRLLHLCDTMGFLVQDEFFDEWDYPKDKRLNMGNQHDDFFSQCYTEHFQTRAKTDLCNTLKCHINHPSIFMWSI…
68	β-agarase	Agarases	3.2.1.81	Agarose and neoagarooligosaccharides	Bacteroides uniformis NP1	GH16	38.71	MELKLLLLSLGFLFISCSSCMPGDNNGEENGSENGSNTDPGDSETEFEYEWDKFPVPVSAGTGMKWELQSQSDDFNYTADSNNKGNFEKKWTDYYHANWSGPAPTIWQRDHISVSDGCLRIETSRPDDVKIVKVTSGDKEKMMPGTYTGCVTSKTRVVYPVYVEAYAKIANSTMASDVWMLSPDDTQEIDIIEAYGSDRVVGDDGHKFYGPDRIHLSHHVFIRDPFQDYQPTDPGSWYKDVNGTIWRNDFHRVGVYWKDPFNLEYYVDGKMVRRVSGKNIIDPNDFTKGTGLSKEMDIIINMEDQSWRAISGLSPTNKELMNKDNNTFLVDWIRIYKPVEDK
69	β-porphyranase	Porphyranases	3.2.1.178	Porphyran	Bacteroides uniformis NP1	GH16	52.56	MKKRISLTNILILCAITFANCNEVIIETGQEESVNNQEGADNNNTEEFPENTFPVSEKIKTIPLPPTGQKWIVNDMFTDDFNASELDESKWINPHPTWKGREPGLFEEERVSFKDGCMVLEGIKMNNPIVVNGTEFNISCAAVVSKEEKAHYGYYECRFKANKTTLSSTFWLSNRSGKFPTDGKQPEGAAPGMFKQELDICECIGRTGDFNGNFFYKGMNSNVHYWFTPEGENVQKDIRAKETRLYREDGGVPSDDFNVYGCWWKDKSSATFYLNNTQSGSVEFYNRDTNDPFYFTEPMGVNMVVETYPYPWIELPSDEELADETMNKTYYDWVRAYTLIDINVETEESQNKVFGNNINITNKENRILKNKENKYSTELIYTADYNCNAVVIIYNKDKK…
70	Agarase	Agarases	3.2.1.81	Agarose and neoagarooligosaccharides	Bacteroides uniformis NP1	GH86	74.29	MKNRIIGLFCFMAVHLAASAQTHVQLNLNVKHKLGDVTEFNRPKFINFHATINENYWDSANKIADLRDDLIRKYDVYVGRETGMIKTVLRNVKEDPERPGFADPDDLARLCSQNKKRYVQNTKVHPYEKYSNLILCNQFSPFYPDGTKTLKGWALSQKDTEDEPFGTASGEFYGRYIKEYFGEGGESGEPKPGFCEVINEPLWDIYDKPKAPKSSITKLFEFHSTIAAQVKKFNPDMKVGGYCTAFPDFELQNFGRWNARWKQFIDIAGKDMDFFTIHLYDFPCKDGKQMYRKGSNMEATMDMIEQYSMIKLGEVKPLMISEYSAQTHDYNRKPWSPYRDWLRLKSTNSMLMQFMERTDNICYAMPFAMLKSEWGYNPKTGLAHTARMLRRENEPESFT…
71	Ulvan lyase	Ulvan lyases	4.2.2.-	Marine polysaccharide ulvan	Pseudoalteromonas sp	PL24	59.42	MKLNLKASGVARQLTTLAKTVAALSVLTACASSNTATVSSAMSKANGVFLESQTKITNGALHFDGKKLNHNTFEKPSLGPEYDYFFGKNISAHGDAVKPYKHYVFMTWYKGGKEQRNVMLSRFNTKTGVVKTIQFPHRHTGFRGNPLVGESHNTIGLAVSPKNGTIHMVYDMHAYVDDDESGRFKGRFVDDFFRYSFSVPGAADVPDDEFTLEKFVKDTSEVSQGTDDFKHLTMTGNLEDKDNFSALTYPKFYKSKEGELLHYMRWGGNNNGAYYFNKYDAEKQVWTRFTPFNHKDQETHGNAYNWGLYGQMKYINGKLRVGFQQRSANNNDRYKYQNGVYYAYSDHPDGLGDWKNVDGENMTWPLVDSDEIKIFEPGDYIDHQEPNSVHIVGGFDWTV…
72	Acetylglucosamine-6-sulfatase	Acetylglucosamine-sulfatases	3.6.1.14	Hydrolysis of the 6-sulfate groups of the N-acetyl-D-glucosamine 6-sulfate units of heparan sulfate and keratan sulfate	Aquimarina agarilytica	Sulfatase	64.39	MNHIYKLVVVGISLISVACAKVEKNKQAQTPPNIVYIMADDHTTQGIGMYESRLAGLNPSPTIDKIGKSGIVFDRCYVTNSICTPSRAAILTGQYSQANGVIDLEGSLPPEKQYLPTEIKKLGYQTAIVGKWHLEEEPEAFDYYCVFPVQGKYFDPEFRVRGPKPWGQNVIKRKGHSSDNVADLTLDWLKNKRDPNKPFLLMPQFKAPHDDFEFAPRYKEYLEDKWIPEPASMYYNANNGSVATRGKNDSLTRVIGSSVSRRNIVRHKGMSTWKDKDWKDFGNAQALKADAYKPFNHNNLEKAHTSRTYQEFVKRYLRCVKGVDDNVKRIMDYLKAEGLLENTVVIYTGDQGFMLGEHDYVDKRWMYEESMRMPLLIQYPKMITPGQRNGALINNTDFT…
73	Putative arylsulfatase 2	Arylsulfatases	3.1.6.1	Phenol sulfate	Aquimarina spongiae	Sulfatase	55.77	MINKNVMKYKFIFTSIFLVTQLIIGQQKPNIVLLFADDAGYSDFGFQGSKIMKTPNLDKLARRGVIFSQGYVTDATCGPSRAGLITGRYQQRFGYEEINVPGYMSKNSALLGDDMGLPLNQMTMADYLKKLGYTNALFGKWHLGDADRYHPLKRGFDVFYGFRGGDRSYFEYPDPSKIHHDKRMERGFGNYEEPKSYVTDLLADEAVNFIENNKNTPFFVMLSFNAVHTPMEARKEDLEKFPNLDGKRKELAAMTLAMDRACGKVLDKLKELGLDKNTIVVFSNDNGGPTDKNASDNRPLSGTKSNHLEGGLRVPFILSWPDKIDKGIVYNYPVSTLDLLPTFYSAGGGNLGDLTKIDGVDLLPFLIHKNTTGRPHQELFWKKDVRAVLREGDMKLIRF…
74	Arylsulfatase	Arylsulfatases	3.1.6.1	Phenol sulfate	Bacteroides plebeius, strain DSM 17135	Sulfatase	61.87	MKTNLKNNIMKGMAVMPFLSVCVGVAAQQKQMNVIYIMSDDHTSQAIGAYGSRLAVLNPTPTIDELARDGMLFENCFCTNSISTPSRACIMTGQYSHRNKVLTLDEVLQPDQEYLVDEFHNMGYQTAMIGKWHLGCEPSHFDYYSVFNGHGGQGEYFDPTFLTSDVTDKKWPNNQIKKMGYSSDIVTNLAIDWLKNRRDKSKPFFMMHHYKAPHDMFEYAPRYEYYLDDVEVPVPLSLFDTDKWGSEGTRGKNDSLRHFIGTSVSSRHEIRNYVMEYKCNTGDEMENTYLAYQHYLKSYLRCVKGVDDNLKRLFDYLKKEGLWENTIIVYTGDQGMMLGEHDLQDKRWMYEESQRMPFIVRDPRCPYKGAKSDLMINNIDFAPTLIEMVGGKEPSYMDG…
75	Sulfatase	Sulfatases	3.1.6.-	It can remove sulfate from the C-6 position of glucosamine	Bacteroides uniformis NP1	Sulfatase	56.22	MRTDLFFYPAIAAAVLSSCGGKKDAAEVNKKPNVLFIYADDIGYGDLSCYGGKSIITPNVEKLASEGIMFTNAHCGASTSTPSRYGMLTGEYPWRKKGTGIAAGDAAMIIKPNIYTMADMFVDAGYSTGVIGKWHLGLGDKAGQQDWNGLVSPNPSDIGFEFSHIMAATADRVPCIWIENGRALGLSPDDPVEVSYTKNFPGEPTGKDNPELLRLHPSHGHDMSIVNGISRIGYMRGGKSALWRDQDIQDSIIANAVRFIEEKSASDKPWFLYLATNDIHVPRDPHERFVGKSGHGLRGDALLSFDWGVGEVMKTLERLGIDENTIVVLSSDNGPVIDDGYKDQAVELLGDHKPAGDLRGGKYSNYEAGTRVPCILRWKNHVKPGVNDLLMSQLDWFAS…
76	Sulfatase	Sulfatases	3.1.6.-	It can remove sulfate from the C-6 position of glucosamine	Bacteroides uniformis NP1	Sulfatase	49.25	MILHQMYTTDAVSGPSRAGLMTGRYQQRFGIEENNVVGYMSKHGKYGLDMGVPTSEKFISNYLSEAGYVCGAFGKWHLGATDEYHPYRRGFDQFVGFRSGGRNYYPYQNEEESFADEGVENRLEYGFAHFKEPDKYMTYLLADEACKFIEENAKKPFFVYLAFNAVHAPLQAEKEDLAKFAHLKGKRKSLAAMAWAMDKACGQVFDKLKELGLDKNTIIVFTNDNGGPNGTETSNYPLSGMKATFLEGGVRVPAIISYPGVIKKGSHYNKPTSFLDFLPAFINLAGYDKEIANPLDGVDIIPYLTGKNNGRPHQTLYWKIENRGVVRDGDWKFMRFPDRPAELYDISKDEGEQNNLADKHPDLIRKYYKMLSDWEMTLDRPMWMLERKYEKRVLEQFYE…
77	Sulfatase	Sulfatases	3.1.6.-	It can remove sulfate from the C-6 position of glucosamine	Bacteroides uniformis NP1	Sulfatase	62	MVKFNFNSSLATVIAVVPTVCSMAQEKPMNVIFIMSDDHTSQAIGAYGSHLAKLNPTPNIDELASDGVVFDNCFCTNSISTPSRACIMTGQYSHHNEVLTLDEKLDVDRQYLVKEFSKMGYQTAMVGKWHLKNEPANFDYYKVLNGHGGQGEYFNPTFLTNEISNKEWPKNQVKTNGYSSDVITNITIDWLKNRRDKNKPFFLMHHYKAPHDMFEYAPRYKYYLEDTEVPVPESLYNQDGWGSEATRGKNDSLRHFIGTSISRRHENRSYAEDYKINTGDPKKDTYEAYQRYLKDYLRCVKGVDDNLKRLFDYLKKEGLWENTIIVYTGDQGMMLGEHDLQDKRWMYDESMRMPFIVRDPKSKQRGVHNDLMINNIDFAPTLIELAGGKAPKYMDGKSF…
78	Putative arylsulfatase 2	Arylsulfatases	3.1.6.1	Phenol sulfate	Cellulophaga baltica	Sulfatase	41.95	MRILFILLSIGLHHISAAQEQPNIIFLFADDAGYADFGFQGSTEMKTPNLDKLAQQGVTFTQGYVTDATCGPSRAGLITGKYQQRFGYEEINVPGYMSENSKFLADDMGLPLDQVTIADYLKTLGYKTAMYGKWHLGDADRFHPTKRGFDEFYGFRGGARSYFGYEEASSAHHDTKMERGFGNFEEPQRYVTDALADEAIAFIRKNKKNPFFIYLAFNAVHTPMEATEEDMNAFPDLTGKRKELAAMTLALDRACGKVLNKLKELGLDKNTIVVFSNDNGGPTDKNASLNLPLSGTKSNHLEGGIRVPFVMRWPKTIKKGSQYNYPISTLDLLPTFYVAAGGNSHDLTDVDGVDLIPYLQGTNKSRPHQTLFWKKEVRLAYREGDWKLIRFADRPAELY…
79	Putative arylsulfatase 2	Arylsulfatases	3.1.6.1	Phenol sulfate	Echinicola pacifica	Sulfatase	52.54	MLCGSLLLFILLHSNPLAAQTKKPNIVLLFSDDAGYYDFGFQGNPHFPTPHLDQLAREGVELEQFYVTAAVCGPSRAGMLTGMYQQRFGFEENNVPGYMSSAGLQGDQMGLPLGLQTMGDYLKPLGYKSMVIGKWHMGSADEYHPLNRGFDEFFGFRGGARSYFELSESQQEARPEDRLERGFGHYEESKGYLTDVFADEACRFIEENSDQPFFLYLSFNAVHTPLEATAEDMAKITGLTGKRKQMAAMTLAMDRACGQVLDRLKQLGLEENTLVIFTNDNGGPTDASAANNYPLSGTKANHLEGGIRVPFIIKYPRELGAGGQYPYPVSTLDLLPTFYAAAGGEVEDLEGLDGLDILHYLKGEQSARPHEKLYWKKENRGAIRKGDWKLLRFPDRPAE…
80	Putative arylsulfatase 2	Arylsulfatases	3.1.6.1	Phenol sulfate	Formosa agariphila KMM 3901	Sulfatase	55.07	MKNIQNSKSMKSPILIAFIFGVFSYMYGQNQPNIVFILSDDAGYADFGFQGSKEFKTPHLDALAKSGVKFTQAYVSAAVCGPSRAGILTGKYQQRFGYEENNVPGYMSASGIIGDEMGLPLDQKLISEYLQEQGYKTALFGKWHMGNADRFHPTKRGFDTFYGFRGGARSYYEFDENNKSSRKEDRMERGFGNFEESELYLTDALANETIQFIEENKAQPFFVYLSFNAVHTPMEAHPDDLKKFPNLEGKRKTLAAMTLALDRACGKVIDKLDELGLRENTIIVFTNDNGGPSDTNASLNKPLGGTKANHLEGGIRVPFLMALPKNKQKNTTYQYPISTLDLFATFYNIAGGNEKQITGLDGVNLLPYVTGENKLRPHETLYWKKEVRGAIRHLDWKLI…
81	Putative arylsulfatase 2	Arylsulfatases	3.1.6.1	Phenol sulfate	Labilibacter marinus	Sulfatase	52.35	MKYSTLILALTLILNVACAQDKPNIVLLFSDDAGYADFGFQGSKDMITPNLDKLAKSGIRFTEGYVSESTCGPSRAGMLTGKYQHRFGFEENNVPGYMSPNSALDKDDMGIPLDEKTIADYLKPLGYTSAIFGKWHMGGADRFHPMKRGFDEFYGFRGGARSYYAYLKEPAEHLNKLEKNFGNFQEHEGYLTDKLAEEAVDFIERNQDKPFFAFVSFNAVHTPMDAEEEDMKKFPQFEGKRKEVAAMTLAMDRACGKIMDKLKELGLDKNTIVVFANDNGGPTDKNASVNYPLAGTKSNHLEGGIRVPYLMSWPGQLKKNTTYNYPVSTLDFLPTFVSLAGGDVNDIEETDGVDLMPYIQGKNSERPHQTLYWKKDCRAAVRDGDWKLLRFPDRPAELY…
82	Acetylglucosamine-6-sulfatase 3	Acetylglucosamine-sulfatases	3.6.1.14	Hydrolysis of the 6-sulfate groups of the N-acetyl-D-glucosamine 6-sulfate units of heparan sulfate and keratan sulfate	Labilibacter marinus	Sulfatase	61.3	MKSVLIILALLSCHHLMAKKKQPNIIFIMSDDHTSQAIGSYGGRLSGLNPTPNLDKLAADGIRFENAFCNNSICTPSRASIITGQYPQTNGVLDLDIHLDTAKQYLPVELKKLGYSTAIVGKWHLHEEPVSFDYYKVLPGQGKYFNPSFLEKGKGQWPKNKVKSEGHSTDVITDISIDYIKNVDKKKPFFLMHHYKAPHDFFEYAPRYEDYLAKTEIPEPSSLYYQPNWGSEGTRGKNDSLINYIGTSISDRHMYRNYNTFFFEDTLSPGPISAHIAYQEYLKRYLRCVKGIDDNLGRLFAFLKEEGLWENTVIIYTGDQGMMLGEHDLQDKRWMYDESMRMPFIMHYPKGIDPGMVSDLLINNTDYAPTMIELAGGKKPEYMQGESFINTLQGKEEVD…
83	Arylsulfatase A	Arylsulfatases	3.1.6.8	Hydrolyzes galactose-3-sulfate residues in a number of lipids and hydrolyzes ascorbate 2-sulfate and many phenol sulfates.	Lewinella agarilytica	Sulfatase	52.69	MKFILKAAALWPLAILLSLSLSAQEKPNIVFLFADDAGYADFGFQGSKTMITPNLDRMAKQGVRFQQAYVSHPTCGPSRAGILTGRHQNRFGFEENNVPGFMSAVSAADNEEMGLPLEEKTMGEYMKSIGYRTGYFGKWHQGGADRFHPLQRGFDEFFGFRGGARSYFPYEKTPAEVQNKLERNFGNFAEHEGYLTDVLGAEAADFIDRHQKEPFLVFLAFNAVHTPMDATPEDLAKFPQLKGARQQVAAMTLALDRACGVVLDKLEELGLAENTIVVFSNDNGGPTDRNASSNYPLSGTKSTYLEGGIRVPFVMRWPARLPAGTTYPQPVSTLDLLPTFYAAGGGSVEDIKDADGVDLTPFLTGEQFGRPHKTLYWKRESRAVVRDGDWKLIRYGDRP…
84	Sulfatase	Sulfatases	3.1.6.-	It can remove sulfate from the C-6 position of glucosamine	Pseudoalteromonas atlantica T6c	Sulfatase	58.85	MKLTFFIAGMATALLCHSSLAANEPEQETVQTKQPNVLVLMFDDMRFDTFSYRGGPVPTPNIDALANDGTRFDNAMTTTGLCSPSRAALFTGRWGHKTGLDDNVGLYHSHVDELSEEEGGVIRRAADTGYHVGYVGKWHLGPQGPALRGADFMWGKEHSQARHSRPYVPYEKQAKMAQYNRGERDENGEKHEYYQTLPGTYETSHTAENVDMGQKMLREAAKMDEPFFGVISFEQPHPPYRVPEPYASMFDPKTVKLPANHAVKRQFKPMAQDEDWWPWHDVGHMTDMDWRKSRTFYYGAIAMIDHAVGDIIKTAKDVGMYDDLTIIVLGDQGSMLGEHNLYDKGPYAYDELMRMPLIIRAPNVEPRIVNKQVSMLDIAPTISEMMSLEPDGDVDGRSL…
85	Sulfatase	Sulfatases	3.1.6.-	It can remove sulfate from the C-6 position of glucosamine	Pseudoalteromonas atlantica T6c	Sulfatase	55.21	MTFNKKVSTLLWGTLIAISVGNASAADAGQSKADESNEKPNILFVLADDLGYNDVGFNGSTDIKTPNLDGLAKNGMTFDAAYVAHPFCGPSRAAIMTGRYPHKIGAQFNLPEDNSNVGVSADELFIAQTMKSAGYFTGAMGKWHLGEASEYHPNKHGFDEFYGFLGGGHNYFPEQFEAAYNKRVAQGMTNINMYLTPLEHNGKEVRETEYITDGLSREAVNFVDKAAAKKKPFFLYLAYNAPHVPLQAKEEDMAMFSQIKDKKRRTYAGMVYAVDRGVGRIVEQLKKNGQFDNTVIVFTSDNGGKLGQGANNYPLKEGKGSVQEGGFRTPMLVHWPKHMKAGSRFSHPVLALDLYPTFAGLGGAVLPEDKKLDGKDIWADIQANTAPHKDEFIYVLRHR…
86	Sulfatase	Sulfatases	3.1.6.-	It can remove sulfate from the C-6 position of glucosamine	Pseudoalteromonas atlantica T6c	Sulfatase	63.47	MRKYLIMLLILAGCSPVLADVPKNTAVAASKAAPTKKPNVLFISIDDLRPELGSYGSDIAITPNLDALAKRGVQFNQAHAQQAICGPSRASILTGIRPDSLDVHHNYQLFRHKLEDVVTLPQHFANNGYEAFYVGKIFHHTDKDEALSWNVEPAYHKLPPGLAKPKRYALKANQKIQQDNRKAMFAKYGEQAKFGLGSGPAYESADVPDTAYHDGYNTELAIATMKEQLNNRDKPLFIGFGMMKPHLPWIAPQKYWDLYNPDDITLAENDTAPIDGAAMGLHASFELRTFSNIPKKGPIAPTLARTLKHAYLANISYVDAQIGKMLAALEEQGILDNTIVIVWSDHGWHLGEMGIWGKATNYDIATRVPLIIATPDMKKDIQGQKTDALVELVDIYPTL…
87	Sulfatase	Sulfatases	3.1.6.-	It can remove sulfate from the C-6 position of glucosamine	Pseudoalteromonas atlantica T6c	Sulfatase	52.79	MKSVFHRVVAALSISVACTSLSYAKQPNIVFLFSDDAGYADFGFQGSETMKTPNLDQLASEGVRFTQGYVSDSTCGPSRAGIMTGRYQQKFGYEEINVPGYMSEHSAIKGAEMGIPLDEVTMGDYMKSLGYRTAFYGKWHLGGTDELHPMHRGFDEFYGFRGGDRSYWAYEVNAPERKSAVFTDKKLEHGIDQFQEHEGYLTDVLAEKANQFIEKAPDKPFFIFLSFNAVHTPMEATPEDLAKFPQLKGKRKEVAAMTLALDRASGAVLNKLKELGLEDDTLVVFSNDNGGPTDKNASSNYPLAGTKSNFLEGGIRVPFLVKWPAKLAAGKVYDKPVSTLDLLPTFFKAGGGEEVMSELDGVDLMPYITGQNNKAPHESMYWKKETRAAIRQGDWKLLR…
88	Putative arylsulfatase	Arylsulfatases	3.1.6.1	Phenol sulfate	Bacteroides ovatus ATCC 8483	Sulfatase	57.03	MKQPFILTLVSSVACAATAANKAPENTTPTKSKTPNVVFIYADDLGYGDLECYGAKNVQTPNVNRLAKSGILFTNAHATAATSTPSRYSMLTGEYAWRKEGTDVAAGNAGMIIRPEQYTMADMFKSVGYTTAAVGKWHLGLGDQTATQDWNAPLPCALGDLGFDYHYIMAATADRVPCVYIENGKVANYDPSAPIEVSYQKNFEGEPTGKSNPELLYNLKPSHGHDMSIVNGISRIGFMKGGGKALWKDENIADSLTTHAIQFIEENQNKPFFLYFATNDVHVPRFPHDRFRGKNPMGLRGDAIVQFDYCVGEILNTLEKLGLRENTLIILSSDNGPVVDDGYDDKAEELLNGHSPAGPLRGNKYSAFEGGTRIPAIVSWPAGVKKGMTSDLLVSQVDW…
89	Putative secreted sulfatase	Sulfatases	3.1.6.-	It can remove sulfate from the C-6 position of glucosamine	Bacteroides thetaiotaomicron VPI-5482	Sulfatase	58.45	MRKEFYGILPLALTSCLASQTTAQEKQTQRPNVVFIYADDIGYGDLSCNGAKTIHTPNVERLAKMGVRFTNAHSAAATSTPSRYAMLTGEYAWRKAGTGIAAGDAAAIIRPERYTMANLFKDAGYNTGVVGKWHLGLGDKGGEQDWNKPLQPGTNDIGFEYSFIMAATGDRVPCVFVENDQVINLDPNDPIQVSYKANFPGEPTGKDNPELLKMHPSHGHDQSIVNGISRIGYMKGGKSALWQDEKIAETLTGKAVSFIEGHKSAPFFLYFATQDAHVPRVPSPQFAGKSGMGPRGDCLLEFDWSVGEILNALERLGLDKNTLVILSSDNGPVVDDGYKDQAVELLGDHTPGGIYRGGKYSSFEAGTRIPCIWSWQGVIRPGTVSDALLCQIDWFATFA…
90	Sulfatase	Sulfatases	3.1.6.-	It can remove sulfate from the C-6 position of glucosamine	Thermotoga maritima MSB8	Sulfatase	69.75	MSDYLLVVFLAAKIVLFYVPTLSSFSVSVVFSTAGWLMLLILVFKGGHKLLYTVLSLLLFVDFLYFQNFGNLPSIKEVVLLPQVGDLGGEIKYFIDLYSLLFVADLPFVWFFFKENTKRAYSLSSLFVLVLSFTFLGAIHTSQNLQSKFVFNRYGVFDYHVQDIINLFVNKKEENNDLTVSSVRNETTKPSQKSFFGIGKGKNVIVVQMESLQNFVIGLEVNGQEVTPNINSFLRDSGTVYFSSCYQQVGSGNTADAEFIVNTSLHTLGDSVVYEEYPVINLPALPRIMKQNGYHTIAFHGNVGWFWNREEVYKHIGFDEFVSLEDFQQDEVFGMGLADVSFFKQAVQKLRNYPQPFYAFLITISSHTPFVIPEEHRKLELPEDIADTIVGHYLQAIHY…
91	Sulfatase	Sulfatases	3.1.6.-	It can remove sulfate from the C-6 position of glucosamine	Zobellia galactanivorans DsiJT	Sulfatase	54.45	MKWSRRVFLFFASFTMLFSGWAQDKPNIVFILSDDAGYADFGFHGSKEFKTPELDKFAKNAVRFSQAYVSAAVCGPSRAGLLTGKYQQKFGFEENNVPGLMSKNGLTGDDMGLPLDQKTIADYLKEQGYRTALFGKWHQGNADRFHPTKRGFDEFYGFRGGARSYMPFGADNELTRNEDRLERGFGGFQEHEGYLTEELADEAIAFIERNQKNPFFVYLAFNAVHTPMEAKEEDLKKVKGLSGKRKTLAAMTIAMDRACGKVLDRIKALGLDKNTLIVFTNDNGGPSDANESSNLPLSGTKANHLEGGIRVPFLMSWPGKLKPNTVYENPISTLDLLPTFVTAAGGDVNAIDGLDGVDLLPYLQGKKQGRPHETLYWKKEARGAIRHNDWKLVRFPDRP…
92	Endoxylanase	1,3-1,4-β-Glucanases	3.2.1.8	Xylans	Bacteroides eggerthii DSM 20697	GH5	47.97	MKNMKNTVSILLFLFVFLSACSDDSIPEKLKPEPPQPDVEEPNPDDDSENCGNNQNSVLPALSVVGRYLKNEKGEIINLHGFTQTYSPFFNNNAWNNYDVQGCLNYNKSMVDGILAAGWKFNFVRMHLDPYWSDDPAMQSVRYEGHERFSEFRFRKYLDELFVPMAEYFMSKGMYVVMRPPGVCPNEAPYQGIELGDSYQQFLLKVWNIVSQHPKLKNNTGVMFELANEPVKIKGTDGTYGSTGDGHFQNLQLYFQAIVDKIRANSRNIIWVPGLSYQSSYAGYAKYRIQGENIGFAVHCYPGWYGSDAEEDSSEGIGSSTGGGYESFQRGWDAQVGPVAAFAPIMVTEIDWAPKKYNATWGKSITGVAGEKGFGANFKYIADNSGNVSWLFFTTRSHE…
93	Mucin-desulfating sulfatase	Sulfatases	3.1.6	Sulfuric ester hydrolase activity	Zobellia galactanivorans DsiJT	Sulfatase	61.72	MVKFIRNSVLTLKGIGVICSLFMVQLSIAQDKKKPNIIFIMTDDHAAGATGIYGGRLADLGATPNLDALAKEGMVFENCFVTNSICTPSRASIITGQYSQTNGVLDLWNELDANKQYLPQEIKKLGYETAMIGKWHLHQEPKAFDYYKVFPLQGTYFDPEFRAKDKGKWPDNTVQYKGHSSDVVTDQALNWVHNRKNPEKPFFLMYHFKAPHDMFEFNPKYASYLEDIKIPEPQSLYDQPHWGSEATRGKNDSLLHVIGSSISSRHPNRNYVDIYKTGNLPTEKERTSAAYQEYLKRYLRCVKGVDDNLGRFFEDLKKEGLWENTIIVYTSDQGMMLGEHDFEDKRWMYEESIHMPFIVRYPEKIKAGSRTSYLINNTDFAPTLIELAGGRAPVYMQGK…
94	Mucin-desulfating sulfatase	Sulfatases	3.1.6	Sulfuric ester hydrolase activity	Zobellia galactanivorans DsiJT	Sulfatase	64.75	MRCKKNNVLYALLLLIAFSSCKEEKAVITEKKPNIIYIMADDHTTQGFGIYGSRLASLNPTPTLDKIAKEGMIFDNCFVSNSICTPSRAAIMTGQNSQMNGVLDLDGRLEPARQFLPIEMKKLGYQTAIVGKWHLKEEPAAFDYYQVLPGQGKYFDPEFRVRGDKPWPNNTVKTKGHSSDMVTDITLDWLKTKRDPNKPFFLVHQFKAPHDDFENAPRYESYLADTFIPEPESLYERGNNGSIATRGKNDSLTRIIGSSVSHRNLIRNQAMNIYVDSSIHRAYRDADKIRPEEYVKWEMDDEERKYTSKVYQDYVKKYLRCVKGVDDNVKRLMDYLEAEGLMDNTIIVYTGDQGFMLGEHDFIDKRWMYEESMRMPFFVRYPEKIKAGSRTDAIINNTD…
95	α-1,3-L-(3,6-anhydro)-galactosidase	Oligosaccharide hydrolases	3.2.1.-	Neoagarooligosaccharides	Zobellia galactanivorans DsiJT	GH117	46.21	MNKYSQFLIFAAVLVSACNSPKTTKEMKSTDDCPEKVTFTPEQIDHLGITDTNHLSAASKRALKWPTDLGNEWFIQFGPLQPLKGDLAYEEGVVRRDPSAIIKENGKYYVWYSKSTGPTQGFGGDIEKDKVFPWDRCDIWYATSEDGWTWKEEGPAVTRGEKGAYDDRSVFTVEIMKWEDKYYLCYQTVKSPYNVRVKNQVGLAWADSPDGPWTKSEEPILSPADNGVWKGEEQDRFAVIKKGDFDSHKVHDPCIIPYKGKFYLYYKGEQMGEAITFGGRQIRHGVAIADNPKGPYVKSPYNPISNSGHEICVWPYNGGIASLITTDGPEKNTIQWAPDGINFEIKSVIPGVNAHAIGLNRTADVEKEPTEILRWGLTHIYNNGDYQSIMRFSSERKTR…
96	Endo-1,3-β-glucanase	1,3-β-Glucanases	3.2.1.39	Lichenan and laminarin	Zobellia galactanivorans DsiJT	GH16	41.02	MKINRKTPFYRMIMINYLNLSLSILLVALSCSSTDSGQDLKPTDLKVDITLVGTDDAHPNGNGSGIVEVSASASNAVRYAFRFENGDVEDSTDGSTTHTFTEEGTHPYTIVVWAYSPTGEFINETFNVEVYKSNEAFNTLVFSDEFEYEGKPDPEKWHYQVIPPNNGSWHNNELQHYTNRSENSFVSDGTLKIRAIKEKYTFEGSTKDYTSARLNSKFAFTYGKVEVRAKLPSKKGTWPAIWTLGANSNETGNYFGEQYGNAEWPACGEIDILEQNGWDKESTIAHFHWSDLNSDEYQNLGGTTPITNASGSFHVYSLEWNASAMKVFLDDTLVYELKNSQNTPYNAPHYLLLNIAMGGTLGGDIPENFTDDIFEIDYVRIYQ
97	Alginate lyase	Alginate lyases	4.2.2.11	Alginates	Zobellia galactanivorans DsiJT	PL7	46.61	MKKNVFTTLRTVVNGDIMWKLIPVFFLALCLGSCSEEPVDPEEEAVLTKLSANSTAIGISSVSASTSQSPNVASNTLDGSTSTRWSGYGDGASITYDLGSSANIDYVKIAFYKGDSRKTKYEVWVGNSTSSLTKIKSKTSSGSTSDYETIDLPNSTARYIRIVGKGYVLNSGGSTVLWNSITKFQAWGSGGSSTLPISGNSPASVLGITANTWKINSFIGSPGSSATYYDDITDASGISYNTYSDDNYFYTDGEWVYFKCYRGLGGSANSQNPRVELREMDNGNLASWTGDSGTHTMEWTVQVNQLPQDTDGDGGVLCFGQIHGPSKNSDGVEVDDVVRVQFIGEENQSSGSVKLKISGYVTEEQGGSQTFSGYSLDTTYNCKLVYSGGYVELFMNGSS…
98	Alginate lyase	Alginate lyases	4.2.2.11	Alginates	Zobellia galactanivorans DsiJT	PL7	39.49	MKKTVLATVTVFVLFACKDKPKATTDSASESAVAMKNTTKYPSELIPQMDEWKILLGDGTHKEDLVNYAKDDFFYVEHENETDWVVFKTPNSGITSRTSSNTRTELGQKKHWIPETGGKLNATLKVQHVSTSGDARVAASYSVVVGQIHSDEGHENEPIKIFYKKFPGHTKGSVFWNYEINTKGDNSKRWDYSTAVWGYDMSVVGPTATSYPEEPEDGIALGEEFSYEINVYEGIMYLTFSSEGHKTIKFTKNLLKSNFTKKSDIPQQIKTLYASIGRDGIERENAYAGEIQYFKLGAYNQTNGKSPEDNLVWSTGADVYDGDIAKQYANGSYAEVWFKEATLGSGSAPEAQ
99	Endo-1,3-β-glucanase	1,3-β-Glucanases	3.2.1.39	Lichenan and laminarin	Zobellia galactanivorans DsiJT	GH16	52.75	MKKIITYLLMVLCFGMTPILSAQDYNLVWQDEFDDGIGPDWVFETGMGYNGWGNNELQYYRRENAAVENGNLVITAKHENFGGAQYTSARMKTQGRKSFKYGKIEARIALPSGQGLWPAFWMLGNNITSVSWPACGEIDIMERINNALQTHGTIHWSDQNGDHASYGDDVGVSDPGQYHIYSVEWDANSIKWFVDGQQFNEVDISNGVNGTGEFQNEFFILLNMAVGGDWPGFDVDQSKLPAQMLVDYVRVYQKGDDNDSANTLKIEAESYLYSNDVQKEPCSEGGENVGYINNGSWMSYPGINFPSSGNYLIEYRVASAVDGGRFSSDLEAGETVLGELSVPNTGGWQNWTTVSQTVNVSAGTYQFGLYSISGGWNINWIRITKQGTASAATALNSSL…
100	α-amylase	Amylases	3.2.1.1	Endohydrolysis of (1->4)-alpha-D-glucosidic linkages in polysaccharides containing three or more (1->4)-alpha-linked D-glucose units	Thermotoga maritima MSB8	GH13	64.16	MKKPFLLLAFVFLLFLTSCFQTSMSQSLVSSNPHSNSTNTDGTSSNLEEVKYPVVYEIFIRSFYDRDGNGVGDLNGVSQKVDYLKELGVDAVWFMPFNEAVSYHGYDITDYYNVEKDYGTMEDLENMIQVLHENGIKVIMDLVINHTSDEHPWFKDAVENTTSSPYWDYYIMSLEDHSGQDHWHWKINSKGQKVWYFGLFGYNMPDLNHDSQKVREEVKKIVDFWISKGVDGFRIDAAKHIYGWSWDDGIQESAEYFEWFRDYVLSKKPDAILVGEVFSGNTYDLSLYPIPVFNFALMYSIRNYPEGQDGMIENNWVEESFLFLENHDLHRFFSHLQEHYKKFSESDYEFIKKRAALWYFLIFTLKGSPVIYYGGEIGTRGFKWHGPVYDEPVREPMQW…
101	α-amylase	Amylases	3.2.1.1	Endohydrolysis of (1->4)-alpha-D-glucosidic linkages in polysaccharides containing three or more (1->4)-alpha-linked D-glucose units	Thermotoga maritima MSB8	GH13	52.15	MNFKRLIIYEAFARAYPGEKGKKFDSLIKDLERLKGMGINTVWLMPIHPTGIEGRKGTLGSPYAIRDYYEIDPLIGTKDDFKRFVKRAHELNMYVLMDMVLNHAAADNVLVREHPEWFLRDEKGNPTRKVPDWTDIVDFDYSNGELRKYMINMMKYWVEEFDVDGFRCDVAGLVPLDFWLQARKELDPVKRLIWLSETHDPYMYQAFDITYDYDGYYKFRDFIEGRGSLREYVDFLRMQDHMYPRGYIKMRFLENHDQPRIAKFIEEDSLVHWIAFLFTFKGVPLVHNGQEYGLKEDVDIFNEYTLPFPMEENRISILHRKLAHYRYGTSVFSEGEMLFVKNDQPEKVISYLWRYENRYILCMLNPLLENTKVTLDFSGIWESACIHSKNVFNDEIVRV…
102	α-amylase	Amylases	3.2.1.1	Endohydrolysis of (1->4)-alpha-D-glucosidic linkages in polysaccharides containing three or more (1->4)-alpha-linked D-glucose units	Thermotoga maritima MSB8	GH57	64.82	MRGKILIFLHAHLPYVHHPEYDHFLEERWLFEAITETYIPLLMMFDEIEDFRLTMSITPPLMEMLSSRDLQEKYERHMEKLIELANKEVERTKKEHPLKHKMAKFYREHFEKILNVFRSYDGNILEGFKKYQETGKLEIVTCNATHAFLPLYQMYPEVVNAQITVGVKNYEKHMKKHPRGIWLAECGYYQGLDLYLAQNNVEYFFVDSHAFWFADEQPRYGVYRPIMTPSGVFAFARDPESSEQVWSAAVGYPGDPRYREFYRDIGFDREMEYIKDYIDPSGVRINTGIKYHRITSKSLDASQKEYYDIDLAMEAVEEHARDFLHKKESQARRLMDIMGVEPVIVAPFDAELFGHWWFEGVFFLKRFFELVNESKDLKLVTASEVIDTLEEVQIATPAD…
103	α-glucuronidase	Glucuronidases	3.2.1.139	Glucuronic acid from the xylan backbone	Thermotoga maritima MSB8	GH67	80.59	MDYRMCWLEYRGLPADVAGKLKDWFSSVSILEPGSSVLKDEIRRFSERSIGITPRFYSRPLKKEKYIMVGRLESLPIKLDVNLGEEGFMLRTIEWNGSKILLVTGETKKALVYGIFDLMKRIRLGEDIEKMNVLAKPKAKFRMLNHWDNLDGTIERGYAGNSIFFKDNRIIINQRTKDYARLLASIGINGVVINNVNVKKREVYLIDSIYLKKLKKLADIFREYGIKIYLSINFASPVYLGGLDTADPLDERVARWWREKARGIYDYIPDFGGFLVKADSEFNPGPHMFGRTHAEGANMLARALAPFGGVVIWRAFVYNCLQDWRDYKTDRAKAAYDNFKPLDGQFDDNVIIQIKYGPMDFQVREPVNPLFGGMEKTNQILELQITQEYTGQQIHLCFL…
104	α-L-fucosidase	Fucosidases	3.2.1.51	Fucosyl-α-1,6-N-acetylglucosamine	Thermotoga maritima MSB8	GH29	54.17	MISMKPRYKPDWESLREHTVPKWFDKAKFGIFIHWGIYSVPGWATPTGELGKVPMDAWFFQNPYAEWYENSLRIKESPTWEYHVKTYGENFEYEKFADLFTAEKWDPQEWADLFKKAGAKYVIPTTKHHDGFCLWGTKYTDFNSVKRGPKRDLVGDLAKAVREAGLRFGVYYSGGLDWRFTTEPIRYPEDLSYIRPNTYEYADYAYKQVMELVDLYLPDVLWNDMGWPEKGKEDLKYLFAYYYNKHPEGSVNDRWGVPHWDFKTAEYHVNYPGDLPGYKWEFTRGIGLSFGYNRNEGPEHMLSVEQLVYTLVDVVSKGGNLLLNVGPKGDGTIPDLQKERLLGLGEWLRKYGDAIYGTSVWERCCAKTEDGTEIRFTRKCNRIFVIFLGIPTGEKIVIE…
105	β-glucuronidase	Glucuronidases	3.2.1.31	Hydrolase activity, hydrolyzing O-glycosyl compounds	Thermotoga maritima MSB8	GH2	65.43	MVRPQRNKKRFILILNGVWNLEVTSKDRPIAVPGSWNEQYQDLCYEEGPFTYKTTFYVPKELSQKHIRLYFAAVNTDCEVFLNGEKVGENHIEYLPFEVDVTGKVKSGENELRVVVENRLKVGGFPSKVPDSGTHTVGFFGSFPPANFDFFPYGGIIRPVLIEFTDHARILDIWVDTSESEPEKKLGKVKVKIEVSEEAVGQEMTIKLGEEEKKIRTSNRFVEGEFILENARFWSLEDPYLYPLKVELEKDEYTLDIGIRTISWDEKRLYLNGKPVFLKGFGKHEEFPVLGQGTFYPLMIKDFNLLKWINANSFRTSHYPYSEEWLDLADRLGILVIDEAPHVGITRYHYNPETQKIAEDNIRRMIDRHKNHPSVIMWSVANEPESNHPDAEGFFKALY…
106	Exo-polygalacturonase	Oligogalacturonate hydrolases	3.2.1.67	Polygalacturonase activity	Thermotoga maritima MSB8	GH28	52.45	MIMEELAKKIEEEILNHVREPQIPDREVNLLDFGARGDGRTDCSESFKRAIEELSKQGGGRLIVPEGVFLTGPIHLKSNIELHVKGTIKFIPDPERYLPVVLTRFEGIELYNYSPLVYALDCENVAITGSGVLDGSADNEHWWPWKGKKDFGWKEGLPNQQEDVKKLKEMAERGTPVEERVFGKGHYLRPSFVQFYRCRNVLVEGVKIINSPMWCVHPVLSENVIIRNIEISSTGPNNDGIDPESCKYMLIEKCRFDTGDDSVVIKSGRDADGRRIGVPSEYILVRDNLVISQASHGGLVIGSEMSGGVRNVVARNNVYMNVERALRLKTNSRRGGYMENIFFIDNVAVNVSEEVIRINLRYDNEEGEYLPVVRSVFVKNLKATGGKYAVRIEGLENDY…
107	Laminarinase	1,3-β-Glucanases	3.2.1.39	1,3-β-glucans such as laminarin	Thermotoga maritima MSB8	GH16	70.88	MMSRLVFALLLFPVFILAQNILGNASFDEPILIAGVDIDPPAEDGSIDTGGNWVFFTNSNGEGTARVENGVLVVEITNGGDHTWSVQIIQAPIRVEKLHKYRVSFRAKASSQKNIGVKIGGTAGRGWTAYNPGTDESGGMVFELGTDWQKYEFEFVMRQETDENARFEFQLGRYTGTVWIDDVVMEDIGVLEVSGEENEIYTEEDEDKVEDWQLVWSQEFDDGVIDPNIWNFEIGNGHAKGIPGWGNGELEYYTDENAFVENGCLVIEARKEQVSDEYGTYDYTSARMTTEGKFEIKYGKIEIRAKLPKGKGIWPALWMLGNNIGEVGWPTCGEIDIMEMLGHDTRTVYGTAHGPGYSGGASIGVAYHLPEGVPDFSEDFHIFSIEWDEDEVEWYVDGQ…
108	Pectate lyase	Pectate lyases	4.2.2.22	Polygalacturonic acid (PGA)	Thermotoga maritima MSB8	PL1	39.86	MLMRFSRVVSLVLLLVFTAVLTGAVKASLNDKPVGFASVPTADLPEGTVGGLGGEIVFVRTAEELEKYTTAEGKYVIVVDGTIVFEPKREIKVLSDKTIVGINDAKIVGGGLVIKDAQNVIIRNIHFEGFYMEDDPRGKKYDFDYINVENSHHIWIDHCTFVNGNDGAVDIKKYSNYITVSWCKFVDHDKVSLVGSSDKEDPEQAGQAYKVTYHHNYFKNCIQRMPRIRFGMAHVFNNFYSMGLRTGVSGNVFPIYGVASAMGAKVHVEGNYFMGYGAVMAEAGIAFLPTRIMGPVEGYLTLGEGDAKNEFYYCKEPEVRPVEEGKPALDPREYYDYTLDPVQDVPKIVVDGAGAGKLVFEELNTAQ
109	Alginate lyase	Alginate lyases	4.2.2.11	Alginates	Saccharophagus degradans 2-40 DSM 17024	PL7	65.43	MTFIKIMGAGALIASASLANAATFVLEKVNTGFSVDGGNGAVEARQVYLWETNTNNVNQNWVQISHGGGYYSYKKQNTNLCLDGGSGGARLQPVTLEVCDSSNYDQHWNKVKVYTGTEIYRMEKRNAPGFSIDGNGGAAARQAIYLWNSNSNNVNQQWEFIRTDEDTGDGKLAIATAFDDGSSHSSYPASKAIDGNTAWASRWAASGSPVNLTIQLEQTSRVTEVGIAWGQGGSRAYTFEIYARPGTSGSWTKVFDDVSSGSTAGIEVFDITDIDAQQIRVKTFENTAGTTWTNITEVEIYGADGGSSSSSSSSSSTSSTSSTSSTSSSSGGFNLNPNAPPSSNFNLSQWYLSVPTDTDGSGTADSIKEGELNSGYENNSYFYTGSDGGMVFKCPISGY…
110	Chitin-binding protein	-	-	The cellulose-binding function has been demonstrated in many cases. Several of these modules have been shown to also bind chitin or xylan.	Saccharophagus degradans 2-40 DSM 17024	AA10-CBM2	45.87	MFAKKITYSTIALAIAGLSGNALSHGLMVDPPSRNALCGMIEKPDQATSPACQQAFQNDFNGGYQFMSVLTHDIGRQGGTSNNVCGFDSETWNGGATPWDAAIDWPTTQISSGPLEIDWNISWGPHWDDTEEFVYYITKPDFVYQVGVPLSWSDFEATPFCQLDYSDANPNANPGVSTTKSANLFHTQCNVPARSGRHVIYGEWGRNYFTYERFHGCMDVTFGGSNPPPSNQAPTANAQSVNVSSGSSVSITLSGSDVDGVISSYAIAAAPSNGSLSGSGAQRLYTPNGNFSGSDSFQFTVTDDDGATSNAATVSINVSSQPEPEPEPEPEPEPEPGTGASCEHVVVNAWDSGFQGAIRITNTSDQNINGWNVSWSYNNGTTISQLWNANFSGSNPYSA…
111	Oligoalginate lyase	Alginate lyases	4.2.2.	Low-viscosity alginate	Saccharophagus degradans 2-40 DSM 17024	PL17	81.37	MLSVNTIKNTLLAAVLVSVPATAQVSGNGHPNLIVTEQDVANIAASWESYDAYAEQLNADKTNLDAFMAEGVVVPMPKDAGGGYTHEQHKRNYKAIRNAGFLYQVTGDEKYLTFAKDLLLAYAKMYPSLGEHPNRKEQSPGRLFWQSLNEAVWLVYSIQGYDAIIDGLAAEEKQEIESGVFLPMAKFLSVESPETFNKIHNHGTWAVAAVGMTGYVLGNDELVEISLMGLDKTGKAGFMKQLDKLFSPDGYYTEGPYYQRYALMPFIWFAKAIETNEPERKIFEYRNNILLKAVYTTIDLSYAGYFFPINDALKDKGIDTVELVHALAIVYSITGDNTLLDIAQEQGRISLTGDGLKVAKAVGEGLTQPYNYRSILLGDGADGDQGALSIHRLGEGHNH…
112	Galacto-N-biose / Lacto-N-biose phosphorylase	Glycoside Hydrolase	2.4.1.211	1,3-β-galactosyl-N-acetylhexosamine phosphorylase activity	Bifidobacterium longum subsp. longum JCM 1217	GH112	86.29	MTSTGRFTLPSEENFAEKTKELAELWGADAIRNSDGTHLDEAVLALGKKIYNAYFPTRAHNEWITLHMDETPQVYLLTDRILAESDTVDIPLMESFFAEQLKPNRDADPHKYWEVVDRTTGEVVDSANWTLDADEDTVHVSGVAAWHEYTVSFLAYIIWDPVEMYNHLTNDWGDKEHEIPFDIYHPATRKFVFDTFEQWLKDSPQTDVVRFTTFFYQFTLLFDEKRREKVVDWFGCACTVSPRALDDFEAKYGYRLRPEDFVDGGAYNSAWRVPRKAQRDWIDFLSGFVRENVKQLADMSHAAGKEAMMFLGDQWIGTEPYKDGFDELGLDAVVGSIGDGTTTRMIADIPGVKYTEGRFLPYFFPDTFYEGNDPSIEGLDNWRKARRAILRSPISRMGY…
113	Cellodextrin glucohydrolase	Glucosidases	3.2.1.21	Hydrolysis of terminal, non-reducing β-D-glucosyl residues with release of β-D-glucose	Clostridium cellulolyticum H10 [B]	GH1	53.4	MAFKEGFVWGTATASYQIEGAVNEGGRGESVWDEFCRMKGKIDDDDNGDSACDSYHRYSEDIQLMKEIGIKAYRFSISWTRILPDGIGEINMEGVNYYNNLINGLLENGIEPYVTLFHWDYPMELQYKGGWLNPESPLWFENYAAICSRLFSDRVKYWITSNESQCYIGFGYGTGWHAPGFKLPVNQVVRAWHHNLKGLGLAAKAIRENAKGEVKVGLVACGEVGIPASDSEADMQAARNVLFDREHSEDSIDFGYGDLFEPALKGEYPKSLIPYLPKGWQEDMKDICVPLDFLGVNAYIGSIVEACENKKYRHLKLPVGIGKTSMEWPFKPETLYWVTRFISERYKLPVYITENGMANNDWISTDGKINDTQREDYLNQYLSALSKSIDDGADVRGYF…
114	β-1,3-glucanase / Laminarinase	1,3-β-Glucanases	3.2.1.39	Laminarin	Thermobifida fusca YX	GH81	80.83	MSHASRRRWRRATTSAATAALLCGALLTFPSAPAAAQVRLGSGSYTTVLPPGASGPSDHTGAPVAPKVTADFTQPVVTNDWWSSLIFQRYPGNPYGENLYAHPLSFKAQAHGLEVGYPDTPELVADGLKYQYTHSPDFVLGIHGLNAPAAKVAGYSDWTVTADLSDGTRQLRTTIGQGLPFVYADVSGGPIRVEFTAPPTVWRRSGNAVGVTVNGHHYALFAPSGTTWSESDTVFTADVGGSGYASVALLPSPDDFDRYAPYAYSFVTSTTLTYDYDPASATLTSTYRVTTEAREGTAQGTLLALYPHQWKETTTALTDLSYASPRGPMRVVEGDRFTTELTTHGILPSLPTVDSADHQRLRALIDAELHASDPWKGASDTYWTGKALGRLAQLVPIAD…
115	β-galactosidase	β-Galactosidases	3.2.1.23	β-galactosides	Bacteroides uniformis NP1	GH2	96.39	MFNFKTMRKHLVTVSLLLTSLFTNAYALNNNSDFNNGWKFTLSDSVCYSFVNYNPSSWKTVNLPHDWSVDLPFESTAEGCTGFLKGGIGWYSKTFDTPDNFVDKKCYIVFDGVYNNSEYWINGRKLGFHPYGYSPFFYDISDYLNPKGQENRISVRIDHSRYADSRWYTGSGIYRETQLIFTDKLHIPVWGTFVTTPVVSSERATVNIEVRVKNDYSGPRAGEVRTSYFDSKNKKVGEKLTSFLIEAGKEMKINQSVEISNPSLWDVDSPSMYLAKSEILVDGNVVDTKETPFGIRSIKFDAKKGFFLNGKNMKIKGVCLHHDASMIGAALVEDVWRRRLQTLKDGGCNAIRLSHNPGADAFLELCDEMGFLVQEEFFDEWDYPKDKRLNMDEQSIDYI…
116	α-glucuronidase	Glucuronidases	3.2.1.139	Glucuronic acid from the xylan backbone	Bacteroides ovatus	GH115	96.92	MINNKLLNIETMKKLFLFFYLSVVSIAAFAAEQFVIFTPAGNHFPLVANGVPCPIYIDSSEDKGVMIAAGNLQQDILQVCGKKPELLTSTSSKRCIIAGTYGTPFIKKLMSAGKIDKKELDGKNEKYILQVIANPCEGIDEAVVIIGSDRRGTIYGIYELSEQMGVSPWYWWADVPVMKQANVYIKPGQYSDGEPAVTYRGIFLNDEAPCLTRWVKHTYGTNYGDHRFYARVCELILRLKGNFLWPAMWSWAFYADDPQNSKTASEMGVIIGTSHHEPMARNHQEWSRKRKEYGAWDYTTNQKVIDQFFREGIERMQGTEDIVTIGMRGDGDAAMSKSTNVKLLENVVKNQRKIIEEVTKRPAKETPQVWALYKEVLDYYDKGMRVPDDVIMLLCDDNW…
117	Pectinesterase (Cthe_2949)	Pectinesterases	3.1.1.11	This protein is involved in step 1 of the subpathway that synthesizes 2-dehydro-3-deoxy-D-gluconate from pectin	Clostridium thermocellum ATCC 27405	CE8	35.38	MIKNKKILLLLCINLCLFFLLINRIQLVSSAAVNADIIVAKDGTGNFTTIQAAIDSVPSNSSKRTVIFVKNGTYKEVVTIRKNNIHLIGESNTKTIITYDNYAGKLKPDGTTYGTSGSASFYLYGTDTILENITIENSFDESIDVKDKQAVAAYIRGDRQIIKNCIFIGNQDTLYAHSGRQYYVNCKIIGDTDFIFGGATAVFENCEIVSTPKGGYVTAASTDLENYGFLFLNCRLTSDAPKNSTYLGRPWRPNAYVVYKTCYLGAHIKESGWTSMSGNLPENARFFEYKNTGPGAVVNSSRRQLSYAEAAKFTPQNLLKGTDNWNPVALVSQTSTLTPTQKPTSTPAPTPMDGQLIKSLTVKDSANSSNWSIQSNLRVGDTVFGDRTYKFVTIPNEFL…
118	α-L-rhamnosidase	Rhamnogalacturonases	3.2.1.40	p-nitrophenyl α-L-rhamnopyranoside	Bacteroides thetaiotaomicron	GH145	49.32	MKRTLLLTFLLLSVSALCFSQKLVEVAKGYSCTSVNTTIFRNNSLVTHGDEQYISYYDADGYLVLGKRKL NSKQWTLHRTQYRGNVKDAHNIISIMVDGEGYLHVSFDHHGHKLNYCRSIAPGSLELGDKMPMTGVDEGN VTYPEFYPLTDGDLLFVYRSGSSGRGNLVMNRYSLKDHKWARVQDVLIDGEDKRNAYWQLYVDEKGTIHL SWVWRETWQVETNHDLCYARSFDNGVTWYKSDGEQYKLPITASNAEYACRIPQNSELINQTSMSADAGGN PYIATYWRSSDSEVPQYRIVWNDGKTWHNRQVTDRKTPFTLKGGGTKMIPVARPRIVVEDGEIFYIFRDE ERGSRVSMAHTADVANGKWIVTDLTDFSVDAWEPSHDTELWKKQ…
119	D-4,5-unsaturated β-glucuronyl hydrolase (BT3687)	Glycoside Hydrolases	3.2.1.-	Hydrolase activity	Bacteroides thetaiotaomicron	GH105	43.49	MKKLYATLFSALVVGCAVCAGCTTKKVSSSAEVVDIIHKVNGYWQTNHPEHGRSFWDNAAYHTGNMEAYFLTNKPEYLEYSKGWAEHNEWKGAKSDHKANWKYSYGESNDYVLFGDYQICFQTYADLYNLEPDTHKIARAREVMEYQMSTPNNDYWWWADGLYMVMPVMTKLYNITKNPLYLEKLHEYLAYADSIMYDEEAGLYYRDGKYVYPKHKSVNGKKDFWARGDGWVLAGLAKVLKDLPETDKYRQEYIDRFRTLAKSVAACQQPEGYWTRSMLDAQHAPGPETSGTAFFTYGLQWGVNNGFLDSAHYQPVVEKAWKYLSTVALQPDGKIGYVQPIGEKAIPGQVVDANSTSNFGVGAFLLAACERVRYLESLIQH
120	Endo-1,4-β-xylanase	Xylanases	3.2.1.8	(1,4)-β-D-xylosidic linkages in xylans	Thermotoga maritima MSB8	GH10	46.5871	MQVRKRRGLLDVSTAVLVGILAGFLGVVLAASGVLSFGKEASSKGDSSLETVLALSFEGTTEGVVPFGKDVVLTASQDVAADGEYSLKVENRTSPWDGVEIDLTGKVKSGADYLLSFQVYQSSDAPQLFNVVARTEDEKGERYDVILDKVVVSDHWKEILVPFSPTFEGTPAKYSLIIVASKNTNFNFYLDKVQVLAPKESGPKVIYETSFENGVGDWQPRGDVNIEASSEVAHSGKSSLFISNRQKGWQGAQINLKGILKTGKTYAFEAWVYQNSGQDQTIIMTMQRKYSSDASTQYEWIKSATVPSGQWVQLSGTYTIPAGVTVEDLTLYFESQNPTLEFYVDDVKIVDTTSAEIKIEMEPEKEIPALKEVLKDYFKVGVALPSKVFLNPKDIELIT…
121	Endo-1,4-β-xylanase	Xylanases	3.2.1.8	(1,4)-β-D-xylosidic linkages in xylans	Thermotoga maritima MSB9	GH10	40.479	MKILPSVLILLLGCVPVFSSQNVSLRELAEKLNIYIGFAAINNFWSLSDAEKYMEVARREFNILTPENQMKWDTIHPERDRYNFTPAEKHVEFAEENDMIVHGHTLVWHNQLPGWITGREWTKEELLNVLEDHIKTVVSHFKGRVKIWDVVNEAVSDSGTYRESVWYKTIGPEYIEKAFRWAKEADPDAILIYNDYSIEEINAKSNFVYNMIKELKEKGVPVDGIGFQMHIDYRGLNYDSFRRNLERFAKLGLQIYITEMDVRIPLSGSEEYYLKKQAEVCAKIFDICLDNPAVKAIQFWGFTDKYSWVPGFFKGYGKALLFDENYNPKPCYYAIKEVLEKKIEERK
122	Endo-α-1,4-L-fucoidanase	α-1,4-Fucanase	3.2.1.212	(1,4)-α-L-fucoside linkages in fucan	Psychromonas sp.	GH107	46.3791	MLIGCGGSSANQTQSTSDQDSSEVNETVSLDSEYTANWMAGAWGITQRVDGGYKLDASVETGKYDWVAGAEEIVENIPSAGYVITSFTHPAHGFLYTLRDNENVDVAAIHPDMVPSLENEKIIFDVINVYKSAGKKVLLYLNTAGPTHAADRNSPEIQDAWDDYVNTNWNGDHGAAWRNLVEGYAKRFKGLVDGFWLDNSKNMAGGQKEIPEFVAMLRDIDPSFAIGVNYETHYFEDEDGNYLKVASDSIDDNDDREYKIIKHVVTNEYMDFTNGHVTPMGQGAPPNSWGYEEYTIPHMIEKPWDSVDGNHYALMHGWFPIRFSWSGSGAELMFETEQAYRFVRTITDGGAAMTWSTTQKKGYMSADEMDIMIEINNRMTQAPKLDYEAYERPEGAYLV…
123	Endo-α-1,4-L-fucoidanase	α-1,4-Fucanase	3.2.1.212	(1,4)-α-L-fucoside linkages in fucan	Wenyingzhuangia fucanilytica	GH107	38.6263	MLSNIIQAQVFYDKTSSSEVLSIEGGAVWDLSSNGDFVYNNNGSNFQNRALIYSTSAYQSEDGFKLTIEYTTESIEDVVSHNFSFGLISDETNLSSYLGFNPFRANESVYSIGANLTTNEDATARGLNFTNGNERVTLDESGSRTQFGEGGITKVTIEIGIGGYWSYRINDIYEDSGVLLEGFDLSKNYHVAVYGQSNNGKSIQSITLEKRYALGERAVNLRGTWNSEILVDLLDDRIKNLKTLNRLGVSFTNGAVLSAEHKVPHKLFDRLSGGDVVAPSWGDLNSDTPDNDNMLADILKIKAAGFNVKAYTNSENFVGTNADYLQPFVDSWKEYCDTDPEVQAFINSQPYHTGIWNRTTEQYEDATATYPNRKYMFCYAEYFLKDYALRYGEHFDSWI…
124	Endo-1,3-β-D-glucosidase/Laminarinase	1,3-β-Glucanases	3.2.1.39	Laminarin	Marinifilaceae bacterium SPP2	GH157	61.4383	MKRSLVLIIILFLVPVISGYSQSKTKIELKDNWYHLDGEKYFIKAIGYEIGARPGQAPYEDERKDELELMKFDLENIKEGGYNTIRTWSQYSENQLKLVQESGLKLIMGIDIKPEEDYGDPEFVKDSEIELKRVLNYAKKYDCIITYLVINEPQTDHIHSVTGKAFVDLMNTLINIIHKGHPGIPVTLSANAMISDYMDESIFDVYAYNCYDHNEGQTATMGFKDYIKGLNELNGLDKPFITTEFGYSVSPEGGNGQYGSNTLKQQSDGLISNYRDLIDAGAVGMCPFYYADGWWKGGEKSDHSLNQPEEWFGFWGYSDLNDKYGTPRPVWFAMRDYMKGLIISPKNKSIHTNTKIPLELYNDKDVKKVVVKFRDKVIYSKNITSEGYMADELTIDPVG…
125	Endo-1,3-β-D-glucosidase/Laminarinase	1,3-β-Glucanases	3.2.1.39	Laminarin	Polaribacter sp. KT25b	GH157	62.9693	MKPNLALASILSLFLLIIGCSQPETTIIKESSATTIELKDNWYYLNGEKFFIKAIGYEIGARPGQHPYEDEKKDHLELMKFDLENIKKGGYNAIRTWSQFSEAQLQLVQESGLKLIMGLEVNPEEDYSDPKFINHCKTQLENILKYAPKYDCIITYLVINEPQTDHIHKVSASSFKDLMKMMIDMIHEQHPNIPVTLSANAMISDWMDESMYDVYAYNCYGYNEGQTATMGFRDYIKGLNTLNGLDKPFIITEFGHSVSPKGGFGSFGSRTLQEQSEGLISNYRDLIDAGSVGMCPFYYADGWWKGGEKSIHNKEQPEEWFGFWGYKDVNDKYGSPRPVWFAMRDYMKGLIISPKNKTVHTNTTIPIELYNDNSIKKVVVKNRDKIIYSKNITKEGYFS…
126	α-mannosidase	Mannosidases	3.2.1.24	α-D-mannose residues	Thermotoga maritima MSB10	GH38	32.748	MKGRLWRMLSEIVPYTVLRRERIESWIFSDDAVERIVDPSFEWDFSSAPVRFRKELEPFSVAGEQRAYLKLWFGGETLVLIDGKPYGEINEYHRMLNITPLADGKPHTIEAQVMPRGLFGKPEKPVFTEAFFIVVDEALMKVVKTLELTIKTAEVIEDESLSKKLLDISEEFLSKVWIPRDTGTYLMTALEDPGIKDEIKNTWNTPEFKEFTGVKLPEELRNQILEEFEKFKEKLDRIRKNHPGFGTIHLVGHAHIDYAWLWPVEETKRKILRTFANSVLLSKLYPEFVYTQSSAQMYEDLKQNSPELFEEVRKLVEEGRWEPVGGMWVESDCNVPSIESLVRQFYYGQKFFEREFGKKSKVCWLPDVFGFSWVLPQILKEAGIKYFVTTKLNWNDTNE…
127	β-mannosidase	Mannosidases	3.2.1.25	β-D-mannose residues	Thermotoga maritima MSB11	GH2	45.2047	MKRIDLNGFWSVRDNEGRFSFEGTVPGVVQADLVRKGLLPHPYVGMNEDLFKEIEDREWIYEREFEFKEDVKEGERVDLVFEGVDTLSDVYLNGVYLGSTEDMFIEYRFDVTNVLKEKNHLKVYIKSPIRVPKTLEQNYGVLGGPEDPIRGYIRKAQYSYGWDWGARIVTSGIWKPVYLEVYRARLQDSTAYLLELEGKDALVRVNGFVHGEGNLIVEVYVNGEKIGEFPVLEKNGEKLFDGVFHLKDVKLWYPWNVGKPYLYDFVFVLKDLNGEIYREEKKIGLRRVRIVQEPDEEGKTFIFEINGEKVFAKGANWIPSENILTWLKEEDYEKLVKMARSANMNMLRVWGGGIYEREIFYRLCDELGIMVWQDFMYACLEYPDHLPWFRKLANEEARK…
128	α-L-fucosidase	Fucosidases	3.2.1.51	α-L-fucoside	Zobellia galactanivorans	GH95	89.2201	MIKPFAYSLKIASVLPVLFSLVSVNLLSSQSAHTLWFDRPAEHFEETLVLGNGKAGASIFGGVATDSIYLNDATLWSGEPVDPYMNPEAYKNLPAIREALKNENYKLADSLQSKLQGSFSQSYMPLGTVYLNFEHKNQPQSYHRQLELEKALSTVTYKVDGVTFTREYFISHADQAMVIRLKSSKKGALNFNIGFNSLLKYELATNGPTLEVNGYAPYHVEPSYRGKMPNPVQFDPNRGTRFTSLFRIKHTDGKLIGTDNTVALKDATEAVVYVSIATSFNGFDKNPATEGLDHKAMASSQLSKASSKPFDALFEAHLKDHQKYFNRVHLDLGKSTAEDLPTDERLKRYAKGEEDKNLEVLYFQYGRYLLISSSRTPNVPANLQGIWNPYIRPPWSSNY…
129	α-L-fucosidase	Fucosidases	3.2.1.51	α-L-fucoside	Zobellia galactanivorans	GH95	69.4115	MRNSLKMVRALLVLCIGTIMGSCGEIPEVEVKLDWPSFLSDHDLVWEQLPEAYTEGAFMGNGMLGNMLYKVPGKNAIRMEICRSDVQDHRGDDQGETPYSRGRLPIGHFLLVPKGEIEEASMRLDLWNAETSAKIRTSAGEILLRSYVHAESMLVVTEVNATEGENGFEWKWEGEKAISPRQLWGIDKDQPFRVFEGYKENPPFELGETEGISYCLQPLLESGQTVTAWKEIDTGKGRTLVVNVSHSWPDNKAKDLAVATVAQTRAKHFSELERSHRQWWHNYYPQSFVSIPDNKFESFYWIQMYKLASATRKDRAYIDNHGPWLEKTAWPYATWNLNVQLTYWPVYTSNRLPLGESLLNALWDNRENLRNNLPEVYRKESYGIGRAAGTDCIASVGIP…
130	α-L-fucosidase	Fucosidases	3.2.1.51	α-L-fucoside	Zobellia galactanivorans	GH95	86.8286	MRFLNLSSFTNSIALLCLCLFLGCAEKPKETGGKAELKLWYDRPAEIWEEALPVGNGSLGAMVFGRPVMERIQFNEDTFWAGGPITPSKPETKSYLPEVRKLVFDGKYKEADALINKHIIGPKMMPYLPMGDVVIEMKGLDDITDFRRELDLRTAISKVGFSSKGIAYKREVFSAVEENAIVIRLEASKEKSLNFSIALDNQIGATSQVLDANNLELSGTAPDRANRKSELRFVSRLNIGENDGHTIINDSTITVSGASKVTLLLFAATNFKNYKDVSGNPDFKCKTLLDLVHLKSFEQIREQHITNHQRLFERLDFDMPTNSNSGLPTNERLEKFQEETDPSLVALYYQFGRYLLMSSSRGNSQPANLQGIWNQNPTPPWDSKYTTNINLEMNYWPAE…
131	α-L-fucosidase	Fucosidases	3.2.1.51	α-L-fucoside	Zobellia galactanivorans	GH95	86.2097	MQYNYKFISAVLLLFFSLGQQALLAQTSPIGMKNGNKLWYTQPAADWMEALPIGNGKLGAMVFGGVESERLQLNEESVWAGPPIPENRVGAFKSIEKARALIFQGDYLEANKVMQDNVMGERIAPRSYQPLGNLILNFNLKGSPTDYRRELDLKRAIAKTDFTVNGVRYTREYFSSAIENTIVVVLTANQPKAISLELKMDRKADFEVAGVGKNRLRMWGQASQKGKHLGVKYETQVMALPKGGKMSSENGNIKITAANSVVLLVSAKTDYNKKDPFSPFTENLSTACASVLKKTARKSVKKLKEEHIDDYQHYFNRVVLDLGSFPGEDKPTNERLEAVINGADDPGLMELYFQYGRYLLISSSRPGSLPANLQGIWNDHLAAPWNSDYHTNINMQMNY…
132	α-L-fucosidase	Fucosidases	3.2.1.51	α-L-fucoside	Zobellia galactanivorans	GH95	88.7938	MGMMTKKTIHILGGLLLLISFSAWSQEKEVVQNKALTLWYTSPAKKWTDAFPLGNGRLAAMTFGGVAQERFQLNEESLWAGVPSNPFAEDYRAKLTKLQKLILEGKTLEANAFGLENMTAAPASFRSYEPLGDIVLDFKDTTHISNYKRALDLETGISKVTYRTEDSEMVRESFISAEDDALFIRLSAKGSKKINCTISLARPKDVRITATPEGKLYMLGQIVDIEAPEAHDENAGGSGEGGEHMSFAAGLQTKVSGGKLCHTEHNLVIENADEVLIAYTAATNYDLSKLNFDASVDPSLKVRGILEKLDQKSWKELEYTHREEHRNMFDRVQFDLGTSPNDSLPTDERLLAFKNGAKDTGLPVQLFQFGRYLLMGSSRGPAVLPANLQGKWSERMWAP…
133	α-L-fucosidase	Fucosidases	3.2.1.51	α-L-fucoside	Zobellia galactanivorans	GH95	90.2546	MSSIMRLKRTILLTLICTSSVLIAQNTDSKENGFDPATVLWYDKPASMWEEALPVGNGRIGAMVYGKSGEEKIQFNEETYWSGGPYSQVVKGGYKKLPEIQKYIFNGEPIKAHKLFGRALMGYPVEQQKYQSLANLHLFFGQDSVDNYRRSLDLKTGVVTVEYTYGGVNYTKEVFASAVDQTIAIRITADKPGSINFDAELRGVRNSAHSNYATDYFRMDGLGKDQLKLTGKSADYMGVEGKLRYEARIKAVPEGGTMSIDGTMLSIKNADAATLYFVAATNFVNYKDVSADENKRVEDMLAKVQQSSFDAIKKSALADYKEYFDRVSLTLPTTDNSFLPTDKRMVEIQSSPDPQLSTLCYNFGRYLLISSSRPGTQPANLQGIWNNDMNPAWDSKYTT…
134	α-L-fucosidase	Fucosidases	3.2.1.51	α-L-fucoside	Zobellia galactanivorans	GH29	53.0723	MKIIRATILALLCCLEVASQTPETTSNRYGKLLQDFVDMRFGMFLCYNIMSYGASWGEANYDISTFNPKNLNTAQWADAAVSAQMKFGLLTTKHHEGFCLWDSKVTDYDVASTPYKKDIVKQYVESFRKKGLKVGLYYSIWDSTHGIDKDKIGPKELDFIKTQITELLTNYGKIDYFVVDGWFWRMGHHEVPFSEIRELIRKLQPDCLLTDHTHLQAPYQLDIPYFEGPFGAFPKEDNQMASALGHCSFKGNGWFWSPETPNGMFKKESTEKLVSKLKTLESRYCNFMLNCMPNRDGLLDPAFISLLSDIGKKWSPNESRIDLPLKKRLIYSAPIVRATASSGEASYLIDATQYKTDFKHWVSDASSIQTLTFDLGRPKNIDIITLVPNHKSKPAPETA…
135	α-L-fucosidase	Fucosidases	3.2.1.51	α-L-fucoside	Zobellia galactanivorans	GH29	57.1813	MKKYVAILLIAFTHLGLAQQKFKPEWESLKQHKAAPDWFADAKLGVYFHWGVYSVPAWGSEWYPRWMYIYDREGWGEDIYDYHKTTYGKDFQYHDFIPQWKGEKFNAVEWVDMFEGMGARFIGSIAEHHDGFSLWDSKVNEWNSKAMGPGIDVVKAIGEETKKRKLKFMATFHHGFHMMFYPKNENTFLRPVSQFNWVYDSVEVPQAPKYRKLYGNLGYDEANDLWLEKLNEVIEAHCPDYIWMDFGQRFIKEGHRKQFLANYFNKAEALGKEVVVNTKGTFFPTELAVVNVERATMEDITPDVWITDFILGSSWCYNQAKRTAINPHKAIRMLAEVVSKNGVMLLSAGPMADGTIPEEQVKAMEGIGAWLKLYGEAIYNTKPFVAFGEGPTILKRDPK…
136	α-L-fucosidase	Fucosidases	3.2.1.51	α-L-fucoside	Zobellia galactanivorans	GH29	47.5901	MNSKYHLFALLLVQALIGPKSAFAQEIDFKPTYESLKQYTTPEWFRDAKFGIWSHWGPQSVPERGDWYARFMYLQGVLDWGEKFDVNESHTKRYGHPSEFGYKDLIPLFTAEKWNPEKLMELYQKAGARYFVSMGQHHDNFDMWNSKLQPWNSVNMGPKRDIVKEWQDAAKKNGMPFGVSFHGEAAWTFFESSRLSDHKGPFQGVPYDGWQTKEDGKGKWWEGYDPRDLYGQPHKPKLPANVKYAEEVVEEGEPPSDAFLDNFIGRVYDVLDQYHPELIYFDSGHFPAGKARGTKLIADFYNMSQKWNKGINQAVVNAKHLTDEEQQMFMLDFENTHSSEVRKLPWQTDIGFDGWFYLEKEKEDYLPTQDVIHTLADIVSKNGNMLLNITQSANGEIHP…
137	α-L-fucosidase	Fucosidases	3.2.1.51	α-L-fucoside	Zobellia galactanivorans	GH29	56.0322	MTTKNKFVSQVAMTLLLFMGITALHAQLQPKKFQAEWESIRAGYEIPEWFRDAKFGIFLHWGPYAVPAYSSEKYPRGIYDEKWSKGGKKPYTYHRAHYGDPSKFGYKDFIPDFKAEKFDAEEWAALFKNAGARYVVPVAEHHDGYAMYASKHTRWNVKDTGPKKDVMRMLSDAVKAKGMKFGVSSHFARHRVYYRKDDPTWDTNNPEFYDLYGEPIGNDTLPTKKFLNLWWNRTTDIIDNYEPDLLWFDFGLDKPGFEVVHKKILAYYYNKGEEWNKGVVFQNKNMRNKSFPEDLIVLDIERGRMDGIFKYPWQTDTSIGKISWGYVTNEEYKTSNYLLDELIDIVSKNGCLLLNIGPKADGTIPDEAQKILNEMGQWLSLNGEAIYDTRPWTIFGEGP…
138	α-L-fucosidase	Fucosidases	3.2.1.51	α-L-fucoside	Zobellia galactanivorans	GH29	54.7903	MKIVKIVALFLIATHIQAQTTIDKKSKPLPELQLDFVNTRYQAYFHYNMATFNNVNSEEKQGRAYGKVAPTTWAPTGLDTDQWAQVVKDARMTGGWLTTKHHGGFCLWDSAYTDYDVASSGVKTDVVKAFVDSFRKAGLKVGLYYSILDYHHKVENGSTSRAEIEFTKNQIRELLTNYGPIDYINFDGWSSWPTNPDFDDMPYGEIYALVKSLQPNCLIVNHTYESNLAHAEVPFADAAGRAYPYHKDYMRPTAASDFIQRGWWWDNNNGFGVSKSVDYLLKQLNSYNSHNSVYILNISPNPEGRIDEDVITRLKETAAVWQKPAPLEKPGSDWGFSYEVSENLAFLKPCSQSTTHPYINDKRAYPRADIAVDGVTEGNWEMEQTSGTKQQMNPWWMVD…
139	α-L-fucosidase	Fucosidases	3.2.1.51	α-L-fucoside	Zobellia galactanivorans	GH29	56.263	MIKMIHTNRGKLFLLTLLLSLQGFAQKPYEANWKSIDSRPVPEWYTDAKFGIFIHWGPYSVPAFSKVGEYSEWYWMNLANPQRVKNGYKETNEFHNRVYGENFTYPDFVPLFTADMYDADQWARIFEKSGAKYVVLTSKHHDGYTLWPSKESDKSWGRPWSATNSGPGRDLLGELTTAVRKTDVKMGIYYSLYEWFNPLYTSDVDLYVDQHMVPQFKDVVNKYSPSLIFTDGEWDYPHTTWKATELLSWLYNESPSKEDVVINDRWGKETRHHHGGYYTTEYGSGMPNADVPWEENRGMAHSFGFSKTENFEDYNSTQELLYMLIDIVSRGGNFLLDIGPTADGRIPVIMQERLLEMGDWLNVNGEAIYGTTLWKETCQWTDGQVQDAKRGRYKVKYDV…
140	Alginate lyase / Poly(β-mannuronate) lyase	Alginate lyases	4.2.2.3	Alginates	Pseudomonas fluorescens	-	40.6169	MRNPKLKTLLAPTLLGLAIFAGTAQAAAPLRPPQGYFAPVDKFKTGDKSEGCDAMPTPYTGPLQFRSKYEGSDKARATLNVQSEKAFRDTTKDITTLERGTAKRVMQFMRDGRPEQLDCTLNWLTAWAKADALMSKDFNHTGKSMRKWALGSMASSYIRLKFSDSHPLAQHQQEAQVIEAWFSKMADQVVSDWDNLPLEKTNNHSYWAAWSVMATSVATNRRDLFDWAVKEYKVGVNQVDADGFLPNELKRQQRALAYHNYALPPLAMIASFAQVNGVDLRQENNGALKRLGDRVLAGVKDPDQFEKKNGKEQDMTDLKQDMKFAWLEPFCTLYTCSPDVIEKKHGMQPFKTFRLGGDLTKVYDPSHEKGNKGS
141	Polysaccharide lyase / Alginate Lyase	Alginate lyases	4.2.2.-	Alginates	Zobellia galactanivorans	PL12	17.0631	MSLPEVVYRVRTALKKKKDQRFKMGYLPKGNLNHLPKPLFFAPRTEEEIVLRDYSIFGHGLNYQQAIDWHKDLMDGREFPKKFSFDIDTRSGKNGTVKVVWEVNRLQYLVHICHKYHQSKDKKYLDLFVQHIEDWHKANPYLTGVNWYSNIEVNIRIINWVFCWEMIGANELMASDADFKKFAETTWLPLIELHARHAYRYESKYSSSNNHLIAEASGLFIAGCYWSFKDSDRWVKKGQAILEEEIEKQHSANGINKEEASEYIQFITDFFLIAFLIGERSGHGFSKTYTHTLKTIFDYIYHLMDMGGNVPYYGDDDDGKVISLTTDESHFNNFRSLLTSAAIVFKDPKYKGKAPLFDLKNQVLFGDAGRQIFDSLVVPQKVEPKTVLYKNEGHFFIKK…
142	Alginate lyase / Poly(β-mannuronate) lyase	Alginate lyases	4.2.2.3	Alginates	Zobellia galactanivorans	PL7	33.8669	MQFLSNFFRACYLSLVLVSAGNCQDSNDLAVAANHQDGPYANSDTPETESVDIKKYKLPKIDLSHWKLTLPVGKPTEVEPPEILEYATNEVVRPYFYNDSTDGSLVFYAFPNSTTANTKYSRSELREQMVPGDNNVNWTFEQGGRMKGTLAVDEITKDSDGKYHRTIIMQIHGRLTNEQKELIGAKDNNAPPILKIYWDKGYVRVKTKVLKNKSASDQEILHEEAWGDDEGYTFPDYVGFKKFKLEVKVSKGKLVVIMNNTEYAVYDDVNIKRWGIFENYFKAGNYFQSKDEGSYAKVKFYDLEVIH
143	Alginate lyase / Poly(β-mannuronate) lyase	Alginate lyases	4.2.2.3	Alginates	Zobellia galactanivorans	PL17	26.3341	MNMTKYIPVLQSLLFVLLLSFSGHAQEHPSLILTKAGVEKIRAELGNIPIFDATLEKVKAEVDAEIALGIDTPLPKDYSGGYTHERHKRNFFILQKAGVLYQILNDEKYALYIKDMLFQYEGMYKDLPVHPQTRSYARGKLFWQCLNDSNWLVYVSQAYDCVYDYLSKKERKQLEKNLFRPFADYISIENPQFYNRVHNHSTWGNAAVGMIGLVMGDEELIQRALYGIEDDGLPIGAKDNDGGFIKVEGQKAGFLANIDEPFSPDGYYTEGPYYQRYAMYPFLIFAEALHNVRPQQKIFEHKDGVLLKSVNTLLSLSDADGEFFPLNDAQKGMSYHSRELVTAVDIAYHYGNHNPQLLSIAEEQGQVLLDDSGLAVALGIREGKSEDFQKKSIKLSDGA…
144	Alginate lyase / Poly(β-mannuronate) lyase	Alginate lyases	4.2.2.3	Alginates	Zobellia galactanivorans	PL6	88.1394	MTKQILSVSNMTKASLLVLSVVLSLFSFIENPNDKGIYVKNSTELNEAIDQANPGDEIIMANGDWNDVQIRFLGYGKEGQPITLKAETPGKVFIGGKSDLKLGGEYLVVNGLYFINGASPSNAVIEFAINEDTVANHSRITNSVILDFNKAQRNETDLWVLFKGRHNQLDHCYIAGKSNRGPTVRIDLAGNQNIKNYHKINNNYFGPRPPKGGPSAETIQLGNSYTSMTPSHTLVAHNFFDRCNGEVEVISSKSNFNEFRNNVFYKSEGSLVTRHGNYCIIDGNYFIGDTNSEQIGGVRLIGTGHWVTNNYFYNLKGKTFRSPLAVMNGIPKSPLNRYIQVTDVVVVHNTWVNCTSPLQFGVGSNVDQKDILPASEIRSERPIRTIVANNLIYSDKGDK…
145	Alginate lyase / Poly(β-mannuronate) lyase	Alginate lyases	4.2.2.3	Alginates	Zobellia galactanivorans	PL6	85.1447	MRHLHNFFSFIFLLGTFSFVTAQQKNTVKNVAEFNEALRTVQPGDSIVLANGIWKDSELLFEAEGTAEKPITLTVEEKGKVTLEGESNLRMAGNHLIVKGLIFKNGHTPTNAVISFRKDREKMANHSRLTECVIDNFNNPERQVQDYWITIYGKNNRIDHNHIVGKKNLGVTMIVGLDTEGSRANNHKIDHNYFGPRPTYGNNGGETLRIGTSHHAMENSNTLVESNYFDRCNGEHEIISNKSCQNTFKYNTFFECTGTLTMRHGNETLVDGNVFIGNGKPSTGGVRVINESQTVINNYHIGLTGYRFRGAFVMMNGVPNSPPNRYVPVIDSKVNNNTFVNCENILFGAGSDEERSQAPQTSEFSRNIIYNDTKKDIFTINDDISGISFKNNILGKNSE…
146	Alginate lyase / Poly(β-mannuronate) lyase	Alginate lyases	4.2.2.3	Alginates	Zobellia galactanivorans	PL14	44.5121	MKRKLSIVSLCFVLVLFTVTKTKAQTADVYHFNFDELPTGPYDKDQIKDALGVSFCKGADEGRVSIESFPDQGKTLKVKYPKGQVKTGESGIHTKVYFNDGQFHDELYMSYKVYFPSDFEFRAGGKLPGLSYQTSDRNMSLRLMWRKNGLVETYVHYNTKPTRPDYKASINWSLTDPIEEANGGPQADQVKFTKGTWQHIEMYYKLNTPGKQDGIMRGWLNGQLALEITNVEDFRQVGEGDIGLNSFYLSSFFGGSDESFQPTKDVYAYFDDFKVSTHRIGPPSRTGNELQIGASANEAQQSLQNPSDTSDTEVKIYPNPVLDGILYLEGIDADTKNISIYSMMGYRVKSWVPDTSTKTPSIDLGQLDTGTYIMVIESNKRKITKMIYKV
147	Endo-1,3-β-glucanase / Laminarinase	1,3-β-Glucanases	3.2.1.39	Laminarin	Zobellia galactanivorans	GH64	42.5245	MKTFYFTLLYLILGGALLSAQTLPYQIANNSEFPDDEVYVAVVGEIGGFVWVDPVNGQVNRMSRSDNTVPGPVINGNLGPGLDGRYANCFRKLSDIPNKTVNIPKIAGCRILISFGSPLYLYFFGYDGDPRGYAAPNLENPTDPNQGITFESIELTYNEFGIFNNTSRVDAFQHPIGLEVEGVDFFKKVGELKSSQEIQDAWARTAPPEFQGLLKRDQGIIKFPTKDDSFPADYMDGYIDAIWSKYRNAELYFNAGDAGRWRGRVQGANFVFERESDGQVATIPGKPTTLMAMEGSGVMASGQRWDLVVQAQMVAAITRHAIDLNAPSGAFQDFGDASRYYQVEPYNWYSKFFHRADISFEGQTYTFAYDDVFDQSSTISTGQPLRAKITLGPIEGDGD…
148	Endo-1,3-β-glucanase / Laminarinase	1,3-β-Glucanases	3.2.1.39	Laminarin	Zobellia galactanivorans	GH16	83.0307	MGTPMYLKSILLVFIWSILVLSSVQAQVGQVLWEDNFDTFDESLWTPDIGDGCAQGICGWGNQELQSYESDNVYIEDVPGEPGNKALVIEAKRENSGSKSFTSGKVTTNKKVAIHYGLIEVRVRVPDLQTGLWPAVWLLGTSNLVWPAKGEIDMMEMGFNQEERTRQLEPNSTVNTYTGANAFFPIPDNGGVGNIAYDVDYNTPYVADRPLNDRFVTYKLYWEPTSLRFVVEDDGTEYDLYAGPLPLDPEGDTAAFTRPFYMLLNLAVGGSLTGVLDPNGINAPLPGKMMVDYVRVSEYNGHGSVEFGDGSDDLVAESGNFGVFTENTPVANGLNFGSDADIFVFSDTFAEGSEAPYEGEEVISWETSSSNTWFGAGITSLFGKNMSNYVEEGTMKFKI…
149	α-L-rhamnosidase	Rhamnosidases	3.2.1.40	α-L-rhamnose residues in α-L-rhamnosides	Zobellia galactanivorans	GH78	57.3283	MNLFLSIFLFCSPLFLLGQSELNYPELLYPPQAIKANWVSHPDIQGGEDRIVLFRNEWMVDDPSEAFIINISADNHYFLYVNGNLVTHGPQLSDIRHWKYETIDLKTYLKTGKNLIAIKVVNYGKRRFYGMQSIFTSLMVNGATENAKVLNTSGTDDGWKCSIDDSYRALEVNWRGGGPKSIVGGFYANNPTDFVDKNHYPTDWEQPDFDDSDWVDTQFFEGASSMGGSMAYLLEPRNLPLLTWEKEGIGHTVRTSDIDVSEFPVSGKTVVPEHKKIRFLIDQKYVTNGFPELIFSKGKNAHIKIKYAENLFGPKNTKGDRNIIKGKELLGYYDHVVSNGKERQKFTPNWMRTFRFVEFEIETKGQELVLDSFSNYRSRTHIPSIARFSSNNETYNAIF…
150	1,4-β-xylosidase	Xylosidases	3.2.1.37	(1,4)-β-D-xylans / O-glycosyl compounds	Zobellia galactanivorans	GH43	49.4846	MPEEPIEHIDFNELNERAISKPLVKHIYTADPSAHVFDGKIYIYPSHDVESGIPFDDLGSHFAMEDYHVISMEDINGEAVDHGVALHVNDVPWAEKQMWAPDAAHKNGRYYLYFPARDYDGRFKIGVAVGNAPEGPFVPQPEAIKGSYSIDPAVFEDEDGSYYMYFGGIWGGQLQKYRNNTYDSSHELPRPNEAALLPIIAKLSDDMLEFAEEPKEVRILDEAGNLLLEGDNERRFFEASWVHKYRGKYYFSYSTGDTHYICYAMGDSPYGPFTYAGRILNPVVGWTSHHSICEVDGNWYLFYHDSSLSKGVTHLRSVKVAEIEYNQDGTIVTLDPYK
151	Endo-β-1,4-xylanase	Xylanases	3.2.1.8	(1,4)-β-D-xylosidic linkages in xylan / O-glycosyl compounds	Zobellia galactanivorans	GH10	31.1197	MLKTALLFLGILLFLLGCGKVKENKRNTVNELNSLKKLYEENFYIGAAVNDQIVTEKNAKALDVLKKEFNSISPENVMKWAEIHPTPDSFYFDMADKYVALGKKNKMHVVGHTLLWHSQIGPWMNSVKDSATMANYIRDHINTVATRYKGKIDSWDVVNEALNEDGSLRESIFLKVIGDRYLDMAFKLAEKADPEAKLYYNDYNMWKPEKRAGAIRVIENLQKNGIKIDGVGMQAHWSLTEPSLEEVENSIVAYANLGIKVAITELDVTVLPNPWELEGAEVSQNFENSEEMNPYTEGLPDSVQVQLAERYRDIFKLFLKHSDKIDRVTFWGVNDQSSWLNNWPINNRTNYPLLFDREYQTKKAYDAVIQLKTDSTDQH
152	β-galactosidase	Galactosidases	3.2.1.23	β-D-galactose residues in galactosides	Zobellia galactanivorans	GH2	32.7823	MLNSTPYKPSFGLFLPFLGLFLSISLQAQAPKWENPEWENPEIFQINREAPTASFYRYKTPENALQNDSWENSPFYRSLNGDWRFKYADNVMARPLDFQTADFDTSTWSTIPVPSNWELQGHGIPIYTNIVYPFPKNPPFIPHDKNPVGSYKRDFEISEDWNGKNIYLHFGGVSGAMYVWVNGQKVGYSEGSKTPAEFNITKYLKAGKNTLAVQVLRWSDASYMEDQDFWRLSGIDRNVYLYATETTTIKDYRAIADLENDYKDGLLKLNLKLENTGKKAKGYKVGVQLLDDGKVLYSEEKEVVFNQNSAVVEFDKSLKNIKSWNAEKPNLYTLLFTLKDRKGKVTEAINSKIGFRKIEIKNNQFLVNGQAVLIKGANLHDHDETTGHVISREATLKDM…
153	α-galactosidase	Galactosidases	3.2.1.22	α-D-galactose residues in galactosides	Zobellia galactanivorans	GH110	70.2063	MKNTSPYKNLIALTLCLVGIMGFSQSASLNEKVLFKTDIADDATPALLARIRQAKDHPISQIKFEKGTYHFYPDKAFERFTRISNHDDVMAKTALPLLGFKDLVIDGQGSTFIYHGRMIPFLIEGSENITVQNVTIDWAMPFHSEGTIVANDEKNNTFDIHFSDEYPYEIRNEQLIFLKEYYEHDLGQSILYDPIRNAIAFDTEAYTPITTIRNSKTQRNFDKIKYKYKVDPRSKVEKVRGKEDNLRVKEIKPGTVRIYNHRKKLPPVGMILVCKGDQSLNRLAPAFRISGTDGFNANNVTVNHAGGMGLIAENSSDLILDGFHVKPSHGRMVSTSADATHFVGCRGKVVLKNCTFNNQLDDATNVHGTYQEVVDILSENSIGVRMGHAQQQGFPIGTP…
154	Unsaturated glucuronyl hydrolase	Glucuronyl hydrolases	3.2.1.-	Oligosaccharides with unsaturated uronic acids	Zobellia galactanivorans	GH88	90.8365	MRVRLQLILFASFLMFSCASQKKETVQFSPEKILDENVKKIKDVQKTVKSVDQFPRNIHKGQTQWETVGPRDWCSGFWPGVLWYAYEHSQDSGLKTSAMKSTEALRQIAYSPAENHDIGFMLYCSYGNGYRLTGNEDYKEVLLAAADTLATLYNPNVGSILSWPIKKDEYKHNTIVDNMMNLELLFWAAKNGGSQHLYNLSESHAKVTMDNLVRDDASMFHLGSFDDETGEFLKGMTHQGYADDSMWARGQTWGIYGFAIAYRETGNKDFLNTAIRLTDHFLERLPEDGIPYWDFDDPKIPNAPKDASAAAIAACGMLELSELVEEKDQKKKYIQAAKDLIEKLSSDTYLSGDTNQALLLHSTGHHPRNSEIDMPIVYADYYYMEALLRLKKLGLSIKQ
155	α-L-rhamnosidase	Rhamnosidases	3.2.1.40	α-L-rhamnose residues in α-L-rhamnosides	Zobellia galactanivorans	GH78	45.8541	MEKMKRKKVNHDLFLIGAGVLVCLLTFYGFDSNDEAPALLDKKDLALLEPAKNEGAKFSGDPLLSSEEKAFTNAEWITYGREIPTADSLLYLAHPAPIFRKEFKSKGEISKATLYITSAGYYKGSINGEAIGKNVLDPAWTDYSKRTYYTAYEITQQLKEGSNCLGVILGNGFYNPLPLRKWGRRNLRTDLTVGKPTFIAQLVVAYKNGETDTINTDNTWKYTYGPIQKNSVYLGTVYDAKQEIENWNQPGFNDASWSKAIPDKGPGGKLQQAFFPPVQVTQTITPVAITNPEKGTYVIDMGVNFTGTYKIKLSGKVGDTINFRFGERIYDDGTLNPMTTVIGQIKKKGIGGPGAPEIAWQTDSYIVGKESPSWFEPEFTYHVYRYMEVKGLEKAPAVS…
156	Endo-polygalacturonase	Polygalacturonase	3.2.1.15	(1,4)-α-D- galactosiduronic linkages in pectate and other galacturonans	Zobellia galactanivorans	GH28	39.659	MKDKLHFTSLLIACMLFVGCNPKSDVYKATDFGAIANGKTVNTEAIQRAIDACNEGGGGTVILDKGDYVSGTLLLKDKVTLHIAEDAQLIGSSNPLDYQSIDTFTDATGQKRGNCLIGAKNATNIAVTGKGTIDGNGEAFLAKNIKAKIKELNLAQTEGFGSNRPFLLRFVNSSQIKVQDVHLRQPAAWTCHFYQSNDILVENVSIYSHAHKNNDGIDLDSSYDAIIKNCDINTGDDAICIKTTSPKPTYNVQVSDCKLRSDWGSIKFGTESMGDMYNIDITNCQIYDTKGGGIKVLSVDGANIHDVTIDGIQMDRVDMPIFIRLGERLRTYRNAEKQEVGSITDVIIKNVKGSARALDSSRVNPPSGILMTGTPNHKIGKILLENIELELPGGGIEEH…
157	Endo-polygalacturonase	Polygalacturonase	3.2.1.15	(1,4)-α-D- galactosiduronic linkages in pectate and other galacturonans	Zobellia galactanivorans	GH28	51.5091	MKISQFICFAICSLFYWQAVATDFNVLDYGAKADGVTVDTRAVQDAIDACTKNGGGRVLIPAGKTVVTGTIYLKDFVTLHIENGATLLGSPNYRDYATDTHKNMYKNEPHMDRCLIFAKDARSIAIEGYGTIDGNGHQKNFNKKKGGRPMMIRFVNVKDIHLNNITLINPAAWTSAWLYCDNISVSGITIISRVNNNGDGLDFDGCTNVRVTNSNFDNSDDSICLQASRPDKPCKNITVSNCHFSTKWGGMRIGLLSRGNIESVTVTNCTFKDIQDSGLKIQQCEGGEMKNMVFSNLVMENVPRPIFMTFAQQRASVDTPEGQLEPLKSMHNFSFSNIVVDNSKLDKNSTFFLTGFPGHRIEDITITDVQFTVSGGGTVEDAKKTDLKEYTQEVLNGWW…
158	Glucan endo-1,3-beta-D-glucosidase	Laminarinases	3.2.1.39	(1,3)-β-D-glucosidic linkages in (1,3)-β-D-glucans	Zobellia galactanivorans	GH16	60.0922	MQKSLFSKYLIPLIFIGLTLGSCDGNNKKTNDTEAEEESPAGYTLVWADEFDGKGEPNLDNWAYEIGFIRNNEAQYYTDNPKNIRVEDGFLIIESHKEKVENETFVSEEADNWTKNTEFGEYTSASITTKDLNEWKYGKVSVRAKLPKGTGTWPAIWMLGKNWKEVGWPKCGEIDIMEHVGYQSDSIFGTVHTEAFNHIKKTEVGKSVFIENPYDDFHEYSIEWTPEKIVFLLDGTAYHQFENQHKTNAEWPFDQPFHLKLNLAIGGSWGGLKGIDDSIFPQKMIIDYARVYQLQE
159	Unsaturated glucuronyl hydrolase	Glucuronyl hydrolases	3.2.1.-	Oligosaccharides with unsaturated uronic acids	Zobellia galactanivorans	GH88	42.8774	MKLTKIVLHAALAFLMCGCTFKKEGTKPDHKETTTVNVDEIVIKATKQLDLQSKVAEQANRIPRTVTPEGEMHWTGQQFDWTEGFFPGSLWYLFKASQDDIWKTRAEKFQALYEDHKYKTTNHDLGFVFNTSYGNGYLLTENEAFKEVMIVAADSLSSRFNPNVGCIKSWDVDRGWQASRGWLFPVIIDNMMNLELLFKVSEYTGDPKYKEIAITHAETTLKNHFRDDNSSYHVVDYDPETGAVRSKQTAQGISHESSWARGQAWGLYGYTICYRYTKNPEYLNMAKKIAAYIIGQKAQKNGIPYWDYHAENIPDEPYDVSAAAITASALLELNQYTNDTYKNEVETILTALASDEFTAPIGTNHNFILKHSVGSIPHKAEIDVPLNYADYYYLEALLR…
160	Mannosyl-oligosaccharide 1,2-α-mannosidase	Mannosidases	3.2.1.113	1,2-α-mannobiose on Man9GlcNAc2	Zobellia galactanivorans	GH92	69.8404	MNLFSKVSLYGICISLAVALSSCGAENQGPQTVEMVEPVDMVYPQLDTENSRWFFFSSASRPFGMVNLSPDTEVDGAWGSGYRYKVDTVQGFSHIHAWQLSGLSVMPVTIDDTNRKEIFTDFRSKFDHDKEKVSPGYHYLELEKYNINVELSSTTRVGLHKYAFPKKGKRPAVLFNLNGMLGPNKNTDGRLEIVGNGSLIGELLITETSRRPKPVKLFFAIDFNSGIDSIERDETTGNYLVFLKDGVDEVLMKAGISYTSVANAKANIDAELPHWDFYKVVQDSRKEWNGLLARIEVEGSTETARKRFYTDLWHGLQGRRIISDVNGAYPDNTGEEFRVGQLPLDDRGKPQFNHYNSDSFWGAQWTINTLWGLVYPEIMEEFVHSLLQYYKDGGMVPRG…
161	α-1,4-endofucoidanase precursor	Fucosidases	3.2.1.212	(1,4)-α-L-fucoside linkages in fucan	Mariniflexile fucanivorans	GH107	39.9801	LRAEWMRGALGMLWLPERTFNGNIEGIRIDDFLTQIKDIRTVDYVQLPLTSPNIFSPTHVAPHPIIESLWQGDTDANGDPINLVAPRESVDDPLLSWLKALRAAGLRTEIYVNSYNLLARIPEDTQADYPDVSARWMEWCDTNTEAQAFINSQTYHEGNGRRKYMFCYAEFILKEYAQRYGDLIDAWCFDSADNVMEDECGDDPASEDVNDQRIYQAFADACHAGNPNAAIAFNNSVGDREGNPFTSATLFDDYTFGHPFGGAGNMVVPEALYTYNHDLVVFMQTNNGYAFRDDTRTWNDNVVAHFFPKQSTTSWNAGNTPCLTDEQFVEWTSTGIVNGGGITW
162	Endo-fucoidan hydrolase	Fucosidases	3.2.1.212	(1,4)-α-L-fucoside linkages in fucan	Psychromonas sp.	GH107	45.4587	MLISVTVLVGCGSSSDEVESTNTTDSYNINNTEATGIEYNASWMAGTWGITQRVDGGYKLDNSADSSNWQAGAEEIVTNIPAAEYVITSFTHPAHGHLFTLRTNNNVDVSAIHPDMVPTLENEKIILDVINIYRAAGKKVILYLNSAGPSMAEERGDTDIQAAWDEYYINEWDGDEAAAWRNLARGYVERFDGLVDGYWLDNSRNLPGEVSDFVAMLRSVDPELTIAVNYDQHYFTDDNGEYLYVDSDGLDDEDESDYKIVKHVVTNEYMDFTNGHVTPLGRGAPPNSWAYEEYTIPDMIEVPWETYDGSKYALKHGWFPIRNSWSGSKAELMFDVEQAYRFVRTVTDGGAAMTWSTTQDNGYMTADEMSIMIEISNRMTQTPKPDYSVYERPKGAYLV…
163	Endo-(1,4)-fucoidanase	Fucosidases	3.2.1.212	(1,4)-α-L-fucoside linkages in fucan	Uncultured bacterium	GH107	41.3552	RGDWLRNSWGINWKPVDVYNGKSESLEIDIFLDQISHLKTIDYIQSHLGESSIKSSVHIAPHELLESFWQGDTDATGNPVNLVVPRASANVDPFLKILKKVKAAGMKNQVYVNSSNMLQRNESTPNPDYIPNITERWKAWVDGSAEAQAFIASQPYHTGTWDADTQSYVDATATYPERKYMFAYAEFVLKVYSERYGDLIDGWLFDSGSFMYSNGDSATNGVKEDQSLYGAFAKAAQAGNPNAPVSFNNSPERDTEELNPFSEATHYDDYMFGHPYNGGRVIGNHENGLYERNYAHIQKITATNGNVHSGSVAAGTDAHDWDWDDKVIGHFDPPMSTTSWNGGNTPALTDDEFNLWNLE
164	Endo-(1,4)-fucoidanase	Fucosidases	3.2.1.212	(1,4)-α-L-fucoside linkages in fucan	Uncultured bacterium	GH107	42.7489	RADWLRGSWGLNWKPTDLWNGAGEALTIDLFLEQISHLKTIDYVQVHLNESYINSPSHLGTHELLESFWQGDTSPLGTPMNLVVPRASTGVDPFLEMIKKSQKAGLKVQVYVNSSNLLTRGATFSNPASFPDITDRWKEWVDTNPEAQAFIHSQPYHTGIWDAESETYVDASETYPERKYMFAYAEFVLKEYAVRYGNLIDGWLFDSGDFMKKNGDNATNGVKAEQQIYKAFADACHAGNPMAAISFNNSPNRVTESLNPFSEATHYDDYMFGHPYNGGTFIGNHDNTNYDRNYRHIQKVSETNGNIHSGSLDAGTDSQNWDWDDKVVGHFDPPMSRTRWNSGADPGLSDEDFLLWNYESAVGGGAISW
165	Endo-(1,4)-fucoidanase	Fucosidases	3.2.1.212	(1,4)-α-L-fucoside linkages in fucan	Uncultured bacterium	GH107	38.5863	LESIKHFKTLTTMGASFSSGASASAQHNAPHKFLETIALKGVNGNGPAIDYVVAPSWGDLSLDEPESDPFLDNILAIKAAGFKIKAYLNSENFLGSNQDHLQEFVDRWKEYCDNDAVVQAFINSQPFHTSVWDTETQTYVDATETYPNRKYMFAYAEFVLKDYALRYAKYIDSWIFDDGGTMVENGDNATSGLVEEQRIYQAYANAVHAGNPEIPIAFNNGRSTTAYASTPFAHAVRFEDFTFGHAFGGNNNHAEKENGNQFNNNYRHVTRMTETNGYVHAGGNWEWDDRIVGNFHSKLSTTAWTYGPNQAWEEADFLQWNLEAMHAGGMMSW
166	Ulvan lyase hypothetical protein (BNR-4 repeat-containing protein)	Ulvan lyases	4.2.2.-	Ulvan	Pseudoalteromonas sp. PLSV	PL25	52.1457	MNLNKTLRKNSPSGYKALLTFSIICGLMATGCAHQESLPNSTANSVDRQVGYFADNGVGNPLAIVQHPAGIHKNGITYVSYQGPKEDPYIASYNHQTGQWQGPFRAGISELGRRDGGKKFDNHGKPTMLIDDEGYIHIFYGGHGGQASNGKNPLGNTHHGANKHAVSKRPYDISQWEDLNNITPFGTYNQAIKMDNGDIYLFFRHGAHRSDWVYQKSVDNGRTFASPVSFLKHKRRTDIDAVDSWYAWAGKGQGDNIIVSYDYHVCWDGGAGVNGRGHTTERHDVYFMSFNTKTGEWSNVEGEKLVLPVTREVADEKTMAMRTGELWTFNGSTHLDAQGQPHIAINAGIDKGAKTGGPKQTRHVRWNGNEWVGGDKVIPQYERVSRGDFMVTDPENIRY…
167	Ulvan lyase hypothetical protein	Ulvan lyases	4.2.2.-	Ulvan	Nonlabens ulvanivorans	PL25	52.7526	MIIKQYLLKISLCVLLLGCDSAKKEISKNENSKTEVDYFADNGFGNAVALVQHPSGVYHNGITYVAYQGPLEDPYVASYNHETKEWKGPFKAGISEMGKDPSRKKKIDNHGKPALLIDNAGYVHIAFGGHGGMRHHGENTLGNYSYGKNLHAVSKKPYDISEWETRDNVSLFGTYSQFIKMDNGDIYLFYRHGAHRSDWVYQKSMDNGVTFSEPVSFLKHKRRTNIEAEDSWYPWVSRGNADDIIVAFDYHICRDNVNAQDARGHIPERHNVYYMVFDTKNGQWKNVKNERLQMPLTKEMADEKTLVRSIPNDWTFQGITDVDPDGNPHVAVLVGPDINARRSGPKRLQHFRWDGQQWLKSNTANLPRGDGDLEVTSATEVSIYLENKTSNDVGEISRW…
168	Unsaturated rhamnogalacturonyl hydrolase identical protein	Rhamnogalacturonyl hydrolases	3.2.1.-	α-L-rhamnopyranose	Zobellia galactanivorans	GH105	41.4797	MNILEVLNPSKKTFTLKLLRHFFTAIIIFSCTGTSFSQKIKPKKVKETMQRVADWQIDHFDGLYSDHKKPHHPLDWTNGALYVGMVKWAAMADNDSYYEWLKKIGEENAWQLYRRKYHADDHTVGQMYIELYRKYKDEKMIAPTKEQFNFLMYHPSQSVLNWATPYHQDRWNWCDALFMSPPVWAKLYKVTGEEKYLDFMLSEFKASTDFLFDKEESLYYRDERYFDKLDNGTKVFWSRGNGWVFAGLVNIMNELEPQSEAYAYFLDIYKKMAEKLIAIQTSEGHWAMSLLGQEFYPTPETSGSSFYVYGLAWGINNGILDKKTYEPAVKKGWNAMVSHVTKDGMLGYVQPIGAAPGKAWPDKTEVYGTGAFLSAGSEVYKLYGGE
169	Unsaturated rhamnogalacturonyl hydrolase identical protein	Rhamnogalacturonyl hydrolases	3.2.1.-	α-L-rhamnopyranose	Zobellia galactanivorans	GH105	48.8781	MSFLHDKKEVERLIRLVADRIIEDTTYRFIDKASGETLDDLKTVAPTKDVWLKSGYEDWKYWNGVTHIALFKMAHLLQDQKYEDYVLRNFDFIFENLDFFEKQFADFDPEQYAPNFHQFFRLDRLDDCGAMDGSLIEAYQIRKNDHWLDRLQKVKAWVSSGQDRLQNGVFCRNYKGYTTVWADDVYMSVPFLVRMGKMSGDTSFWDDAISNALGFHELLFDDSKGLYWHSYCTQIGEKGVAHWGRANGWSIVAKCDLLEYIPKDYPGWEEVRKSLFEQIIGISRYQTANGMWRQLIDKPDSFLETSGTAMFTYAVAKAVNEKWIPEIYSSIAINGWKGISENIMADGQITNISEGFNIRQDLSYYYNRPRPLNDPHGLGAVLLAGVEIHKMKDYQDYMWY
170	Ulvan lyase hypothetical protein (BNR repeat-containing protein)	Ulvan lyases	4.2.2.-	Ulvan	Algibacter pectinivorans	PL25	52.1164	MILNKLCFKILFISFCFLGCASKTKEAKASIEENHMVDYFADNGFGNAVAIVQHPSGVYHKGITYVAYQGTLEDPYVASYSHKTKEWQGPFKAGISEMGKDPNRKKKIDNHGKPAILIDDAGYIHIAYGGHGGAPADGKNPLGNHHYGKNLHVVSKKPLDISSWQTLDNISVFGTYSQFVKMDNGNIYLFYRHGAHRSDWVYQKSIDNGITFDAPVSFLKHKRLQSIEAEDSWYPWVSKGNGDDIIVAFDYHICRDSKNAQDARGHIPERHNLYYMVFSTKTGVWKNVKNERLEIPLTKEMADEHTLVREIAEDWTFQGIADVDPNGNPQVCVLVGPDIGENRSGPKRIQHFRWDGKMWLKSENKDLPRGNGDLEVKSSNEVSIYLESVTNEGVGEISR…
172	Ulvan lyase hypothetical protein (BNR repeat-containing protein)	Ulvan lyases	4.2.2.-	Ulvan	Arenitalea lutea	PL25	52.6058	MNKLFFGILLICFCFLGCASKTKNVKVTTEENEMVDYFANNGFGNAVAIVQHPSGVYHKGITYVAYQGELEDPYVASYNHTTKEWKGPFKVGVSEMGKDPNRKKKIDNHGKPAILIDDDGYIHIAFGGHGGTPEDGKNSLGNHHYGKNLHAVSKKPLDISEWETLDNISLFGTYSQFIKMDNGDIYLFYRHGAHRSNWVYQKSTDNGVAFGEPVSFLKHKRRTDIEAEDSWYPWVSRGNGDDIIVAFDYHICRDNKNAQDLRGHIPERHNLYYMVFDTKTGQWKNVKNESLEMPLTKEMADEKALVSIIAEDWTFQGITDVDPKGIPHVGVMVGPDVGANRSGPKCLQYFRWDGQEWLKGDTSNLPKGDADLDVTSSKEVSLYLESQTQENIGEISRWD…
173	Ulvan lyase hypothetical protein	Ulvan lyases	4.2.2.-	Ulvan	Catenovulum agarivorans DS-2	PL25	53.4025	MKNPRIKRSLIPLASLFATSILLFGCGGTANTLSQAENTKVKVEYFANNALGNSLAVVQHPAGIHKNGITYVSYQGPLEDPYVASYNHDSGQWLGPFKAGISELGKDAEQPKKIDNHGKPTMIIDDLGYIHVFFGGHGGDKRHGKNPLGNIHYGGNKHAVSKRPYDITEWEELDNITPFGTYNQAVKMDNGDIYLFYRHGAHRSDWVYQKSTDHGRTFGPAVSFLKHKKRKDIAADDSWYAWVTKGHGDDIIISYDYHVCWNHKANNGRGHTTERHNVYYMVFNTKTGEWKNVNGKALQLPVTKEAADIHTLVASTGKDWTFNGSAHLDENGYPHIGINIGKDLGAKTGGPKQTSYFKWTGSQWVGGKPVNTQARLDNTDTRGDFMIKSSNEVSFILGY…
174	Ulvan lyase hypothetical protein	Ulvan lyases	4.2.2.-	Ulvan	Catenovulum agarivorans DS-2	PL25	52.7076	MKKLIKHVVPLFTVAIFSMLIGCKSIQQAPVIEEVEMVEYFADNALGTPVAVVQHPAGIHKDGITYVSYQGPLTDPYVAAYNHNTKQWQGPYQAGESDLGRLKSKRKKPDSHGKPTMLIDDLGYIHVFFGGHGGSREHGENLLGNYNSGRNKHVVSKRPGDISEWQELKNISVFGTYNQALKMDNGDIYLIYRHGAHRSDWVYQKSTDHGRTFAEPVSFLKHKPHEERDMHDSWYVWATRGQNDDIIMGYDYHYCWNGHPRGHIPERHDLYYMVFDTKNNSWRNVKSEPLSIPVTRQIADEKTLVARTGGDDMWTFNGTAHLAPNGYPHLSINVGKDTGQPWGGAKQTRYYSWTGKAWIGGHQVNNQLSQNRGSEGDFVIESNNKVKFTLAYQEKNNDA…
175	Alginate lyase / Poly(β-mannuronate) lyase	Alginate lyases	4.2.2.3	Alginate	Nonlabens ulvanivorans	PL17	41.0561	TEEERAKIESDLLRPMAKFLSVDSYDVFNKIHNHGTWSVAAVGMTGMVLGDDDMIDRSIYGSNKDSKTGFIAQLDHLFSSDGFYSEGPYYHRYAILPFIAFAEAIENNRPDVKIFEHRDGILRKAVTTLLQLTDEQGRFYPINDAIKSKTWESDEVVFATNIAYKQYKDASLLPVIKMMNKISLTDAGAIAANAITDTTEDFYERPSMFIADGVDGNSGGLSLMRSPQNTAGQLQTVLKFSTQGMGHGHFDRLTLSVYDHGNEIIPDYGAARFLNIETKRGGRYLPENKTYAQHTIAHGAVVLDQKSQYKGNVKYSEEHVSQLVKNDMSNDRLQVTIAADTMAYDGSKLSRSITMVN
176	Alginate lyase	Alginate lyases	4.2.2.-	Alginate	Nonlabens ulvanivorans	PL6	44.0542	TVVKNIEDLQNAIDNAQPGDEIILSNGVWKNSQIKFHATGTEKQPITLRAETPGEVTLEGESVLKISGEHLIVKDLYFKNGYTPDEAVIIFRNSPDSIAYNCRVTGTVIEDYTQLDRHRKDHWVEFYGQYNELDHSYIAGKSNEGPTVKVYLNDNRHINNYHKIHDNHFGPRPRKGGPKAETMQLGASMTSMTPSYTQVTNNLFEKCNGEVEIISSKSNFNNFSNNVFLESEGSVVTRHGNYATISGNLFIANDNPYVGGIRVINTGHWITNNYFYGLKGQEFRAALAVMNGIPKSPLNRYNQVTDAVIAHNSWINCEQPIHFSVGVNLDQAEVLPPSEIRSARPERVIFANNFVYNQSATSYPIKAYDKIDGVKFKSNLY
177	Ulvan lyase	Ulvan lyases	4.2.2.-	Ulvan	Nonlabens ulvanivorans	PL28	54.676	MVFFKDLFIFKSLIKGSLYSGHMKKKLLNYLPLFALMLFTVSMMAQTAPDEDTNSSIACPSSGVFQNNTTRDVDIANPDNVGTVDDRTCYADYYETSVYGETWGAYNITFNSNHWDAPNTLQPRIERSLSRSQETGVGSYARFTGTLRILEVGNTGTFGSTGSYLMQAKGKHTGGGGSNDPAICLYLARPVYGPDANGNQVQVSFDIWREQINFRGGSGAAGRTEVFLRNVLKDEIIDIELEVGFRQDPNDPNLKIHYSDAIIGGQVFNWNIPEPERGRESGIRYGVYRVKGGRAQMRWANTTYQKVEVVDNSTIPAADIYRIKNVETGEYLTSSGSSIIASTSGTGSDKEWEIISAGSGSSYVNIDSQVRGIIRFTGGSSNPGLVSTNFSPPNTDTDK…
178	Ulvan lyase	Ulvan lyases	4.2.2.-	Ulvan	Nonlabens ulvanivorans	PL28	32.069	MRKLKYNTTRVILMIAFISLSACSSEDAMIEEEQVIPDPDPVAQTDEDTGPVVDCTNQGTNPTRDTDIPNPRNIGDIDDRSCYANYSESSILGKFWGIYNITDGSNHMDAPNTLQPRIERSLSRSQATGAGSYARFRGVLRILEVGDTGTFSSSGSYFMQAKGKHTGGGGSPDPAICLYRAHPVYGDDGNGNQVQVSFDIWREQINFRGGSGSAGRTEVFLKNVLKNEQIDIELEVGFRDDPNNPGQTLHYADAKIGGEEFNWNIPEPERGIESGIRYGAYRVKGGRAQFRWANTSYTKDEVN
179	Ulvan lyase hypothetical protein with type A sorting domain	Ulvan lyases	4.2.2.-	Ulvan	Formosa agariphila	PL28	54.8535	MLEKTTLKNIILIHFLMFLAVVTAQTAPDEDTSAITRCTAEGTNPVRETDIPNPVNVGTIDDRSCYANYKESTVYGKTWGVYNITFDSNDFDTSLQPRIERSLSRSSETGIGSYARLTGVFRILEVGDTSGTSQDGTYLAQAKGKHTGGGGSPDPAICLYLAKPVYGTGEDADKQVSFDIYAERILYRGGEGDGREIVFLKNVKKDEETNFELEVGFKEDPNDVSKKIQYCNAVIGGDTFNWNIPEPERGTESGIRYGAYRVKGGRAQIRWANTTYQKVENVEVTNPGPIGDVYKLKNVATGQYLSDSGVSASAVIMSDSGEAQNNYWTFVESGSLFNIDNETFGILRAPGAGGPGGAYVVVSTTKEGPSSDGDKVWTIHYNESNDTYRFESGSSGRFM…
180	Unsaturated rhamnogalacturonyl hydrolase	Rhamnogalacturonyl hydrolases	3.2.1.172	α-L-rhamnopyranose	Mariniflexile sp. TRM1-10	GH105	42.2297	MKRSLLFISLGFLIAQISFGQQPFNKKEVLAQMELANKYFMEKWPDVGKTIVTNRERPSNIWTRGVYYEGLMALYEIYPREAYYDYAYAWSEFHNWGFRNGNANRNADDYCAAQTYIDLYNLEPDPKKLKNTKSCINMLLNTPQLDDWSWIDAIQMGMPVFAKLGVLENDNRYYEKMYDMYMYTRNKHGDNGLFNPKDGLWWRDADFDPPYTEPNGEDSYWSRGNGWVIAALAKVLAIIPEDAPHRKQYIVDLKSMAEALVPIQRKDGFWNVSLHDPNHYGGKETSGTALFVYGMAYGVNNGILDKNKYLPVIEKAWNAMIKEALHKNGFLGYLQSTGKEPKDGQPLSYDKVPDFEDYGLGCFLLAGAEIYRMQ
181	Unsaturated rhamnogalacturonyl hydrolase	Rhamnogalacturonyl hydrolases	3.2.1.172	α-L-rhamnopyranose	Mariniflexile sp. TRM1-10	GH105	48.5723	MKYLNTTIKNVIFCFLLTTIHANAQVNDATAPLHALQADYPTPYIVPQKETIKKVLDRVYNYLEENSASKIINATTKNGITDYKKKDVDITFEPGAFRLTSYEWGVTYAGMLLASKATGEAYYADYSNKRIKLITDIAENYPAKNIKDPDMLKTLHPEALDFAGALCAAFIKAKQDGLNANVDPLVNNYIDFISNKQFRLKDGTLARNRPQDNTLWLDDMFMSVPALAQMGKYTGDVTYFDDAVKQVDQFSKRMFNHEKGIYMHGWVQSMEVHPQFHWARANGWAVMAMVELLEVLPKDHQGYSEVLSQLQAHIAGLVKYQDGTGFWHQLLDRNDTYLETSATAIYTYSIARAINRGYIDKMAYAPGVLLGWNAVASKVNDKGQVEGTCVGTGMAFDPA…
182	Unsaturated 3S-rhamnoglycuronyl hydrolase	Glucuronyl hydrolases	3.2.1.-	L-enopyranosiduronic acid residues (end products of the ulvan lyase)	Nonlabens ulvanivorans	GH105	43.2235	MNKSILLLVTLLSLYSCTDTEKTPLEEKDVFNEDYIKTSMIKALEWQEAHPIFAIHPTDWTNGAYYTGVARAHHTTKNMMYMAALKNQAVANNWQPYTRLYHADDVAISYSYLYVAENEKRRNFSDLEPTKKFLDTHLYEDNAWKAGTNRSKEDKTILWWWCDALFMAPPVINLYAKQSEQPEYLDEMHKYYMETYNRLYDKEEKLFARDSRFVWDGDDEDKKEPNGEKVFWSRGNGWVIGGLALLLEDMPEDYKHRDFYVNLYKEMASRILEIQPEDGLWRTSLLSPESYDHGEVSGSAFHTFALAWGINKGLIDKKYTPAVKKAWKAMANCQHDDGRVGWVQNIGAFPEPASKDSYQNFGTGAFLLAGSEILKMR
183	Pectate lyase	Pectate lyases	4.2.2.2	(1,4)-α-D-galacturonan from pectate	Rhodopirellula baltica SH 1	PL10	36.9365	MSAARDTTTFGFFQRFNMQRISIAILAVLTVNASLLSAATPAEKVAKQTDEWFRGAEGQHAMRCILSWQTDHGDWPKNTDTTSKLFTAGDDKPNGTFDNGATIGELQALARAFKASGQDEYKSAFLKGFDHLLAAQYPNGGWPQYFPLSKKYHRHITFNDGTMINIMQFLEEVAEIPTYEFLDEQRLVRTRTALTRGIECILDCQVIVDGERTVWCAQHHAETLAPVLARSYEPPSLSGAESAGILLYLMELDEPSPRVIQAVESGVKWFDSVQVNGYRYQKRKELPSLIADNNAPSIWARFYDIKTNRPMFSDRDGTIVYDLDLVGEERRSGYTWYGNWGSKVAKAHAKWMK
184	Alginate lyase (probable)	Alginate lyases	4.2.2.3		Rhodopirellula baltica SH 1	PL7	26.7029	MRLLLTACLIVISLPTVVAETPADVLDLSRWRLTLPTESDKRGSPSEIRQPELASFSHPEHFHVRDQAGVVFRAHCGGATTKGSSFPRCELREMAPDEVNRADWSTDDKTIHTMTVRVAITATPRKKKHVVCAQIHDADDDLMMVRLEGEKLFIERNEVGEVMMERHYQLGTEFELKIEAGKGHVRVFYNGEEKMNWKVSRDGCYFKAGCYTQSNLKKGDDADSYGEVVISMLQLDEINTEDQ
185	Pectate lyase	Pectate lyases	4.2.2.2	(1,4)-α-D-galacturonan from pectate	Rhodopirellula baltica SH 1	PL1	48.7006	MTRPFLNVIAIVGILFIAADASAQKPLAFPTAEGYGKYTTGGRGGQVFEVTNLNDSGKGSLRAAVEAKGPRTVVFRVSGTIKLNSDLRIKNPNITIAGQTAPGDGICLRGYPLMISADEVIIRYIRVRFGDESGKDADAISARYVKNLILDHVSASWSVDETMSIYHCENVTVQWCMITESLFDSNHSKSNHGFGGIWGSNHSTYHHNLIAHHSSRNPRFASGCGNTDYRNNVVYNWGYRSCYGGEKRQNDKFNFTNINMVANYYKPGPATDPARAAELAEPSSRGADDKGHWYVAENVIEGSPTVSADNWSGVRGANYIQLDQPWEAMPINQQTAEEAFEDVLQHAGASWPKRDPIDTRIIQEVRDGTATYEGVYKTKKRVSSDTQITGIIDSQQDVG…
186	Pectate lyase	Pectate lyases	4.2.2.2	(1,4)-α-D-galacturonan from pectate	Rhodopirellula baltica SH 1	PL1	34.6053	MATARLKLPSASNSYHSMANLSMNDQPSNPLFAGLLSIFFVAFVWTPLASAEESDAPIGWASVSGRGVETTTGGRNGDVVTARTAEELAEYASSPEPLTILIEGTITGDGQIKISSNKTLLGLGASTSLKNIELNMSGVSNIIIRNLHISDARDAIALRRTHHVWVDHCDLSECGDGLLDITHQSDFVTVSWTRFSKHHKTMLINSGTSQPEDSGYLNTTIHHCRFDGSDTRNPRVGYGKVHVFNCLYTKSDYGIGLHSQCLVLAERNHFDQVKHPIKQMYRPDPTDIHHGFCESVENVFQDCRGAQDDEGKSFPAKEFYEYESKMDDVARVPEIVQSNAGPQEHIGRTASRQ
187	Pectate lyase	Pectate lyases	4.2.2.2	(1,4)-α-D-galacturonan from pectate	Rhodopirellula baltica SH 1	PL14	54.4504	MQHSTVSHVFFFFAVSFAVVVLFGSGSLMADPSDWAEGTQEHNDGANREHYNQAASLRWAHFMGDWCDAKGTEQGETVYAIAEVSDTDTLTPVRWDVTTLANEWGQGTHPNQGMFLRVVEGSGRIAFASRESTDETLRPKLELTGKNGTAILDAVADTFLTKWTYRSQGQANELRVSAEAENLLVRFDLEQATDIGTITRATLVLLSPQQFGSASIGVFRCNQGESDVPTSPALGIAAKYENDRGIANDLDVIFATGFERADWKSEWTQVGKDGKVDTVNPESRSEGFLPLQGKALRSRIDEGEFTALNTLYKFDERIGSEPEEIYFRYHLRLADDWNQTVQGGKLPGISGTYGRAGWGGRKSDGTDGWSARGLFQKTVPAGNPLAGRTPIGFYCYHAD…
188	α-L-fucosidase	Fucosidases	3.2.1.51	α-L-fucoside	Rhodopirellula baltica SH 1	GH29	45.8911	KNIHATIAEGPFEADWNSLEKYEIPQWYKDAKFGIFIHWGAYSVPAYGSEWYPRQMYIDRDRRGDNFFQHHIDTYGPQKTFGYKDFIPQFKAEKFDAKAWAQLFKDTGARYVIPVAEHHDGFPMYDCAFTRWDASEMGPKRDVIQELSEAVRAKGMKFGVSSHRAFNWMFYVRDESFDNADPQYADLYGRPMPFLFEENAWDYQHNFTPQDDQFKDDWLARSCELVDKYKPDVFWFDFGITPKHGDSTHENNTYAEHLQKFAAYYYNKTSAKDSDLGIINYKFNAFPESAAVLDKERSKMAEIRKPFWQTDTAVSSSSWGYTENQRYKTPERLVNDLVDIVSKNGCLLLNVGPRADGTIPEEDQAILKAIGDWLKVNGEAIYD
189	Endo-β-1,4-xylanase (similar)	Xylanases	3.2.1.8	(1,4)-β-D-xylosidic linkages in xylan	Rhodopirellula baltica SH 1	GH10	37.5803	LPMGMAVSPSQVVLSADPISLTADSARYRAIIENYFDTLTDGGEAQWGPWEEDSQLPTDFLQWVVDRDALYHGHALVWGELDRFPAPADLLTNYEQVETTEGPVAAKAWLEREVLTHIATGPASAFSGTRDGTDEPLVTWWDVINHPIFSDDLWDIVGDDFMLDVIEAARAVVHPDTRLIINEFDILSNPDNGQSDDFFNLLTFLDAQSASGRADYDTIGFQGHFLSERLPAIDRVLAELDRYESFGRNFQITEFDVDALFIDEQTQADFTRDFYQLLASNQAASLFTPWGVWEGDHWRSEEEAALFNQDWTPKPNGQWLLD
190	Endo-β-1,4-xylanase (probable homolog)	Xylanases	3.2.1.8	(1,4)-β-D-xylosidic linkages in xylan	Rhodopirellula baltica SH 1	GH10	65.4321	MIMRWWLAPVAIALLLSSLGTPATLIHAFAQESQTPAEGTMLVPTAEFRLDARPGTGSIDRQNNLITVDCPAPQEEAWALQVQCEPISNSVSAFEVFCVSFDARALPSNTDGLGSIHVSMATNDPWEPIEEPNGFRTFDVPNQWHPFRICFRAKQDYDAKRVYASIQCAEKKQRLEIRDLKLVGLGNVPDASLPFTRLFYPGADNDAWRSEAQRSIDRHRKRNLTIRVVDAAGQPLAGATVQVQQQKHDYAFGTFVGNTPIHAGEDAAKFRDQTKRWFNRVTLPRYWADWGTDRPAGVVKADATAEWAIDAGFEIKNHLLLYPQFIPDRVKQLADQPSRFQTEIETAMDAALERTRDMPIAVWDAINELRDVSLVGDVLGRDYYADVFNRGQRSQPNAR…
191	Endo-β-1,3-glucanase hypothetical protein	Laminarinase	3.2.1.39	1,3-β-glucans	Bacteroides cellulosilyticus	GH157	101.846	MCDNRNFFFNLIIMMNLKTRILKQKLAMLVIMCLLSMTDTWAQFSSSPDVEVKNNSFYIDGKKFFIKGIGYEIGALPGELPNERKFNPDQLHFDIRRILSGGFNTIRTWAAFTEQELEVLRQYDIKIIMGIWIDPAGDFSNTQFVDNAKTIVNDVLSYSKNYNNIIGYLIMNEPHPTAVLGAGYQHTVNLWTELVNIIHSQHPNRPVSIANTPNGTYIHPHIFDFSAYNVYIYNPVTVNYLHGYRNHIDYLQQLNSSDHPLIITEYGLSVSPTGPGGWGYGGNSLSEQESGDVYMYKSLVDGGANGACIFNYSDGWWKADDEFVHSDLPEEWFGLIEYSSLSDKQGHERPVWKAIRDFQSAIIAQPRSEEIYIDKVPVEIFFNDTIKKIKVLLEDKLIY…
192	Ulvan lyase hypothetical protein	Ulvan lyases	4.2.2.-	Ulvan	Vibrio celticus	PL25	52.4409	MTITNDNLSHTQPVTTTPSRFKKRLLASAMILSLGTTAFNATADQTEKDKGEMVDYFANNGFGNPLAVVQAPAGIYENGITYLTYQGDLEDPYVVAYNHETKEWQGPIKAGFSELGKDNYWAPSGRAIDNHGKPTMIIDDLGFIHIFFGGHGGGARHGENPLGDVHDGKNKHIVSKKPHDISDWVELDNIPPFGNYNQAVKMDNGDIYLFYRHGAHESDWVYQKSTDHGRTFEDPVSFLKHKERDDVEAVDSWYAWAVKGQGDDIIITYDYHLCWKTHANNGRGHTTERHNTYYMVFNTKEGTWRNVQGETFDLPVTKELADKKTLAFDTEDKWTFNGSVHLDQDGNPHIGTNIGVDLGVKKTGGPKQTSHIRWTGEEWIGGNPVNPAAVNWGVDTRGD…
193	Endo-(1,4)-fucoidanase (possible) with C-terminal target domain	Fucosidases	3.2.1.212	(1,4)-α-L-fucoside linkages in fucan	Aquimarina sp. BL5	GH107	53.2032	QQNSEVPWMEGSWGVRLIIRGGKDLDRYVANGYDYVEAAKQIVRDYPTIGHVITNLTNNANSSLYTVRQNNYIDVANEIHPDFVPSLENEQIIFDVIKVFKDAGIKVILYINHWPNMGEGSAAQIAGWDAYKNRNNLGNYPAFNLLMRGFLERFDGLVDGYWIDKIGGSDDSIPRKDIFINVIKETNPGAALGVNFNKSYFPGIKVDSDGVNERDEDDYKIIKYQANDIWSQFTAGHVTSIGGQKAPSNSWGYEEYTVTDMEESPLSVHPETGKVFVKHMFAPIRRRWSLNDEPLMYDKDQAYRMVKRITSAGASITFSTTITNGGLAMPDEVEVLKHVNDQLEANADYVPYTRPEQAYLVGETRPNYHQFIDFREIPNKKVGDPDFSPFAHASSGAAV…
194	Endo-(1,4)-fucoidanase (possible)	Fucosidases	3.2.1.212	(1,4)-α-L-fucoside linkages in fucan	Alteromonas sp. SN-1009	GH107	36.6928	KADWMQGNWGISYRIPGGDINYSGSHVAEYNVRAAVEQISAIPGLKWVQINLTNGASGDRFIVPVTEVEAINPLSAPNSINDLYDPTLPGRDLFEQLALAFKAKGIRVVAYIATQGPGMLKHGAENSMDEDDSITDCKSSKPLVTDLDTQVYCSANMNRWRDYVLEQYPSTSLYRSFELAMVNIVETLSLRYGSTIDGWWFDHSGFGDSELLHAAALAGNNDAAVAFNEGDKVPLVNNPETLDDYTFGHPTPIGSEVSSDDKNLPMLTSIEATLDGILTGSGDDVGSVGHMFMPLQESWNGGTVVFSEAKGSDWLNRALKAGGAFTW
195	Endo-(1,4)-fucoidanase (possible)	Fucosidases	3.2.1.212	(1,4)-α-L-fucoside linkages in fucan	Alteromonas sp. SN-1009	GH107	34.7917	SHVNEYQVAPAVEQIAAIPGLKWLQVNLSNGAFGDRFIVPVPEVEAINPNSAPNSSADLFDPALPGDDLFEQIALGLQAKGIKVVAYIATQGPAMLKHGAERSMDFDDSIVDESDGSACKSSRPVVSDPDTQVYCSANMNRWRDYVLQQYPSTSLHHSFQLGLVNIVETLSLRYGTLIDGWWFDHSIYGDYNLLPDAARAGNSNAAVSLNLEGDIFLSNNPEVMEDFTGGHPTPIARVVSSDDTNLPMLTAIEDAPNGIFTGTGDDVDALGHMFLPLQETWNGGTVVFSEAKGTEWLNRVTRAGGALTW
196	Alginate lyase	Alginate lyases	4.2.2.-	Alginates	Agarivorans sp	PL7	31.4152	MKNHLLALSALLAVSTLASANVQFSDNNGSLGEPVNYPQFQHVLSESELQISDAEGKKGNKEYFALDGDFTGIVNPYFYVDKTSEALVFKMKNDHLRNEVRVHKNFRTDLPDHFYSLRADVEMIDPEASMKNSDSKQDEITFLQVHNKGLDDEGTHNVPHPLLRVVWKRDANGVKGHFWAIIKNNAVICKGSFGKKNKDKNMCKPDVAYSHIDLGKAPTGKTTAFDITVGNKTLSIDVDGTNLVKHDIDYWRHLLSYFKAGVYNQFTHGMSEAHFYKLEYSAAEPK
197	Alginate lyase	Alginate lyases	4.2.2.-	Alginates	Azotobacter vinelandii	PL7	27.8128	MIDLSHWNLTIPVDAEIIQTEDLQTYASPWFIRNADGSITFFAPSSGDGIKSTKNSTYPRSELRETLPNGDDDEANWSLDSAPVHQLSATLTVDSLPASGKAIIGQFHGESNHPPFKLQVARLAGSADTFKINVQHRPKLNGKELRPSFSRPFKLGEEFSYDVQVTSTGKLSVTIDDETVSGQFDIRSYKNDKWYAKAGIYSQEMVSGKGAGRATFYAIDMTHGDKAGDRPEQSRRELQR
198	Poly(α-L-guluronate) lyase	Alginate lyases	4.2.2.11	Alginates	Corynebacterium sp. ALY-1	PL7	25.5112	MTLTRKRGLTAALTATALLVGSMVVGGSGAAAAEPCDYPAQQLDLTDWKVTLPIGSSGKPSEIEQPALDTFATAPWFQVNAKCTGVQFRAAVNGVTTSGSGYPRSELREMTDGGEEKASWSATSGTHTMVFREAFNHLPEVKPHLVGAQIHDGDDDVTVFRLEGTSLYITKGDDTHHKLVTSDYKLNTVFEGKFVVSGGKIKVYYNGVLQTTISHTSSGNYFKAGAYTQANCSNSSPCSSSNYGQVSLYKLQVTHS
199	Alginate lyase / Poly(β-mannuronate) lyase	Alginate lyases	4.2.2.3	Alginates	Klebsiella pneumoniae	PL7	32.6294	MLKSGVMVASLCLFSVPSRAAVPAPGDKFELSGWSLSVPVDSDNDGKADQIKEKTLAAGYRNSDFFTLSDAGGMVFKAPISGAKTSKNTTYTRSELREMLRKGDTSIATQGVSRNNWVLSSAPLSEQKKAGGVDGTLEATLSVDHVTTTGVNWQVGRVIIGQIHANNDEPIRLYYRKLPHHQKGSVYFAHEPRKGFGDEQWYEMIGTLQPSHGNQTAAPTEPEAGIALGETFSYRIDATGNKLTVTLMREGRPDVVKTVDMSKSGYSEAGQYLYFKAGVYNQNKTGKPDDYVQATFYRLKATHGAQR
200	Alginate poly(ManA) lyase	Alginate lyases	4.2.2.-	Alginates	Photobacterium sp.	PL7	31.2289	MIKSNLVISSLAIVSSMSYAGVEFSNPSGQLGEPANYTQFANILSASELQISDPNGKKGNKEYFALDNDFTGIVNDNFYVDKQSQALVFKMANDHLRNELRVQKNFRTDLPDHFYTLYANVEILHPLQSMANSTSKQNEITFLQVHNKGLDDQGTHNVPHPLLRVVWKENNQGVKGHFWAITKNNAVICKGSFGKKNKDKEMCRADVAYSKIDLGPAPTDKGTDFTITVGNKTLAIDVNGQRKVEKNIDYWRHLLSYFKAGVYNQFTQGESEAHFNQLRYQVNTP
